# Supplementary material
Source: PubMed Central journal article supplement (PMC4524141)
Supplement: AEM.00101-15_zam999116319so1.pdf [file AEM.00101-15_zam999116319so1.pdf]

**Supplemental material for Heinken, A. and Thiele, I.**

**Supplemental Results**

**Supplemental Tables S1, S3-S7**

**Supplemental Figures S1-S7**

## Supplemental Results

### Correlation between metabolic distances between microbes and microbe-microbe interactions

Under the expectation that metabolic distance would correlate with giver/consumer interactions and inversely correlate with competitive interactions, we plotted the Jaccard reaction and metabolite distance scores (determined in Ref. <sup>1</sup>) against the percentage of interactions for each pair (Figure S2). However, we found that reaction and metabolite distance could only poorly explain the giver/consumer, mutualistic, or competitive interaction displayed per pair (Figure S2). The correlations between the reaction and metabolite distances and the percentages of giver/consumer relationships were 36% and 32%, respectively (Figure S2a-b). For competitive relationships, the correlation was 35% for the reaction distance and 31% for the metabolite distance (Figure S2c-d). Accordingly, we found differences in the predicted behavior between the *E. coli* MG1655 and the *E. coli* O157:H7 strains despite reaction and metabolite distance scores of 0.03 or less between the three *E. coli* strains (Figure 1c, Figure S2). We conclude that metabolic proximity does not provide an adequate explanation for the capability of certain pairs to engage in commensal, mutualistic, or competitive interactions. The more likely explanation for the observed species-specific differences in interaction type is the metabolic functions encoded in the bacterial genomes. It should be noted, however, that the observed low metabolic proximity between most of the 11 microbes is partly due to reconstruction bias, which leads to the inclusion or omission of certain pathways.

## Supplemental Tables

**Table S1:** Description of the included reconstructions and the reconstructed species. Modifications to the reconstructions are described in Ref. <sup>1</sup>.

| Reconstructed Organism                            | Type                   | NCBI Taxonomy ID | Reconstruction Version | Reactions | Metabolites | Genes | Ref.          |
|---------------------------------------------------|------------------------|------------------|------------------------|-----------|-------------|-------|---------------|
| <i>Bacteroides thetaiotaomicron</i> VPI-5482      | Commensal              | 226186           | iAH991                 | 1528      | 1176        | 993   | <sup>2</sup>  |
| <i>Faecalibacterium prausnitzii</i> A2-165        | Commensal              | 411483           | iFpraus_v1.0           | 1030      | 833         | 602   | <sup>3</sup>  |
| <i>Escherichia coli</i> str. K-12 substr. MG1655  | Commensal              | 511145           | iEco1339_Mg1655        | 2428      | 1705        | 1338  | <sup>4</sup>  |
| <i>Lactobacillus plantarum</i> WCFS1              | Probiotic              | 220668           | Unnamed                | 777       | 662         | 724   | <sup>5</sup>  |
| <i>Lactococcus lactis</i> subsp. cremoris MG1363  | Probiotic              | 416870           | Unnamed                | 751       | 650         | 518   | <sup>6</sup>  |
| <i>Streptococcus thermophilus</i> LMG 18311       | Probiotic              | 264199           | Unnamed                | 556       | 549         | 422*  | <sup>7</sup>  |
| <i>Helicobacter pylori</i> 26695                  | Opportunistic Pathogen | 85962            | iIT341                 | 555       | 485         | 339   | <sup>8</sup>  |
| <i>Klebsiella pneumoniae</i> MGH 78578            | Opportunistic Pathogen | 1328388          | iYL1228                | 2262      | 1658        | 1229  | <sup>9</sup>  |
| <i>Salmonella enterica</i> subsp. typhimurium LT2 | Pathogen               | 99287            | STM_v1.0               | 2623      | 1864        | 1288  | <sup>10</sup> |
| <i>Escherichia coli</i> O157:H7 strain Sakai      | Pathogen               | 386585           | iEco1345_Sakai         | 2372      | 1688        | 1345  | <sup>4</sup>  |
| <i>Escherichia coli</i> O157:H7 strain EDL933     | Pathogen               | 155864           | iEco1344_EDL933        | 2376      | 1686        | 1344  | <sup>4</sup>  |
| Homo sapiens (small intestinal enterocyte)        | Host                   | 9606             | hs_sIEC611             | 1282      | 844         | 611   | <sup>11</sup> |

**Table S3:** Uptake constraints on external exchanges in the framework implemented to simulate the three *in silico* dietary regimes (Figure 2b).

| Metabolite type/ BiGG ID | Metabolite                        | Uptake rate (mmol*gDW <sup>-1</sup> * hr <sup>-1</sup> ) |                 |              |
|--------------------------|-----------------------------------|----------------------------------------------------------|-----------------|--------------|
|                          |                                   | Adjusted to carbons per molecule                         |                 |              |
| Simple sugars and starch |                                   | Western diet                                             | High fiber diet | Protein diet |
| fru                      | Fructose                          | 0.29486781                                               | 0.0625          | 0.15625      |
| glc                      | Glucose                           | 0.29486781                                               | 0.0625          | 0.15625      |
| gal                      | Galactose                         | 0.29486781                                               | 0.0625          | 0.15625      |
| man                      | Mannose                           | 0.29486781                                               | 0.0625          | 0.15625      |
| lcts                     | Lactose                           | 0.14743391                                               | 0.03125         | 0.078125     |
| malt                     | Maltose                           | 0.14743391                                               | 0.03125         | 0.078125     |
| sucr                     | Sucrose                           | 0.14743391                                               | 0.03125         | 0.078125     |
| melib                    | Melibiose                         | 0.14743391                                               | 0.03125         | 0.078125     |
| strch1                   | Soluble starch                    | 0.21444932                                               | 0.04545455      | 0.11363636   |
| Fiber                    |                                   | Western diet                                             | High fiber diet | Protein diet |
| inulin                   | Inulin                            | 0.00078365                                               | 0.01527778      | 0.00694444   |
| levan1000                | Levan                             | 2.351E-05                                                | 0.00045833      | 0.00020833   |
| starch1200               | Insoluble starch                  | 1.9591E-05                                               | 0.00038194      | 0.00017361   |
| arabinogal               | Arabinogalactan                   | 3.6528E-05                                               | 0.00071214      | 0.0003237    |
| pect                     | Pectins                           | 5.5644E-05                                               | 0.00108481      | 0.0004931    |
| pullulan1200             | Pullulan                          | 1.9591E-05                                               | 0.00038194      | 0.00017361   |
| amylose300               | Amylose                           | 7.8365E-05                                               | 0.00152778      | 0.00069444   |
| lmn30                    | Laminarin                         | 0.00078365                                               | 0.01527778      | 0.00694444   |
| raffin                   | Raffinose                         | 0.00783653                                               | 0.15277778      | 0.06944444   |
| stys                     | Stachyose                         | 0.0058774                                                | 0.11458333      | 0.05208333   |
| oligofru4                | Oligofructose                     | 0.0058774                                                | 0.11458333      | 0.05208333   |
| dextran40                | Dextran                           | 0.00029387                                               | 0.00572917      | 0.00260417   |
| Fat                      |                                   | Western diet                                             | High fiber diet | Protein diet |
| arachd                   | Arachidonic acid                  | 0.00386729                                               | 0.00220988      | 0.00220988   |
| chsterol                 | Cholesterol                       | 0.00575975                                               | 0.00329129      | 0.00329129   |
| glyc                     | Glycerol                          | 2.09119895                                               | 1.19497083      | 1.19497083   |
| hdca                     | Hexadecanoic acid                 | 0.46058299                                               | 0.26319028      | 0.26319028   |
| hdcea                    | Hexadecenoic acid                 | 0.04243272                                               | 0.02424727      | 0.02424727   |
| lnlc                     | linoleic acid (all cis C18:2) n-6 | 0.41728993                                               | 0.23845139      | 0.23845139   |

|                                  |                                  |                     |                        |                     |
|----------------------------------|----------------------------------|---------------------|------------------------|---------------------|
| lnlnca                           | alpha-Linolenic acid, C18:3, n-3 | 0.02041092          | 0.01166338             | 0.01166338          |
| lnlncg                           | gamma-linolenic acid             | 0.02041092          | 0.01166338             | 0.01166338          |
| ocdca                            | octadecanoate (n-C18:0)          | 0.19670876          | 0.112405               | 0.112405            |
| ocdcea                           | octadecenoate (n-C18:1)          | 0.79184823          | 0.4524847              | 0.4524847           |
| octa                             | octanoate (n-C8:0)               | 0.01503944          | 0.00859397             | 0.00859397          |
| ttдца                            | tetradecanoate (n-C14:0)         | 0.07979793          | 0.04559882             | 0.04559882          |
| <b>Protein</b>                   |                                  | <b>Western diet</b> | <b>High fiber diet</b> | <b>Protein diet</b> |
| ala-L                            | L-alanine                        | 0.3                 | 0.3                    | 0.6                 |
| arg-L                            | L-arginine                       | 0.15                | 0.15                   | 0.3                 |
| glu-L                            | L-glutamate                      | 0.18                | 0.18                   | 0.36                |
| gly                              | Glycine                          | 0.45                | 0.45                   | 0.9                 |
| ile-L                            | L-isoleucine                     | 0.15                | 0.15                   | 0.3                 |
| leu-L                            | L-leucine                        | 0.15                | 0.15                   | 0.3                 |
| lys-L                            | L-lysine                         | 0.15                | 0.15                   | 0.3                 |
| met-L                            | L-methionine                     | 0.18                | 0.18                   | 0.36                |
| pro-L                            | L-proline                        | 0.18                | 0.18                   | 0.36                |
| asn-L                            | L-asparagine                     | 0.225               | 0.225                  | 0.45                |
| asp-L                            | L-aspartate                      | 0.225               | 0.225                  | 0.45                |
| his-L                            | L-histidine                      | 0.15                | 0.15                   | 0.3                 |
| phe-L                            | L-phenylalanine                  | 0.099               | 0.099                  | 0.198               |
| ser-L                            | L-serine                         | 0.3                 | 0.3                    | 0.6                 |
| thr-L                            | L-threonine                      | 0.225               | 0.225                  | 0.45                |
| trp-L                            | L-tryptophan                     | 0.081               | 0.081                  | 0.162               |
| tyr-L                            | L-tyrosine                       | 0.099               | 0.099                  | 0.198               |
| gln-L                            | L-glutamine                      | 0.18                | 0.18                   | 0.36                |
| val-L                            | L-valine                         | 0.18                | 0.18                   | 0.36                |
| cys-L                            | L-cysteine                       | 0.3                 | 0.3                    | 0.6                 |
| <b>Vitamins/ minerals/ other</b> |                                  | <b>Western diet</b> | <b>High fiber diet</b> | <b>Protein diet</b> |
| adocbl                           | Adenosylcobalamin                | 1                   | 1                      | 1                   |
| avite1                           | alpha-Tocopherol                 | 1                   | 1                      | 1                   |
| ca2                              | Calcium                          | 1                   | 1                      | 1                   |
| cbl1                             | Cob(I)alamin                     | 1                   | 1                      | 1                   |
| chol                             | Choline                          | 1                   | 1                      | 1                   |

|         |                          |   |   |   |
|---------|--------------------------|---|---|---|
| cl      | Chloride                 | 1 | 1 | 1 |
| cobalt2 | Co <sup>2+</sup>         | 1 | 1 | 1 |
| cu2     | Cu <sup>2+</sup>         | 1 | 1 | 1 |
| fe2     | Fe <sup>2+</sup>         | 1 | 1 | 1 |
| fe3     | Fe <sup>3+</sup>         | 1 | 1 | 1 |
| fe3dcit | Fe(III)dicitrate         | 1 | 1 | 1 |
| fol     | Folate                   | 1 | 1 | 1 |
| h2s     | Hydrogen sulfide         | 1 | 1 | 1 |
| k       | potassium                | 1 | 1 | 1 |
| mg2     | magnesium                | 1 | 1 | 1 |
| mn2     | Mn <sup>2+</sup>         | 1 | 1 | 1 |
| mobd    | Molybdate                | 1 | 1 | 1 |
| mqn8    | Menaquinone 8            | 1 | 1 | 1 |
| na1     | Sodium                   | 1 | 1 | 1 |
| nac     | Nicotinate               | 1 | 1 | 1 |
| orot    | Orotate                  | 1 | 1 | 1 |
| pHEME   | Protoheme                | 1 | 1 | 1 |
| phyQ    | Phylloquinone            | 1 | 1 | 1 |
| pime    | Pimelate                 | 1 | 1 | 1 |
| pnto-R  | (R)-Pantothenate         | 1 | 1 | 1 |
| pydam   | Pyridoxamine             | 1 | 1 | 1 |
| pydx    | Pyridoxal                | 1 | 1 | 1 |
| pydxn   | Pyridoxine               | 1 | 1 | 1 |
| retinol | Retinol                  | 1 | 1 | 1 |
| ribflv  | Riboflavin               | 1 | 1 | 1 |
| sel     | Selenate                 | 1 | 1 | 1 |
| so4     | Sulfate                  | 1 | 1 | 1 |
| spmd    | Spermidine               | 1 | 1 | 1 |
| thf     | 5,6,7,8-Tetrahydrofolate | 1 | 1 | 1 |
| thm     | Thiamin                  | 1 | 1 | 1 |
| vitd3   | Vitamin D3               | 1 | 1 | 1 |
| zn2     | Zinc                     | 1 | 1 | 1 |

**Table S4:** Pareto frontiers for 55 pairs on 12 scenarios grouped into four types (total n = 600). Type 1: Microbes benefit the other microbe at low growth rates but compete at higher growth rates; Type 2: Microbe benefit each other even at highest possible growth rates; Type 3: Only one microbe benefits the other at low growth rates but competes at high growth rates; Type 4: The microbes compete at every possible growth tradeoff. Examples for the four types are shown in Figure 2. WD = Western diet, HFD = high fiber diet, PD = protein diet, sIEC = small intestinal enterocyte.

| Scenario                     |        | Type 1 | Type 2 | Type 3 | Type 4 | Total |    |
|------------------------------|--------|--------|--------|--------|--------|-------|----|
| - O <sub>2</sub>             | - sIEC | WD     | 16     | 5      | 16     | 8     | 45 |
|                              |        | HFD    | 9      | 5      | 21     | 10    | 45 |
|                              |        | PD     | 18     | 5      | 13     | 9     | 45 |
|                              | + sIEC | WD     | 18     | 0      | 10     | 17    | 45 |
|                              |        | HFD    | 8      | 5      | 20     | 12    | 45 |
|                              |        | PD     | 14     | 5      | 12     | 14    | 45 |
| + O <sub>2</sub>             | - sIEC | WD     | 6      | 0      | 34     | 15    | 55 |
|                              |        | HFD    | 8      | 0      | 38     | 9     | 55 |
|                              |        | PD     | 24     | 0      | 27     | 4     | 55 |
|                              | + sIEC | WD     | 5      | 0      | 34     | 16    | 55 |
|                              |        | HFD    | 6      | 0      | 34     | 15    | 55 |
|                              |        | PD     | 12     | 0      | 32     | 11    | 55 |
| <b>Western diet total</b>    |        | 45     | 5      | 94     | 56     | 200   |    |
| <b>High fiber diet total</b> |        | 31     | 10     | 113    | 46     | 200   |    |
| <b>Protein diet total</b>    |        | 68     | 10     | 84     | 38     | 200   |    |
| <b>Without oxygen total</b>  |        | 83     | 25     | 92     | 70     | 270   |    |
| <b>With oxygen total</b>     |        | 61     | 0      | 199    | 70     | 330   |    |
| <b>Without sIEC total</b>    |        | 81     | 15     | 149    | 55     | 300   |    |
| <b>With sIEC total</b>       |        | 63     | 10     | 142    | 85     | 300   |    |
| <b>Total</b>                 |        | 144    | 25     | 291    | 140    | 600   |    |

**Table S5:** Growth rates achieved when each microbe is grown alone and linked with enterocyte, as well as simultaneously optimized growth of each microbe-microbe pair with and without the enterocyte.

| Scenario                          | BT   | FP   | LP   | LL    | ST   | HP  | KP    | STy   | EC   | ECs  | ECe   |
|-----------------------------------|------|------|------|-------|------|-----|-------|-------|------|------|-------|
| <b>Western diet, no oxygen</b>    |      |      |      |       |      |     |       |       |      |      |       |
| Single                            | 0.22 | 0.13 | 0.13 | 0.11  | 0.07 | N/A | 0.11  | 0.10  | 0.16 | 0.14 | 0.14  |
| With IEC                          | 0.26 | 0.18 | 0.29 | 0.21  | 0.26 | N/A | 0.22  | 0.22  | 0.28 | 0.26 | 0.26  |
| With BT                           | N/A  | 0.04 | 0.58 | 0.19  | 0.19 | N/A | 0.08  | 0.14  | 0.03 | 0.03 | 0.03  |
| With FP                           | 0.31 | N/A  | 0.29 | 0.19  | 0.14 | N/A | 0.21  | 0.35  | 0.46 | 0.42 | 0.42  |
| With LP                           | 0.18 | 0.04 | N/A  | 0.01  | 0.14 | N/A | 0.22  | 0.23  | 0.32 | 0.28 | 0.28  |
| With LL                           | 0.10 | 0.03 | 0.14 | N/A   | 0.10 | N/A | 0.09  | 0.12  | 0.15 | 0.13 | 0.13  |
| With ST                           | 0.09 | 0.08 | 0.01 | 0.04  | N/A  | N/A | 0.01  | 0.01  | 0.02 | 0.04 | 0.04  |
| With KP                           | 0.21 | 0.05 | 0.22 | 0.09  | 0.17 | N/A | N/A   | 0.12  | 0.14 | 0.12 | 0.12  |
| With STy                          | 0.18 | 0.07 | 0.23 | 0.02  | 0.15 | N/A | 0.01  | N/A   | 0.16 | 0.13 | 0.13  |
| With EC                           | 0.34 | 0.03 | 0.32 | 0.02  | 0.29 | N/A | 0.001 | 0.004 | N/A  | 0.01 | 0.03  |
| With ECs                          | 0.32 | 0.05 | 0.28 | 0.02  | 0.15 | N/A | 0.01  | 0.01  | 0.14 | N/A  | 0.06  |
| With ECe                          | 0.32 | 0.05 | 0.28 | 0.02  | 0.15 | N/A | 0.01  | 0.01  | 0.14 | 0.07 | N/A   |
| With BT/ IEC                      | N/A  | 0.05 | 0.59 | 0.20  | 0.25 | N/A | 0.07  | 0.13  | 0.02 | 0.03 | 0.03  |
| With FP/ IEC                      | 0.37 | N/A  | 0.37 | 0.24  | 0.31 | N/A | 0.18  | 0.44  | 0.55 | 0.48 | 0.48  |
| With LP/ IEC                      | 0.17 | 0.05 | N/A  | 0.003 | 0.21 | N/A | 0.35  | 0.37  | 0.35 | 0.28 | 0.28  |
| With LL/ IEC                      | 0.15 | 0.03 | 0.30 | N/A   | 0.25 | N/A | 0.18  | 0.24  | 0.27 | 0.25 | 0.25  |
| With ST/ IEC                      | 0.11 | 0.04 | 0.11 | 0.05  | N/A  | N/A | 0.04  | 0.01  | 0.08 | 0.07 | 0.07  |
| With KP/ IEC                      | 0.28 | 0.14 | 0.38 | 0.16  | 0.29 | N/A | N/A   | 0.22  | 0.27 | 0.25 | 0.25  |
| With STy/ IEC                     | 0.23 | 0.08 | 0.39 | 0.04  | 0.31 | N/A | 0.02  | N/A   | 0.28 | 0.25 | 0.25  |
| With EC/ IEC                      | 0.39 | 0.05 | 0.45 | 0.04  | 0.29 | N/A | 0.001 | 0.004 | N/A  | 0.01 | 0.03  |
| With ECs/ IEC                     | 0.36 | 0.04 | 0.44 | 0.04  | 0.27 | N/A | 0.001 | 0.001 | 0.27 | N/A  | 0.13  |
| With ECe/ IEC                     | 0.36 | 0.04 | 0.44 | 0.04  | 0.27 | N/A | 0.001 | 0.001 | 0.25 | 0.13 | N/A   |
| Scenario                          | BT   | FP   | LP   | LL    | ST   | HP  | KP    | STy   | EC   | ECs  | ECe   |
| <b>High fiber diet, no oxygen</b> |      |      |      |       |      |     |       |       |      |      |       |
| Single                            | 0.44 | 0.07 | 0.04 | 0.04  | 0.02 | N/A | 0.04  | 0.04  | 0.06 | 0.05 | 0.05  |
| With IEC                          | 0.45 | 0.11 | 0.10 | 0.09  | 0.11 | N/A | 0.08  | 0.09  | 0.12 | 0.10 | 0.10  |
| With BT                           | N/A  | 0.38 | 0.71 | 0.28  | 0.35 | N/A | 0.13  | 0.19  | 0.44 | 0.42 | 0.42  |
| With FP                           | 0.12 | N/A  | 0.13 | 0.06  | 0.06 | N/A | 0.06  | 0.19  | 0.41 | 0.21 | 0.21  |
| With LP                           | 0.11 | 0.02 | N/A  | 0.01  | 0.04 | N/A | 0.08  | 0.10  | 0.14 | 0.10 | 0.10  |
| With LL                           | 0.23 | 0.05 | 0.04 | N/A   | 0.05 | N/A | 0.03  | 0.05  | 0.06 | 0.05 | 0.05  |
| With ST                           | 0.20 | 0.04 | 0.01 | 0.01  | N/A  | N/A | 0.01  | 0.01  | 0.02 | 0.01 | 0.01  |
| With KP                           | 0.38 | 0.06 | 0.08 | 0.03  | 0.05 | N/A | N/A   | 0.04  | 0.05 | 0.03 | 0.03  |
| With STy                          | 0.31 | 0.02 | 0.10 | 0.01  | 0.06 | N/A | 0.01  | N/A   | 0.06 | 0.04 | 0.04  |
| With EC                           | 0.08 | 0.07 | 0.14 | 0.01  | 0.17 | N/A | 0.001 | 0.01  | N/A  | 0.01 | 0.001 |
| With ECs                          | 0.10 | 0.03 | 0.10 | 0.01  | 0.06 | N/A | 0.01  | 0.01  | 0.05 | N/A  | 0.02  |
| With ECe                          | 0.10 | 0.03 | 0.10 | 0.01  | 0.06 | N/A | 0.01  | 0.01  | 0.05 | 0.02 | N/A   |



| Scenario                         | BT   | FP   | LP   | LL    | ST   | HP   | KP    | STy   | EC   | ECs   | ECe   |
|----------------------------------|------|------|------|-------|------|------|-------|-------|------|-------|-------|
| With BT/ IEC                     | N/A  | 0.27 | 0.73 | 0.31  | 0.39 | N/A  | 0.10  | 0.16  | 0.24 | 0.05  | 0.05  |
| With FP/ IEC                     | 0.30 | N/A  | 0.18 | 0.09  | 0.17 | N/A  | 0.09  | 0.28  | 0.50 | 0.28  | 0.28  |
| With LP/ IEC                     | 0.10 | 0.03 | N/A  | 0.004 | 0.11 | N/A  | 0.18  | 0.21  | 0.27 | 0.22  | 0.22  |
| With LL/ IEC                     | 0.24 | 0.06 | 0.11 | N/A   | 0.12 | N/A  | 0.07  | 0.10  | 0.12 | 0.10  | 0.10  |
| With ST/ IEC                     | 0.21 | 0.03 | 0.01 | 0.003 | N/A  | N/A  | 0.01  | 0.01  | 0.01 | 0.01  | 0.01  |
| With KP/ IEC                     | 0.43 | 0.08 | 0.18 | 0.06  | 0.13 | N/A  | N/A   | 0.09  | 0.12 | 0.10  | 0.10  |
| With STy/ IEC                    | 0.40 | 0.05 | 0.21 | 0.01  | 0.13 | N/A  | 0.01  | N/A   | 0.12 | 0.10  | 0.10  |
| With EC/ IEC                     | 0.34 | 0.09 | 0.27 | 0.01  | 0.17 | N/A  | 0.001 | 0.01  | N/A  | 0.01  | 0.001 |
| With ECs/ IEC                    | 0.51 | 0.04 | 0.22 | 0.01  | 0.13 | N/A  | 0.001 | 0.001 | 0.11 | N/A   | 0.09  |
| With ECe/ IEC                    | 0.51 | 0.04 | 0.22 | 0.01  | 0.13 | N/A  | 0.001 | 0.001 | 0.12 | 0.01  | N/A   |
| Scenario                         | BT   | FP   | LP   | LL    | ST   | HP   | KP    | STy   | EC   | ECs   | ECe   |
| <b>Protein diet, no oxygen</b>   |      |      |      |       |      |      |       |       |      |       |       |
| Single                           | 0.24 | 0.10 | 0.08 | 0.07  | 0.05 | N/A  | 0.07  | 0.07  | 0.10 | 0.09  | 0.09  |
| With IEC                         | 0.29 | 0.14 | 0.18 | 0.14  | 0.19 | N/A  | 0.14  | 0.15  | 0.19 | 0.17  | 0.17  |
| With BT                          | N/A  | 0.03 | 0.88 | 0.11  | 0.24 | N/A  | 0.03  | 0.04  | 0.03 | 0.02  | 0.02  |
| With FP                          | 0.33 | N/A  | 0.19 | 0.09  | 0.12 | N/A  | 0.08  | 0.28  | 0.77 | 0.31  | 0.31  |
| With LP                          | 0.50 | 0.03 | N/A  | 0.01  | 0.09 | N/A  | 0.15  | 0.18  | 0.22 | 0.19  | 0.19  |
| With LL                          | 0.17 | 0.07 | 0.09 | N/A   | 0.10 | N/A  | 0.06  | 0.09  | 0.10 | 0.09  | 0.09  |
| With ST                          | 0.06 | 0.05 | 0.01 | 0.01  | N/A  | N/A  | 0.01  | 0.05  | 0.02 | 0.01  | 0.01  |
| With KP                          | 0.27 | 0.10 | 0.15 | 0.06  | 0.10 | N/A  | N/A   | 0.08  | 0.08 | 0.07  | 0.07  |
| With STy                         | 0.28 | 0.02 | 0.18 | 0.02  | 0.06 | N/A  | 0.01  | N/A   | 0.11 | 0.08  | 0.08  |
| With EC                          | 0.33 | 0.20 | 0.22 | 0.02  | 0.27 | N/A  | 0.001 | 0.01  | N/A  | 0.02  | 0.001 |
| With ECs                         | 0.31 | 0.04 | 0.19 | 0.02  | 0.12 | N/A  | 0.01  | 0.01  | 0.08 | N/A   | 0.01  |
| With ECe                         | 0.31 | 0.04 | 0.19 | 0.02  | 0.12 | N/A  | 0.01  | 0.01  | 0.09 | 0.07  | N/A   |
| With BT/ IEC                     | N/A  | 0.05 | 0.95 | 0.11  | 0.25 | N/A  | 0.03  | 0.03  | 0.03 | 0.03  | 0.03  |
| With FP/ IEC                     | 0.40 | N/A  | 0.26 | 0.14  | 0.25 | N/A  | 0.12  | 0.38  | 0.88 | 0.37  | 0.37  |
| With LP/ IEC                     | 0.46 | 0.05 | N/A  | 0.01  | 0.21 | N/A  | 0.30  | 0.37  | 0.42 | 0.38  | 0.38  |
| With LL/ IEC                     | 0.22 | 0.07 | 0.19 | N/A   | 0.21 | N/A  | 0.12  | 0.17  | 0.19 | 0.17  | 0.17  |
| With ST/ IEC                     | 0.12 | 0.03 | 0.01 | 0.01  | N/A  | N/A  | 0.01  | 0.02  | 0.01 | 0.01  | 0.01  |
| With KP/ IEC                     | 0.32 | 0.13 | 0.30 | 0.11  | 0.22 | N/A  | N/A   | 0.15  | 0.19 | 0.16  | 0.16  |
| With STy/ IEC                    | 0.34 | 0.07 | 0.37 | 0.02  | 0.21 | N/A  | 0.01  | N/A   | 0.20 | 0.17  | 0.17  |
| With EC/ IEC                     | 0.38 | 0.22 | 0.42 | 0.02  | 0.27 | N/A  | 0.001 | 0.01  | N/A  | 0.02  | 0.001 |
| With ECs/ IEC                    | 0.36 | 0.05 | 0.38 | 0.02  | 0.23 | N/A  | 0.001 | 0.004 | 0.17 | N/A   | 0.16  |
| With ECe/ IEC                    | 0.36 | 0.05 | 0.38 | 0.02  | 0.23 | N/A  | 0.001 | 0.004 | 0.19 | 0.001 | N/A   |
| Scenario                         | BT   | FP   | LP   | LL    | ST   | HP   | KP    | STy   | EC   | ECs   | ECe   |
| <b>Western diet, with oxygen</b> |      |      |      |       |      |      |       |       |      |       |       |
| Single                           | 0.44 | 0.17 | 0.47 | 0.11  | 0.09 | 0.20 | 0.51  | 0.43  | 0.49 | 0.49  | 0.49  |
| With IEC                         | 0.45 | 0.25 | 0.70 | 0.21  | 0.39 | 0.34 | 0.51  | 0.55  | 0.60 | 0.51  | 0.51  |
| With BT                          | N/A  | 0.22 | 0.79 | 0.33  | 0.24 | 0.46 | 0.57  | 0.19  | 0.52 | 0.52  | 0.52  |
| With FP                          | 0.28 | N/A  | 0.66 | 0.12  | 0.15 | 0.25 | 0.53  | 0.16  | 0.48 | 0.48  | 0.48  |

| Scenario                            | BT    | FP    | LP   | LL    | ST   | HP    | KP   | STy   | EC    | ECs   | ECe   |
|-------------------------------------|-------|-------|------|-------|------|-------|------|-------|-------|-------|-------|
| With LP                             | 0.08  | 0.04  | N/A  | 0.01  | 0.26 | 0.13  | 0.17 | 0.17  | 0.08  | 0.08  | 0.08  |
| With LL                             | 0.24  | 0.14  | 0.52 | N/A   | 0.22 | 0.07  | 0.10 | 0.22  | 0.09  | 0.11  | 0.11  |
| With ST                             | 0.35  | 0.09  | 0.27 | 0.02  | N/A  | 0.31  | 0.44 | 0.31  | 0.28  | 0.29  | 0.29  |
| With HP                             | 0.04  | 0.18  | 0.50 | 0.32  | 0.09 | N/A   | 0.53 | 0.01  | 0.48  | 0.48  | 0.48  |
| With KP                             | 0.01  | 0.01  | 0.70 | 0.55  | 0.17 | 0.01  | N/A  | 0.01  | 0.01  | 0.01  | 0.01  |
| With STy                            | 0.31  | 0.30  | 0.60 | 0.33  | 0.22 | 0.45  | 0.56 | N/A   | 0.48  | 0.48  | 0.48  |
| With EC                             | 0.01  | 0.01  | 0.79 | 0.52  | 0.36 | 0.01  | 0.57 | 0.01  | N/A   | 0.05  | 0.24  |
| With ECs                            | 0.01  | 0.01  | 0.78 | 0.49  | 0.34 | 0.01  | 0.57 | 0.01  | 0.43  | N/A   | 0.24  |
| With ECe                            | 0.01  | 0.01  | 0.78 | 0.49  | 0.34 | 0.01  | 0.57 | 0.01  | 0.25  | 0.25  | N/A   |
| With BT/ IEC                        | N/A   | 0.12  | 0.84 | 0.43  | 0.36 | 0.46  | 0.66 | 0.29  | 0.60  | 0.60  | 0.60  |
| With FP/ IEC                        | 0.44  | N/A   | 0.74 | 0.16  | 0.45 | 0.21  | 0.55 | 0.22  | 0.60  | 0.51  | 0.51  |
| With LP/ IEC                        | 0.05  | 0.05  | N/A  | 0.002 | 0.51 | 0.02  | 0.06 | 0.11  | 0.08  | 0.04  | 0.04  |
| With LL/ IEC                        | 0.15  | 0.15  | 0.72 | N/A   | 0.45 | 0.02  | 0.07 | 0.22  | 0.11  | 0.07  | 0.07  |
| With ST/ IEC                        | 0.27  | 0.03  | 0.29 | 0.02  | N/A  | 0.20  | 0.24 | 0.36  | 0.31  | 0.18  | 0.18  |
| With HP/ IEC                        | 0.02  | 0.25  | 0.72 | 0.36  | 0.46 | N/A   | 0.54 | 0.05  | 0.60  | 0.51  | 0.51  |
| With KP/ IEC                        | 0.002 | 0.001 | 0.84 | 0.57  | 0.49 | 0.001 | N/A  | 0.001 | 0.001 | 0.001 | 0.001 |
| With STy/ IEC                       | 0.28  | 0.35  | 0.88 | 0.45  | 0.34 | 0.52  | 0.65 | N/A   | 0.60  | 0.60  | 0.60  |
| With EC/ IEC                        | 0.001 | 0.001 | 0.94 | 0.63  | 0.53 | 0.001 | 0.65 | 0.001 | N/A   | 0.27  | 0.30  |
| With ECs/ IEC                       | 0.002 | 0.001 | 0.86 | 0.56  | 0.59 | 0.001 | 0.57 | 0.001 | 0.33  | N/A   | 0.26  |
| With ECe/ IEC                       | 0.002 | 0.001 | 0.86 | 0.56  | 0.59 | 0.001 | 0.57 | 0.001 | 0.30  | 0.26  | N/A   |
| Scenario                            | BT    | FP    | LP   | LL    | ST   | HP    | KP   | STy   | EC    | ECs   | ECe   |
| <b>High fiber diet, with oxygen</b> |       |       |      |       |      |       |      |       |       |       |       |
| Single                              | 0.44  | 0.08  | 0.26 | 0.04  | 0.02 | 0.13  | 0.44 | 0.33  | 0.49  | 0.49  | 0.49  |
| With IEC                            | 0.45  | 0.14  | 0.46 | 0.09  | 0.15 | 0.34  | 0.51 | 0.53  | 0.60  | 0.51  | 0.51  |
| With BT                             | N/A   | 0.49  | 0.93 | 0.60  | 0.76 | 0.46  | 0.57 | 0.19  | 0.52  | 0.52  | 0.52  |
| With FP                             | 0.01  | N/A   | 0.44 | 0.05  | 0.06 | 0.37  | 0.53 | 0.32  | 0.48  | 0.48  | 0.48  |
| With LP                             | 0.01  | 0.03  | N/A  | 0.01  | 0.13 | 0.21  | 0.33 | 0.26  | 0.12  | 0.13  | 0.13  |
| With LL                             | 0.05  | 0.08  | 0.29 | N/A   | 0.08 | 0.19  | 0.29 | 0.35  | 0.23  | 0.32  | 0.32  |
| With ST                             | 0.09  | 0.04  | 0.15 | 0.01  | N/A  | 0.16  | 0.42 | 0.33  | 0.44  | 0.44  | 0.44  |
| With HP                             | 0.04  | 0.01  | 0.21 | 0.19  | 0.04 | N/A   | 0.07 | 0.21  | 0.48  | 0.48  | 0.48  |
| With KP                             | 0.01  | 0.01  | 0.45 | 0.29  | 0.04 | 0.40  | N/A  | 0.40  | 0.01  | 0.05  | 0.05  |
| With STy                            | 0.31  | 0.13  | 0.26 | 0.01  | 0.01 | 0.24  | 0.07 | N/A   | 0.48  | 0.48  | 0.48  |
| With EC                             | 0.01  | 0.01  | 0.71 | 0.34  | 0.08 | 0.01  | 0.57 | 0.01  | N/A   | 0.24  | 0.24  |
| With ECs                            | 0.01  | 0.01  | 0.69 | 0.23  | 0.08 | 0.01  | 0.53 | 0.01  | 0.25  |       | 0.24  |
| With ECe                            | 0.01  | 0.01  | 0.69 | 0.23  | 0.08 | 0.01  | 0.53 | 0.01  | 0.25  | 0.24  |       |
| With BT/ IEC                        | N/A   | 0.53  | 0.93 | 0.60  | 0.85 | 0.46  | 0.66 | 0.29  | 0.60  | 0.60  | 0.60  |
| With FP/ IEC                        | 0.04  | N/A   | 0.56 | 0.10  | 0.22 | 0.35  | 0.55 | 0.40  | 0.60  | 0.51  | 0.51  |
| With LP/ IEC                        | 0.01  | 0.02  |      | 0.003 | 0.22 | 0.13  | 0.18 | 0.28  | 0.18  | 0.10  | 0.10  |
| With LL/ IEC                        | 0.04  | 0.08  | 0.48 | N/A   | 0.20 | 0.07  | 0.10 | 0.48  | 0.45  | 0.16  | 0.16  |
| With ST/ IEC                        | 0.03  | 0.02  | 0.28 | 0.01  | N/A  | 0.38  | 0.46 | 0.46  | 0.49  | 0.37  | 0.37  |

| Scenario                         | BT    | FP    | LP   | LL   | ST   | HP    | KP   | STy   | EC   | ECs   | ECe   |
|----------------------------------|-------|-------|------|------|------|-------|------|-------|------|-------|-------|
| With HP/ IEC                     | 0.02  | 0.12  | 0.47 | 0.31 | 0.14 | N/A   | 0.54 | 0.09  | 0.60 | 0.51  | 0.51  |
| With KP/ IEC                     | 0.002 | 0.001 | 0.65 | 0.53 | 0.13 | 0.001 | N/A  | 0.22  | 0.08 | 0.001 | 0.001 |
| With STy/ IEC                    | 0.28  | 0.17  | 0.50 | 0.06 | 0.10 | 0.48  | 0.36 | N/A   | 0.60 | 0.60  | 0.60  |
| With EC/ IEC                     | 0.001 | 0.001 | 0.77 | 0.19 | 0.18 | 0.001 | 0.56 | 0.001 | N/A  | 0.30  | 0.26  |
| With ECs/ IEC                    | 0.002 | 0.001 | 0.75 | 0.45 | 0.25 | 0.001 | 0.57 | 0.002 | 0.30 | N/A   | 0.26  |
| With ECe/ IEC                    | 0.002 | 0.001 | 0.75 | 0.45 | 0.25 | 0.001 | 0.57 | 0.002 | 0.33 | 0.26  | N/A   |
| Scenario                         | BT    | FP    | LP   | LL   | ST   | HP    | KP   | STy   | EC   | ECs   | ECe   |
| <b>Protein diet, with oxygen</b> |       |       |      |      |      |       |      |       |      |       |       |
| Single                           | 0.58  | 0.12  | 0.42 | 0.07 | 0.06 | 0.26  | 0.55 | 0.53  | 0.69 | 0.67  | 0.67  |
| With IEC                         | 0.63  | 0.19  | 0.62 | 0.14 | 0.26 | 0.61  | 0.69 | 0.71  | 0.82 | 0.79  | 0.79  |
| With BT                          | N/A   | 0.04  | 0.89 | 0.25 | 0.25 | 0.93  | 0.56 | 0.71  | 0.58 | 0.69  | 0.69  |
| With FP                          | 0.59  | N/A   | 0.58 | 0.09 | 0.12 | 0.60  | 0.62 | 0.66  | 0.93 | 0.80  | 0.80  |
| With LP                          | 0.50  | 0.03  | N/A  | 0.01 | 0.28 | 0.39  | 0.63 | 0.48  | 0.53 | 0.55  | 0.55  |
| With LL                          | 0.40  | 0.10  | 0.46 | N/A  | 0.15 | 0.34  | 0.40 | 0.55  | 0.69 | 0.67  | 0.67  |
| With ST                          | 0.40  | 0.06  | 0.19 | 0.01 | N/A  | 0.36  | 0.50 | 0.49  | 0.64 | 0.62  | 0.62  |
| With HP                          | 0.07  | 0.02  | 0.39 | 0.34 | 0.09 | N/A   | 0.08 | 0.41  | 0.05 | 0.05  | 0.05  |
| With KP                          | 0.21  | 0.03  | 0.63 | 0.40 | 0.08 | 0.56  | N/A  | 0.53  | 0.65 | 0.63  | 0.63  |
| With STy                         | 0.10  | 0.03  | 0.48 | 0.02 | 0.06 | 0.41  | 0.08 | N/A   | 0.70 | 0.67  | 0.67  |
| With EC                          | 0.32  | 0.04  | 0.89 | 0.02 | 0.07 | 0.76  | 0.09 | 0.01  | N/A  | 0.01  | 0.08  |
| With ECs                         | 0.18  | 0.02  | 0.85 | 0.02 | 0.07 | 0.73  | 0.09 | 0.01  | 0.68 | N/A   | 0.22  |
| With ECe                         | 0.18  | 0.02  | 0.85 | 0.02 | 0.07 | 0.73  | 0.09 | 0.01  | 0.61 | 0.45  | N/A   |
| With BT/ IEC                     | N/A   | 0.04  | 1.08 | 0.31 | 0.30 | 0.93  | 0.68 | 0.75  | 0.51 | 0.70  | 0.70  |
| With FP/ IEC                     | 0.69  | N/A   | 0.67 | 0.13 | 0.33 | 0.73  | 0.68 | 0.77  | 1.04 | 0.88  | 0.88  |
| With LP/ IEC                     | 0.40  | 0.03  | N/A  | 0.01 | 0.46 | 0.39  | 0.68 | 0.64  | 0.57 | 0.51  | 0.51  |
| With LL/ IEC                     | 0.42  | 0.12  | 0.62 | N/A  | 0.33 | 0.28  | 0.50 | 0.69  | 0.81 | 0.79  | 0.79  |
| With ST/ IEC                     | 0.42  | 0.03  | 0.24 | 0.02 | N/A  | 0.76  | 0.57 | 0.61  | 0.70 | 0.68  | 0.68  |
| With HP/ IEC                     | 0.06  | 0.01  | 0.67 | 0.47 | 0.23 | N/A   | 0.09 | 0.31  | 0.05 | 0.05  | 0.05  |
| With KP/ IEC                     | 0.15  | 0.06  | 0.82 | 0.50 | 0.18 | 0.73  | N/A  | 0.66  | 0.77 | 0.75  | 0.75  |
| With STy/ IEC                    | 0.13  | 0.05  | 0.79 | 0.03 | 0.14 | 0.72  | 0.10 | N/A   | 0.83 | 0.80  | 0.80  |
| With EC/ IEC                     | 0.46  | 0.07  | 1.00 | 0.04 | 0.17 | 0.90  | 0.09 | 0.01  | N/A  | 0.02  | 0.001 |
| With ECs/ IEC                    | 0.23  | 0.03  | 0.98 | 0.03 | 0.16 | 0.87  | 0.09 | 0.002 | 0.80 | N/A   | 0.26  |
| With ECe/ IEC                    | 0.23  | 0.03  | 0.98 | 0.03 | 0.16 | 0.87  | 0.09 | 0.002 | 0.82 | 0.53  | N/A   |

**Table S6:** Description of the ten recurring metabolite exchanges between pairs predicted for the microbe-microbe pairs, and occurrence by pair. Pairs that did not display any reoccurring exchanges are not shown.

- i) pyruvate/ D-lactate shuttling coupled to NAD<sup>+</sup>/NADH interconversion
- ii) ethanol/ acetaldehyde shuttling coupled to NAD<sup>+</sup>/NADH interconversion
- iii) L-alanine/ L-lactate exchange with pyruvate as an intermediate
- iv) fumarate/ succinate exchange depending on quinol and NAD<sup>+</sup>/NADH
- v) succinate/ malate exchange depending on quinol and FAD/ FADH<sub>2</sub> or NAD<sup>+</sup>/NADH
- vi) glutamate/ citrate exchange depending on transamination
- vii) acetate/ butyrate exchange depending on acetyl-CoA and butyryl-CoA
- viii) acetate/ dihydroxyacetone exchange via pyruvate and acetyl-CoA as intermediates
- ix) threonine/ glycine interconversion via acetaldehyde
- x) 2,3-butandiol/ diacetyl interconversion via R-acetoin

| Pair  | # scenarios containing crossfeeding exchanges per pair |                            |                            |                          |                       |                         |                         |                                  |                         |                             |                      |
|-------|--------------------------------------------------------|----------------------------|----------------------------|--------------------------|-----------------------|-------------------------|-------------------------|----------------------------------|-------------------------|-----------------------------|----------------------|
|       | (i) Pyruvate/ D-lactate                                | (ii) Acetaldehyde/ Ethanol | (iii) L-alanine/ L-lactate | (iv) Fumarate/ Succinate | (v) Malate/ Succinate | (vi) Citrate/ Glutamate | (vii) Acetate/ Butyrate | (viii) Acetate/ Dihydroxyacetone | (ix) Glycine/ Threonine | (x) 2,3-butandiol/ Diacetyl | Total # of scenarios |
| BTFP  |                                                        |                            |                            | 8                        |                       |                         |                         |                                  | 7                       |                             | 12                   |
| BTLP  | 8                                                      |                            | 8                          |                          |                       |                         |                         |                                  | 4                       |                             | 12                   |
| BTLL  |                                                        |                            | 1                          |                          |                       |                         |                         |                                  | 1                       |                             | 12                   |
| BTST  |                                                        |                            | 1                          |                          |                       |                         |                         |                                  |                         |                             | 12                   |
| BTSTy | 5                                                      |                            |                            |                          |                       |                         |                         |                                  |                         |                             | 12                   |
| BTEC  | 1                                                      |                            |                            | 2                        |                       |                         |                         |                                  |                         |                             | 12                   |
| BTECs | 1                                                      |                            |                            | 2                        |                       |                         |                         |                                  |                         |                             | 12                   |
| BTECe | 1                                                      |                            |                            | 2                        |                       |                         |                         |                                  |                         |                             | 12                   |
| FPLP  |                                                        |                            |                            |                          | 12                    |                         |                         |                                  | 9                       |                             | 12                   |
| FPLL  |                                                        |                            |                            |                          |                       |                         |                         |                                  | 1                       |                             | 12                   |
| FPST  |                                                        |                            |                            |                          |                       | 12                      |                         |                                  |                         |                             | 12                   |
| FPKP  |                                                        |                            |                            |                          | 2                     | 1                       |                         |                                  |                         |                             | 12                   |
| FPSTy |                                                        |                            |                            | 6                        |                       | 7                       |                         |                                  |                         |                             | 12                   |
| FPEC  |                                                        |                            |                            | 8                        |                       | 8                       | 7                       |                                  |                         |                             | 12                   |
| FPECs |                                                        |                            |                            | 8                        |                       | 8                       |                         |                                  |                         |                             | 12                   |



**Table S7:** Co-occurrences of the ten metabolite exchanges described in Table S6 in all 600 pairs grouped by type of interaction. Co-occurring exchanges that were not computed in any pairs are not shown.

| Exchange co-occurrences summed up for predicted interactions | Parasitism (n=299) | Commensalism (n=22) | Neutralism (n=1) | Amensalism (n=175) | Competition (n=66) | Mutualism (n=37) |
|--------------------------------------------------------------|--------------------|---------------------|------------------|--------------------|--------------------|------------------|
| Average # of exchange co-occurrences/ pair                   | 0.29               | 0.38                | 0                | 0.03               | 0.09               | 1.05             |
| Pyruvate/ D-lactate + Acetaldehyde/ Ethanol                  | 10                 | 4                   |                  | 2                  |                    | 29               |
| Pyruvate/ D-lactate + L-alanine/ L-lactate                   | 6                  |                     |                  |                    |                    | 1                |
| Pyruvate/ D-lactate + Fumarate/ Succinate                    | 2                  |                     |                  |                    |                    |                  |
| Pyruvate/ D-lactate + Glycine/ Threonine                     | 2                  |                     |                  |                    |                    | 1                |
| Acetaldehyde/ Ethanol + Fumarate/ Succinate                  | 8                  |                     |                  |                    |                    |                  |
| Acetaldehyde/ Ethanol + Malate/ Succinate                    | 3                  |                     |                  |                    |                    | 1                |
| Acetaldehyde/ Ethanol + 2,3-butandiol/ Diacetyl              | 6                  |                     |                  |                    | 6                  |                  |
| L-alanine/ L-lactate + Acetate/ Dihydroxyacetone             | 1                  |                     |                  |                    |                    |                  |
| L-alanine/ L-lactate + Glycine/ Threonine                    | 3                  |                     |                  |                    |                    | 1                |
| Fumarate/ Succinate + Citrate/ Glutamate                     | 26                 | 1                   |                  |                    |                    | 2                |
| Fumarate/ Succinate + Acetate/ Butyrate                      | 4                  | 1                   |                  |                    |                    | 2                |
| Fumarate/ Succinate + Glycine/ Threonine                     | 4                  | 1                   |                  |                    |                    |                  |
| Malate/ Succinate + Glycine/ Threonine                       | 7                  |                     |                  | 2                  |                    |                  |
| Citrate/ Glutamate + Acetate/ Butyrate                       | 4                  | 1                   |                  |                    |                    | 2                |
| Citrate/ Glutamate + Acetate/ Dihydroxyacetone               | 1                  |                     |                  | 1                  |                    |                  |

## Supplemental Figures

Figure S1: Pareto optimality analysis of all possible pairs in every scenario.

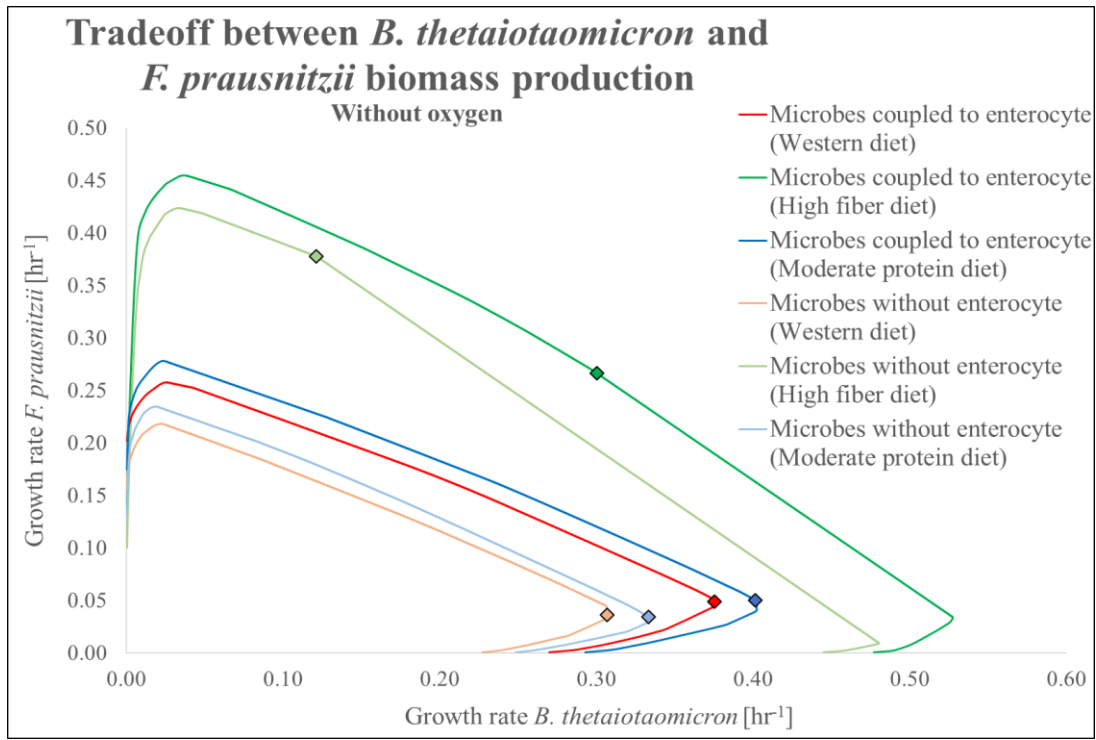

Figure S1.1

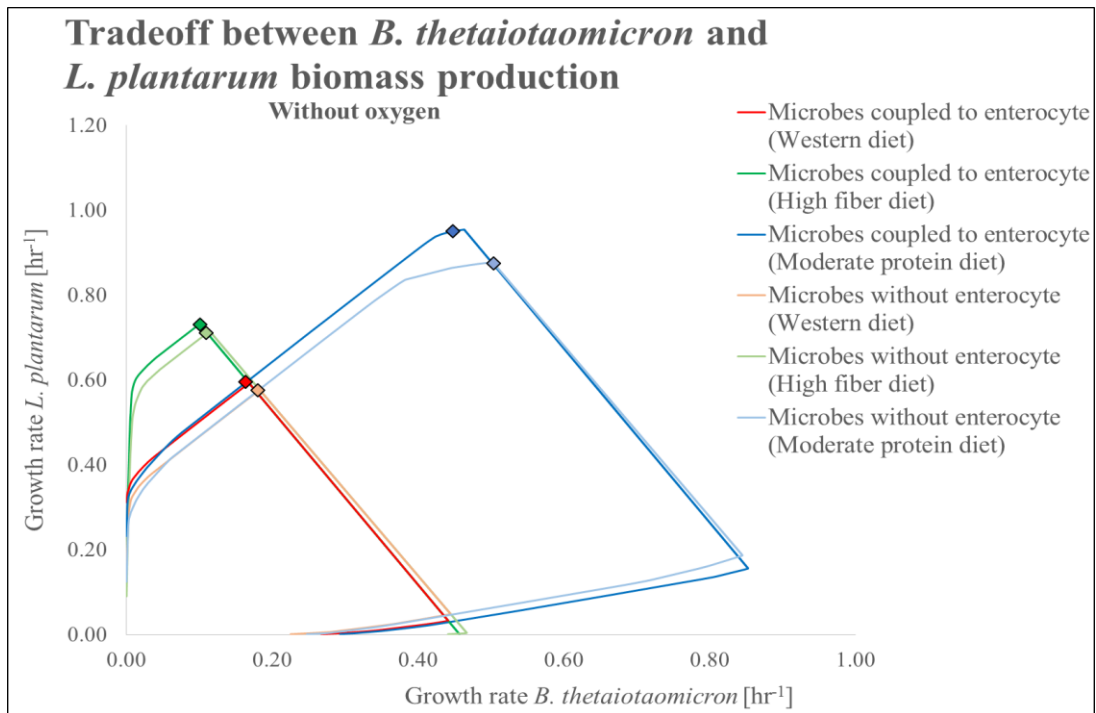

Figure S1.2

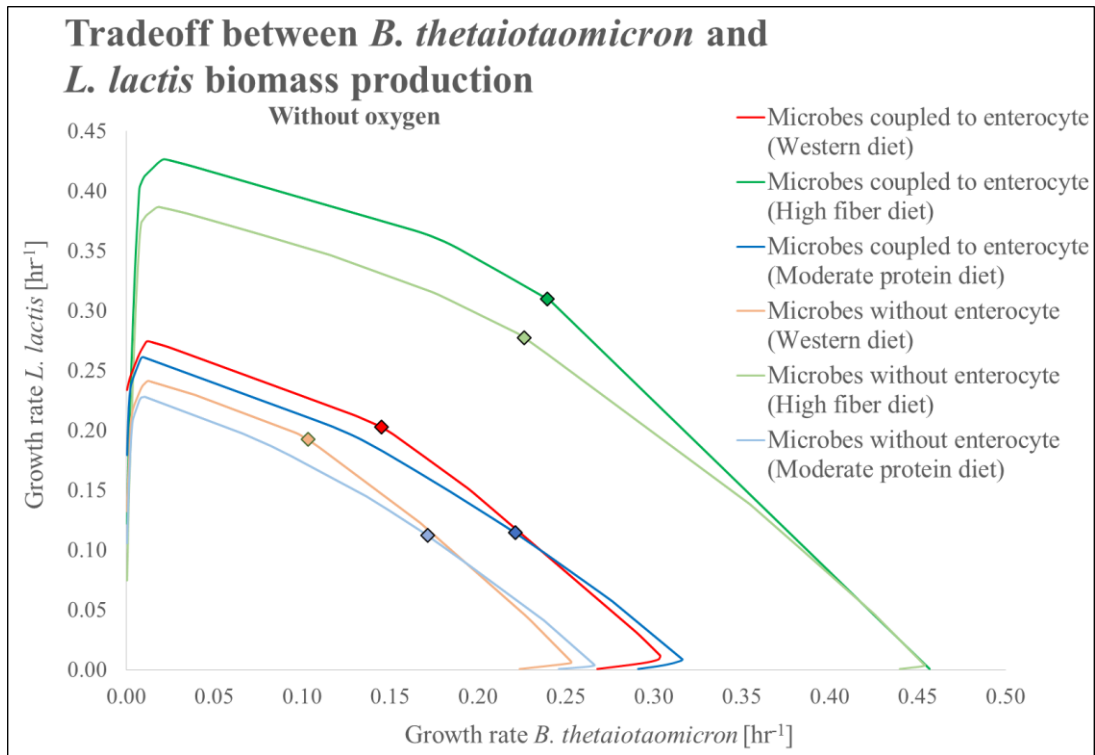

Figure S1.3

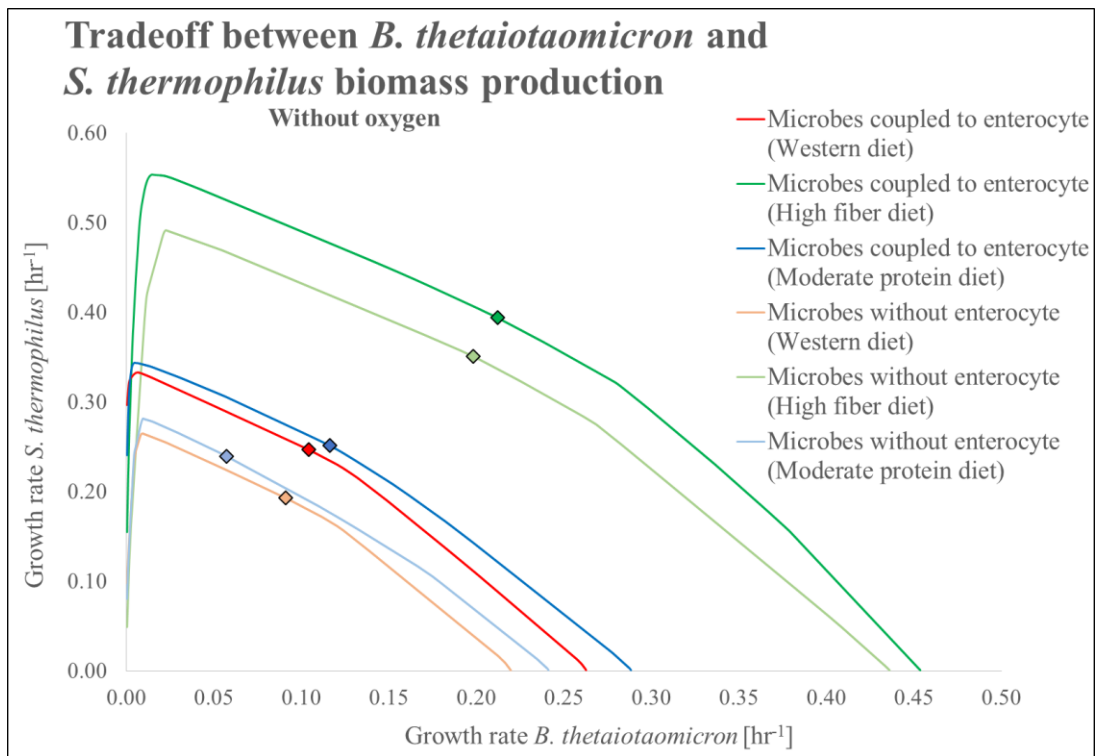

Figure S1.4



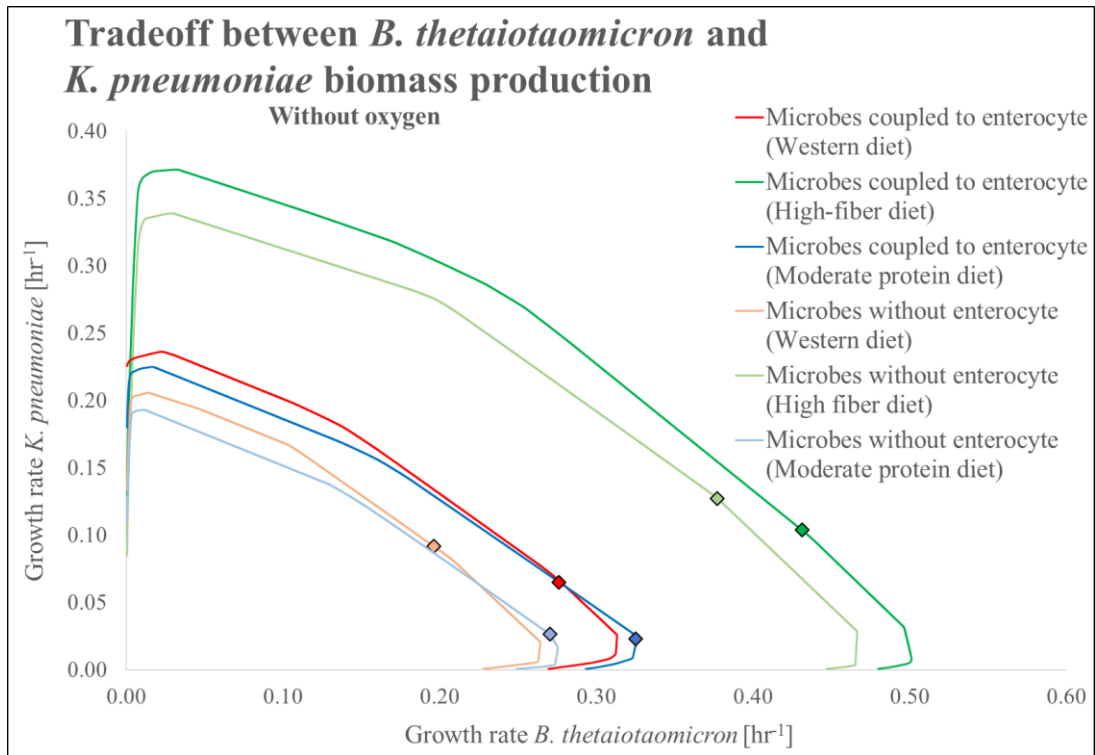

Figure S1.5

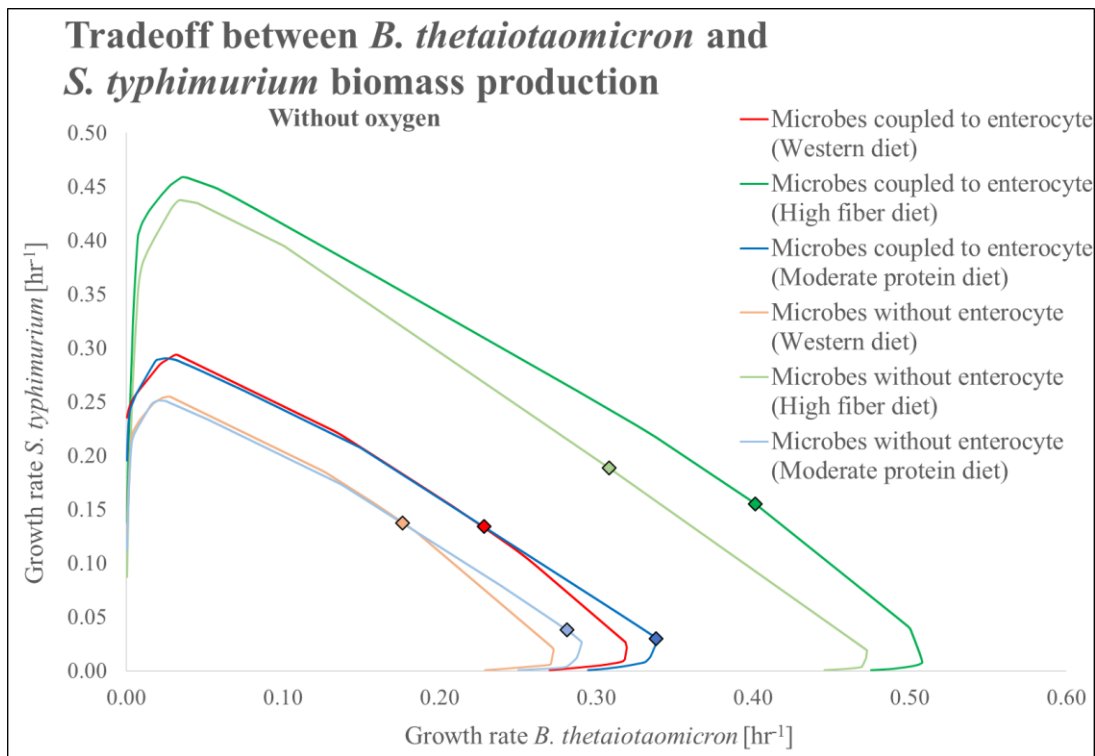

Figure S1.6

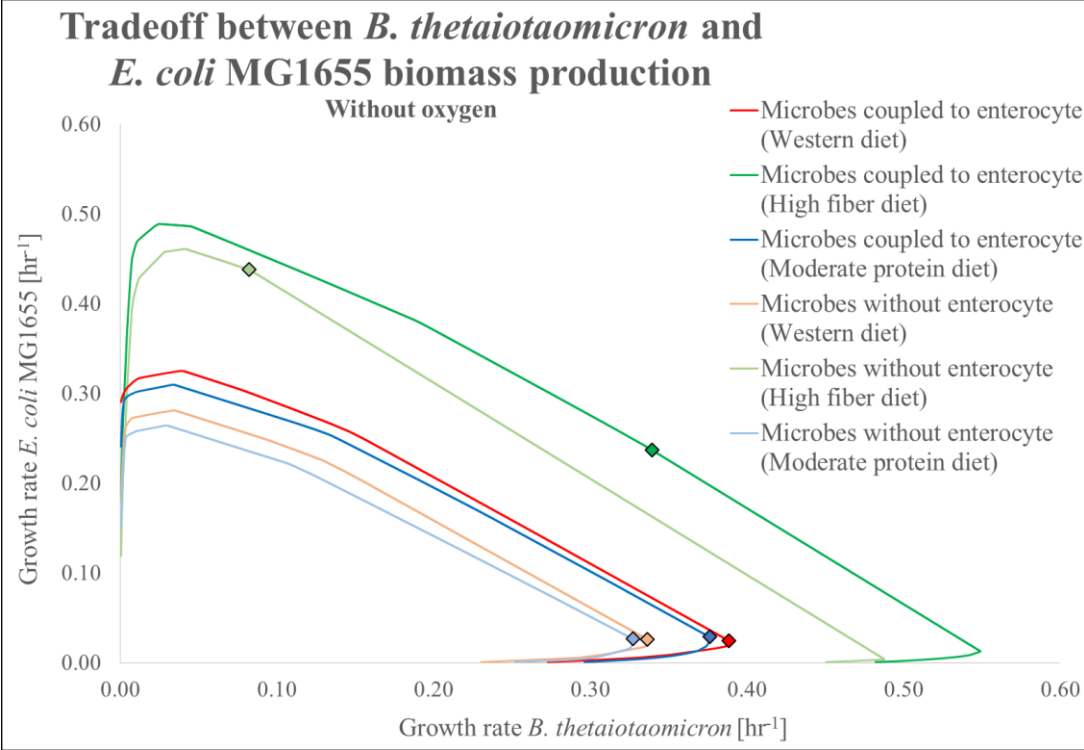

Figure S1.7

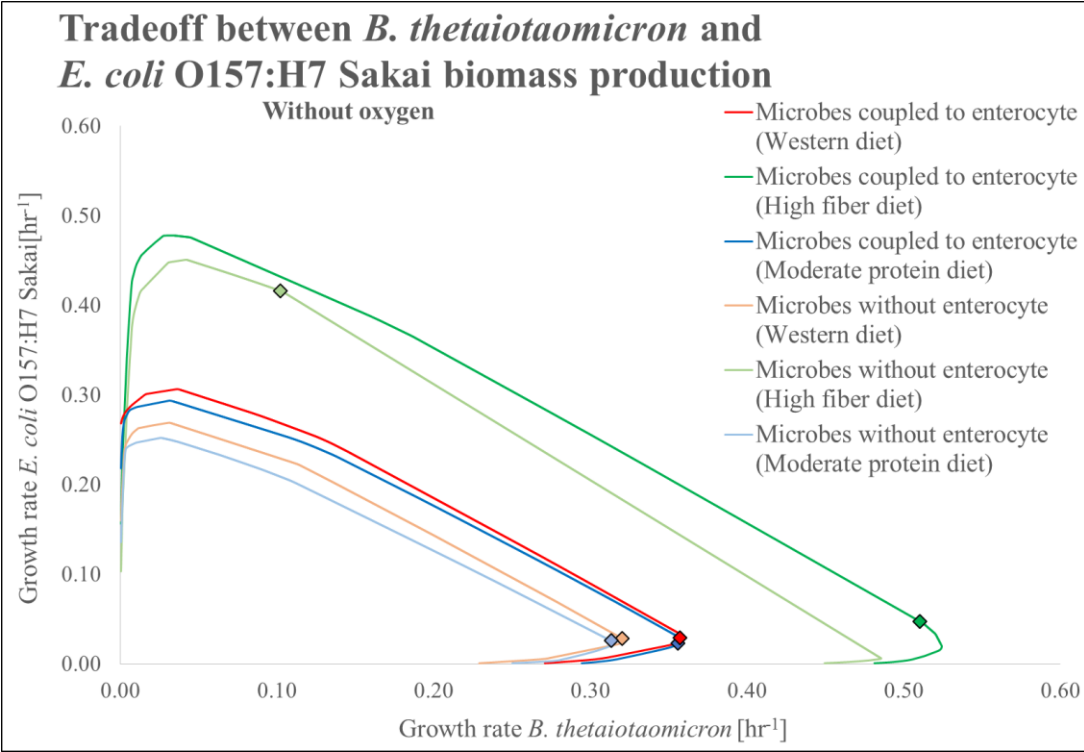

Figure S1.8

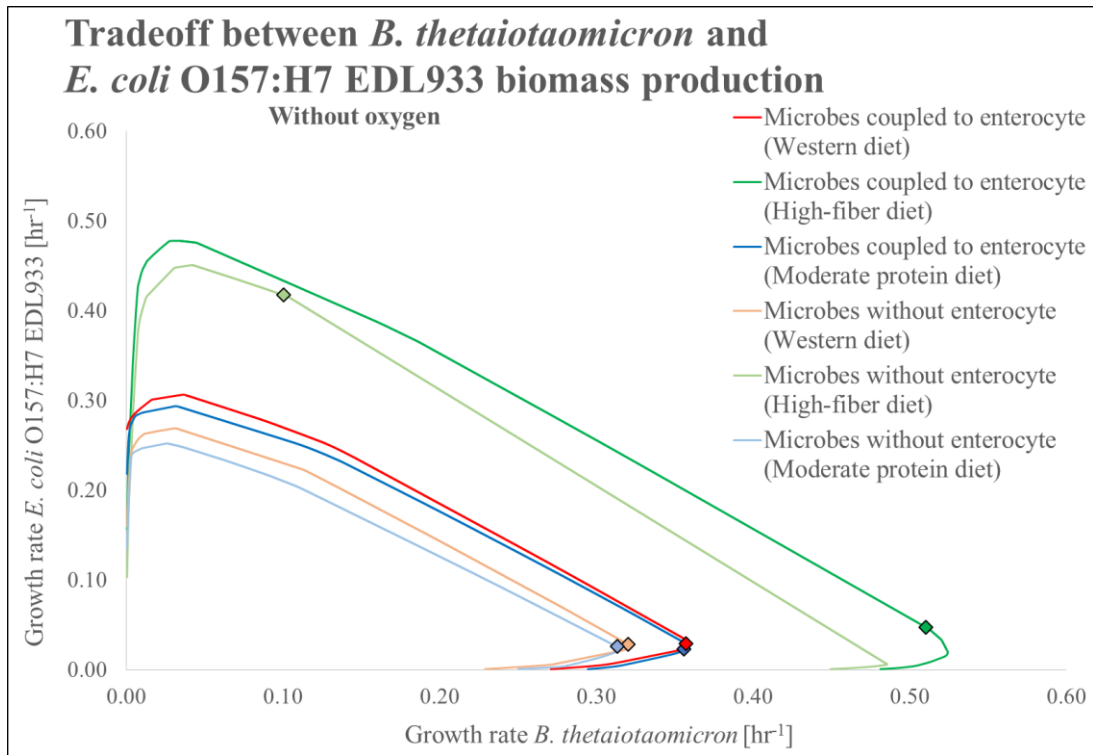

Figure S1.9

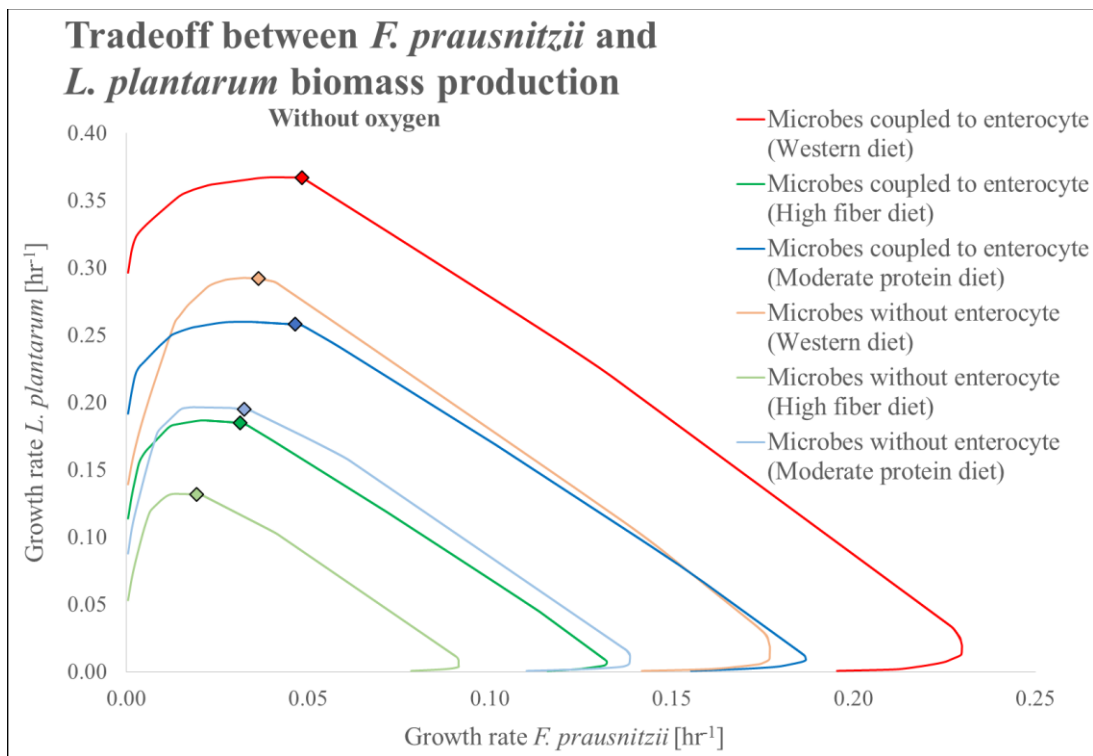

Figure S1.10

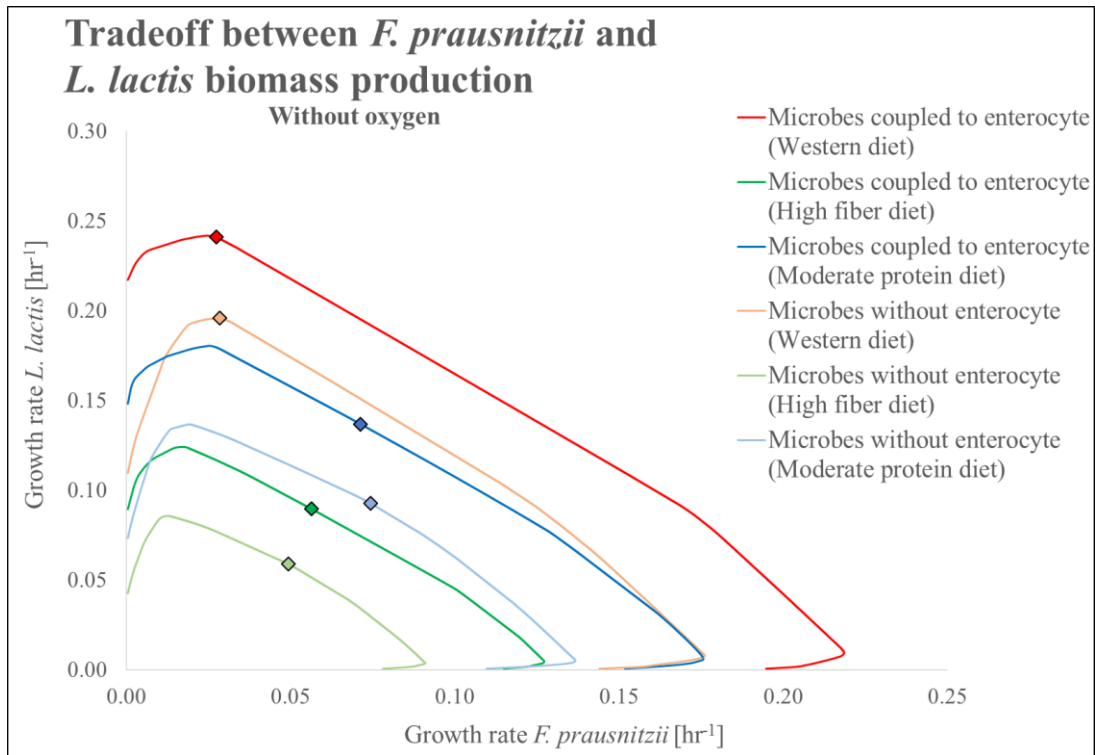

Figure S1.11

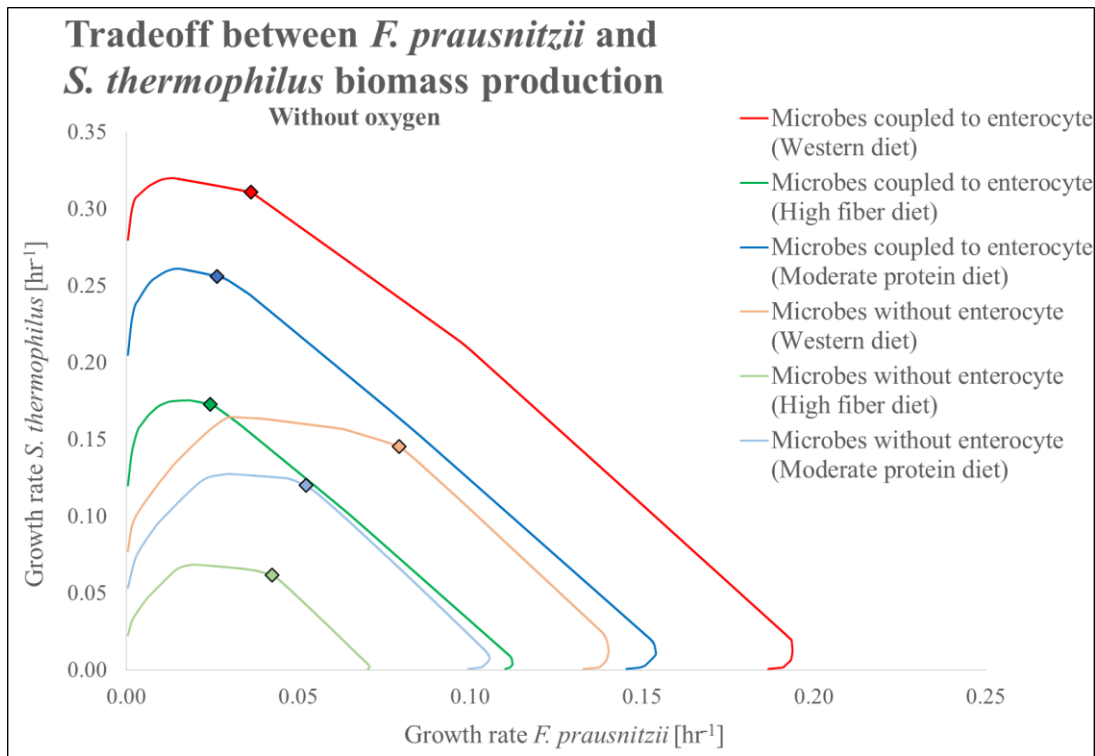

Figure S1.12

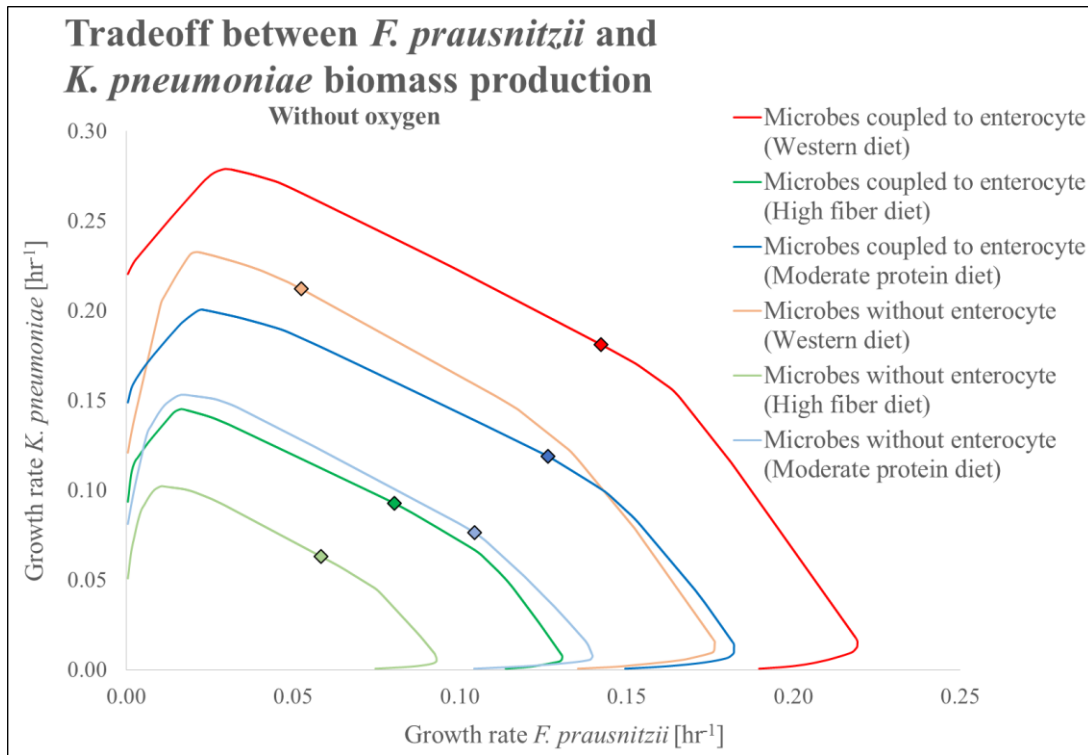

Figure S1.13

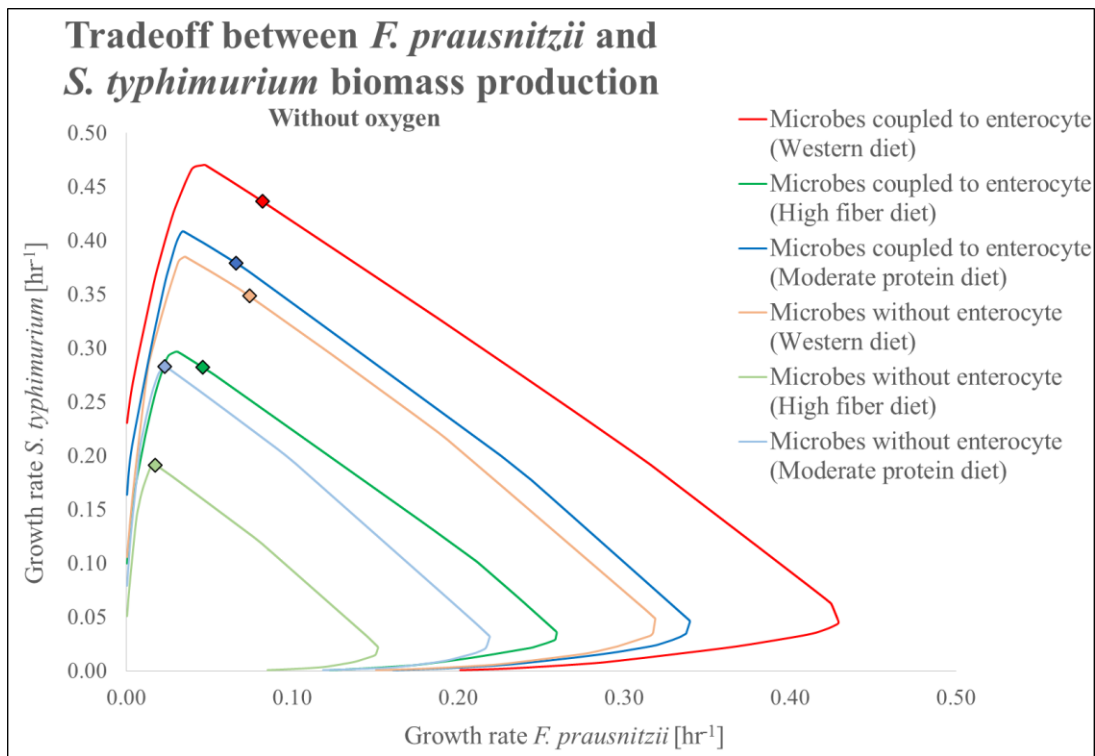

Figure S1.14

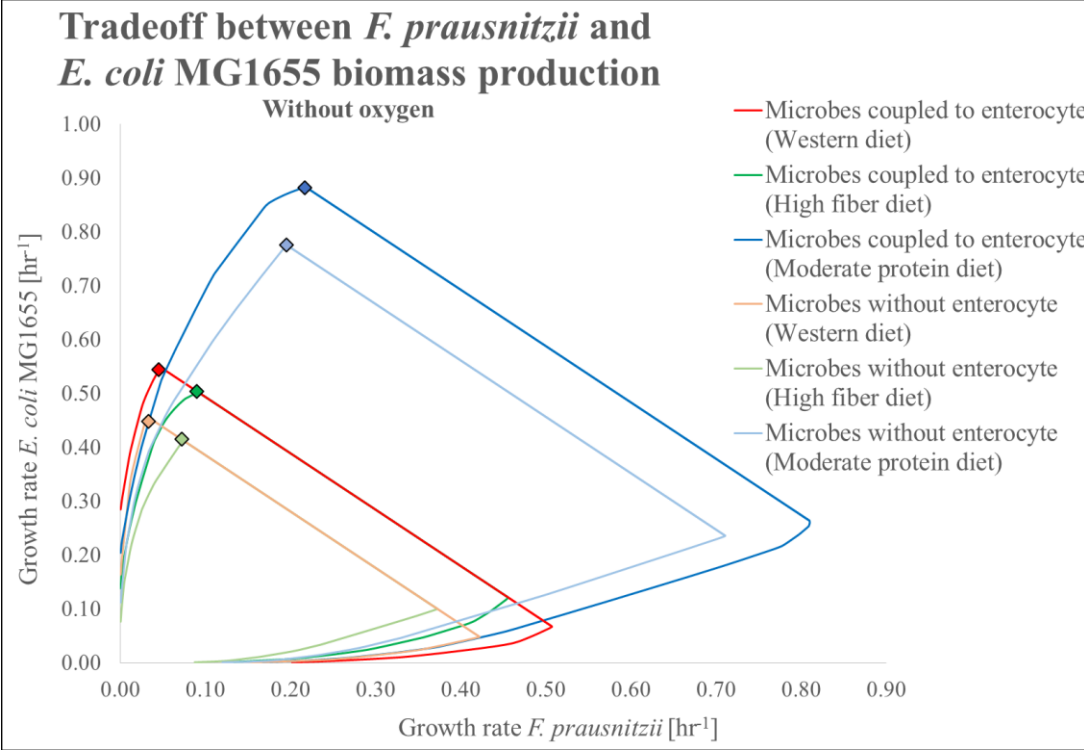

Figure S1.15

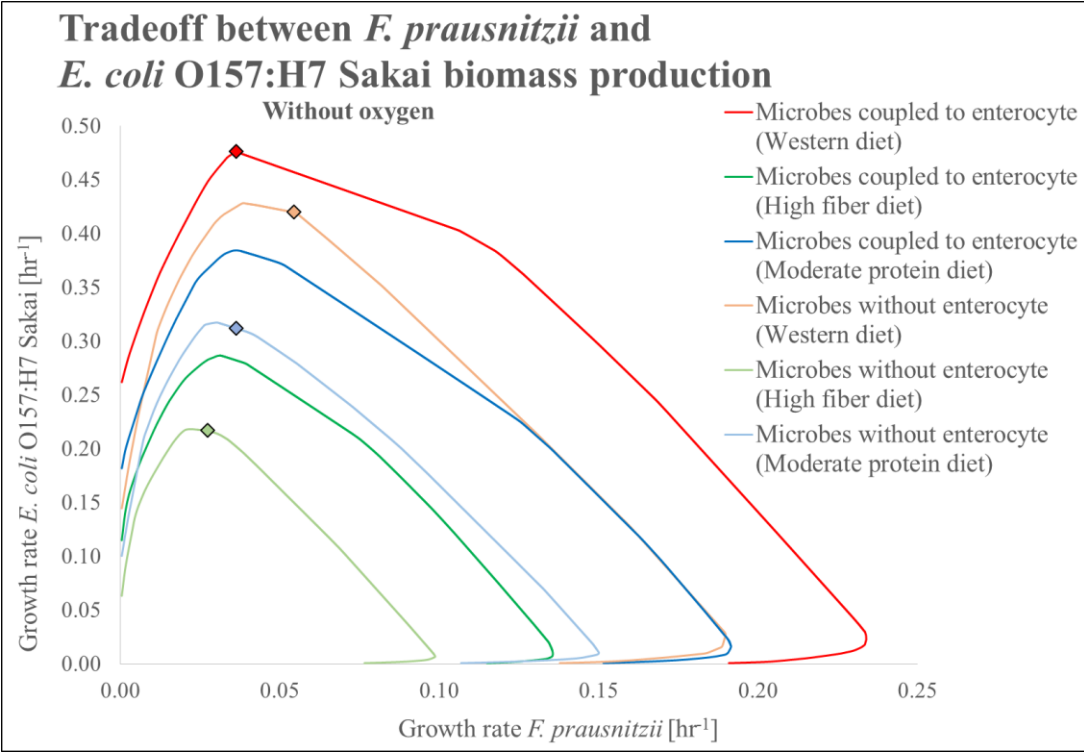

Figure S1.16

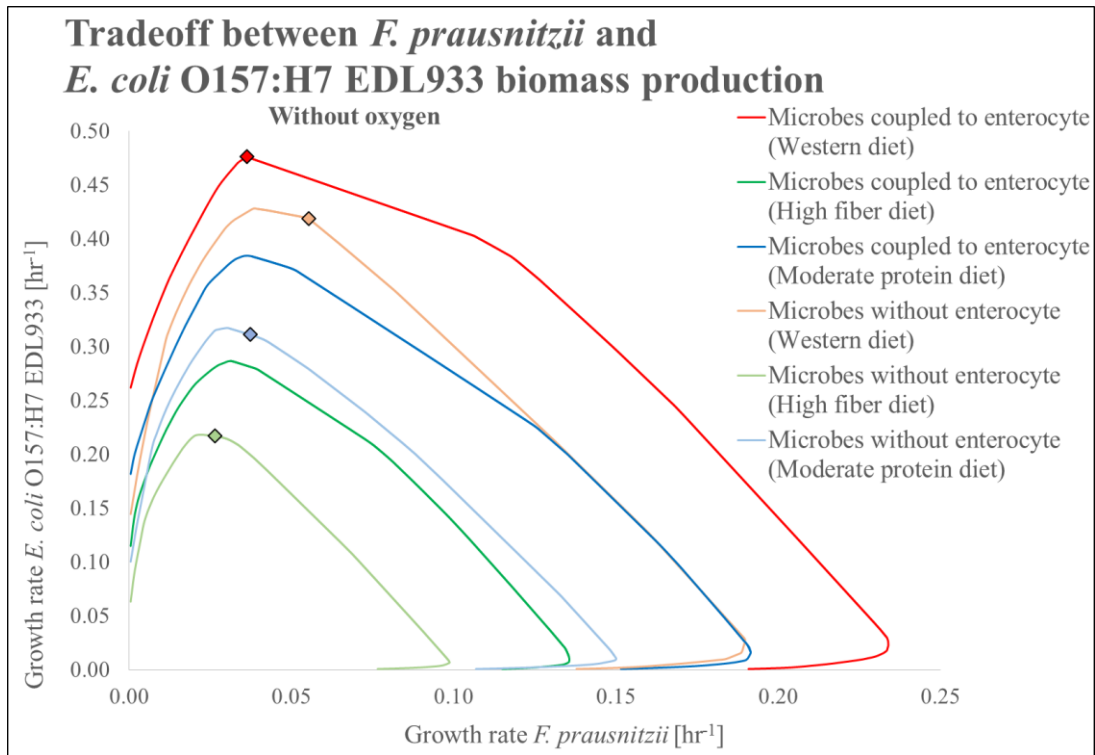

Figure S1.17

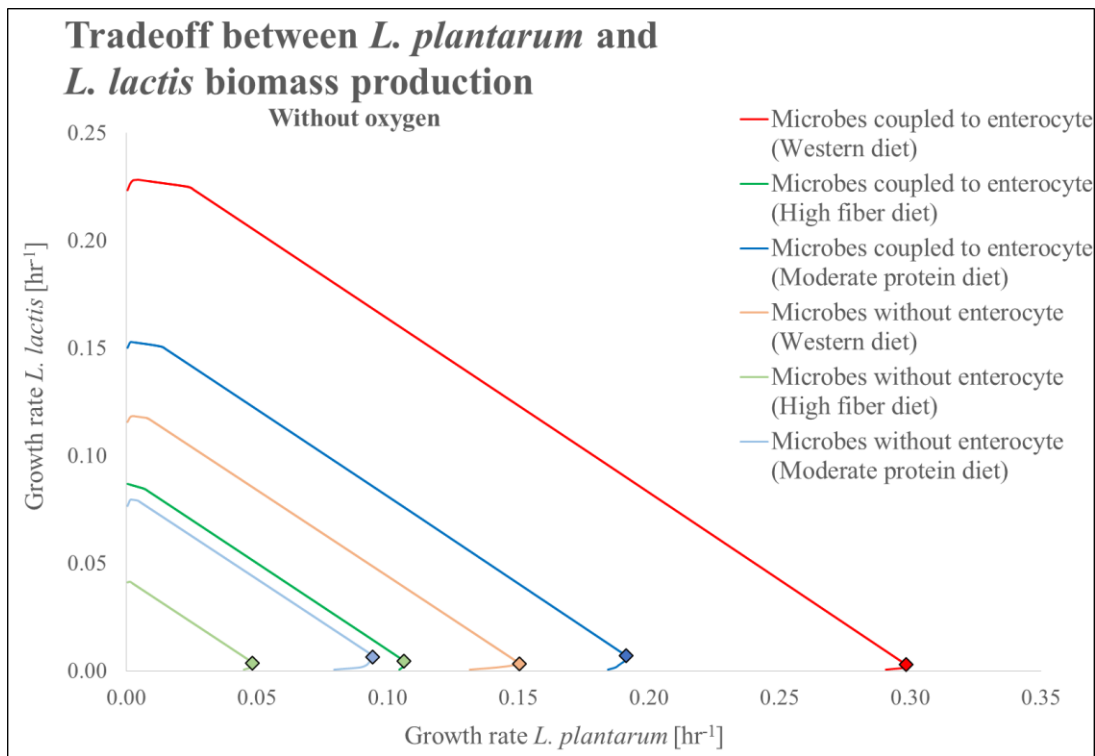

Figure S1.18

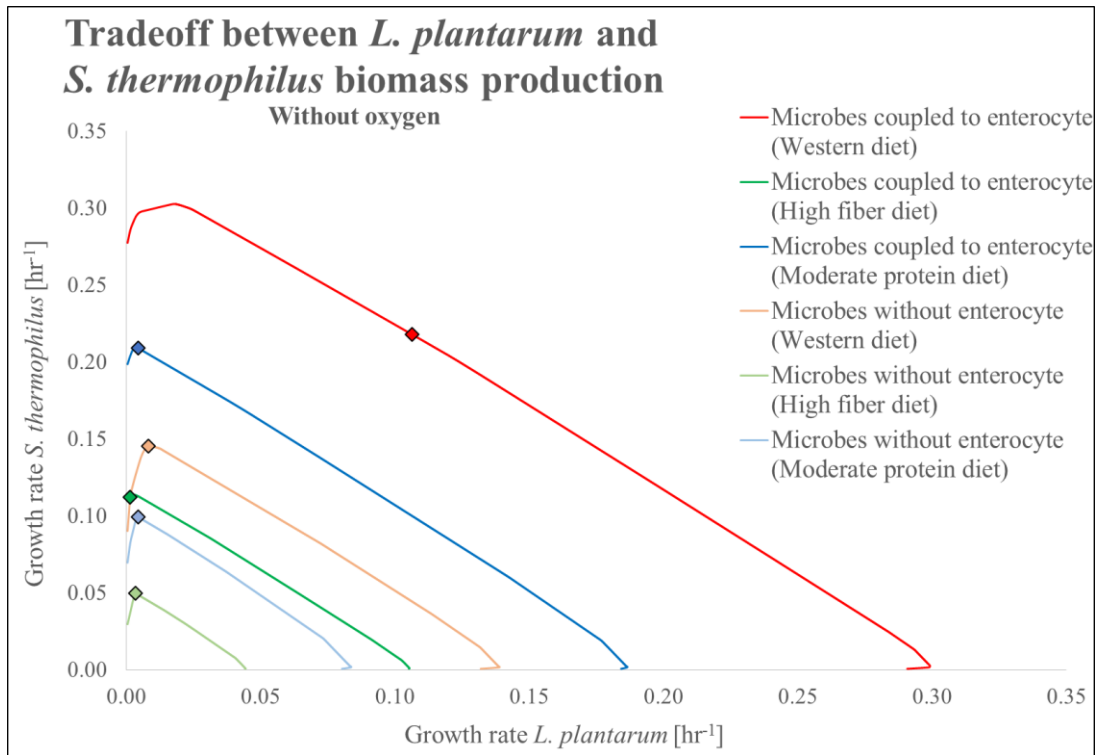

Figure S1.19

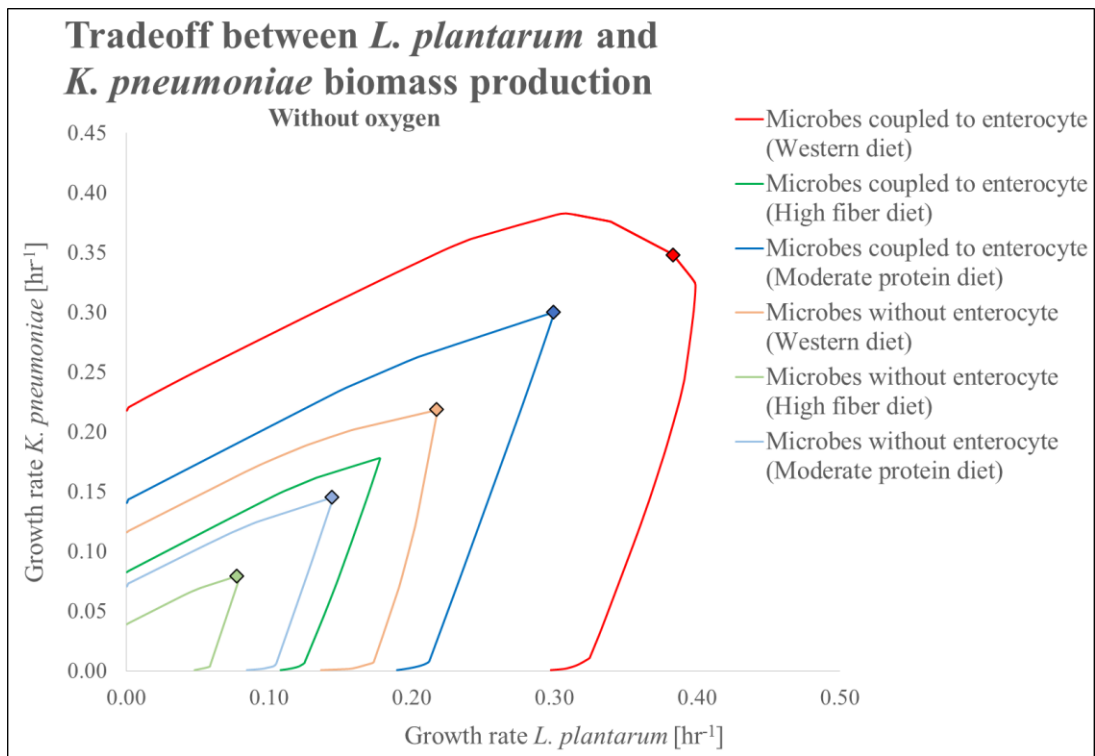

Figure S1.20



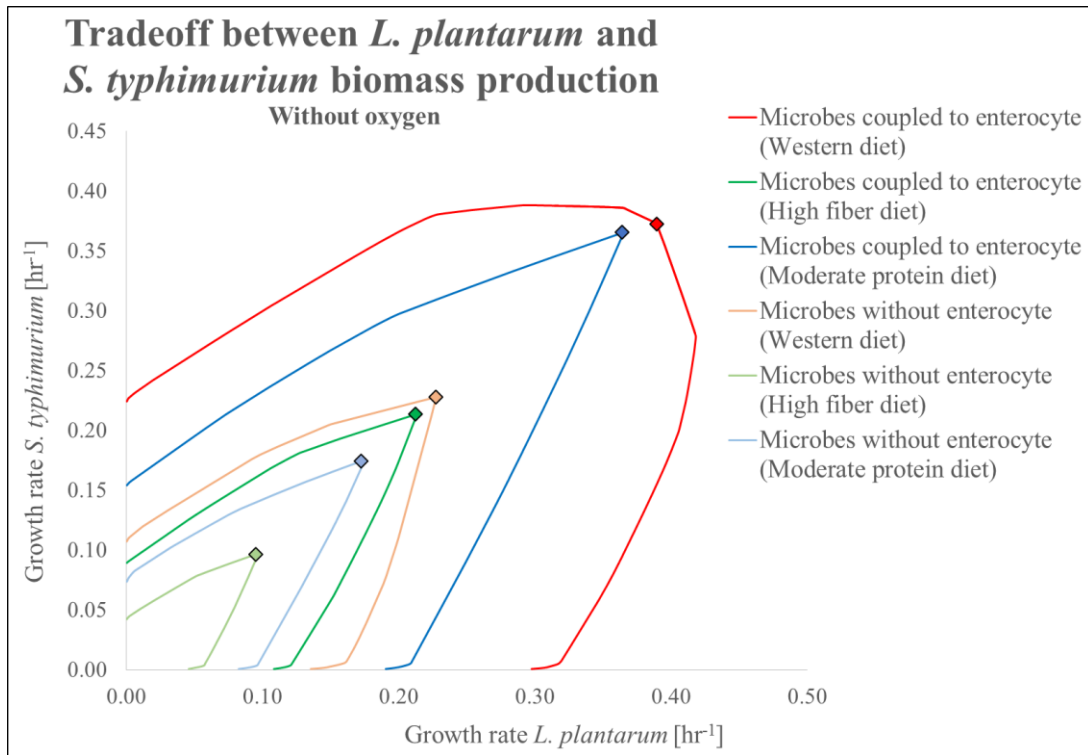

Figure S1.21

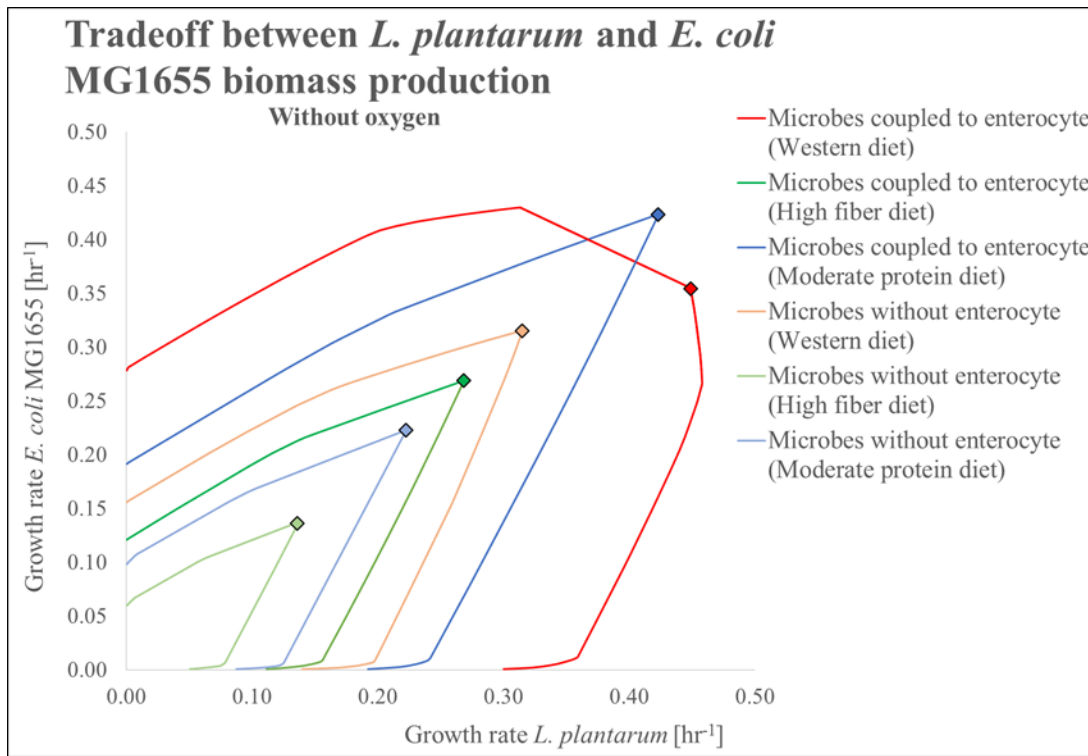

Figure S1.22

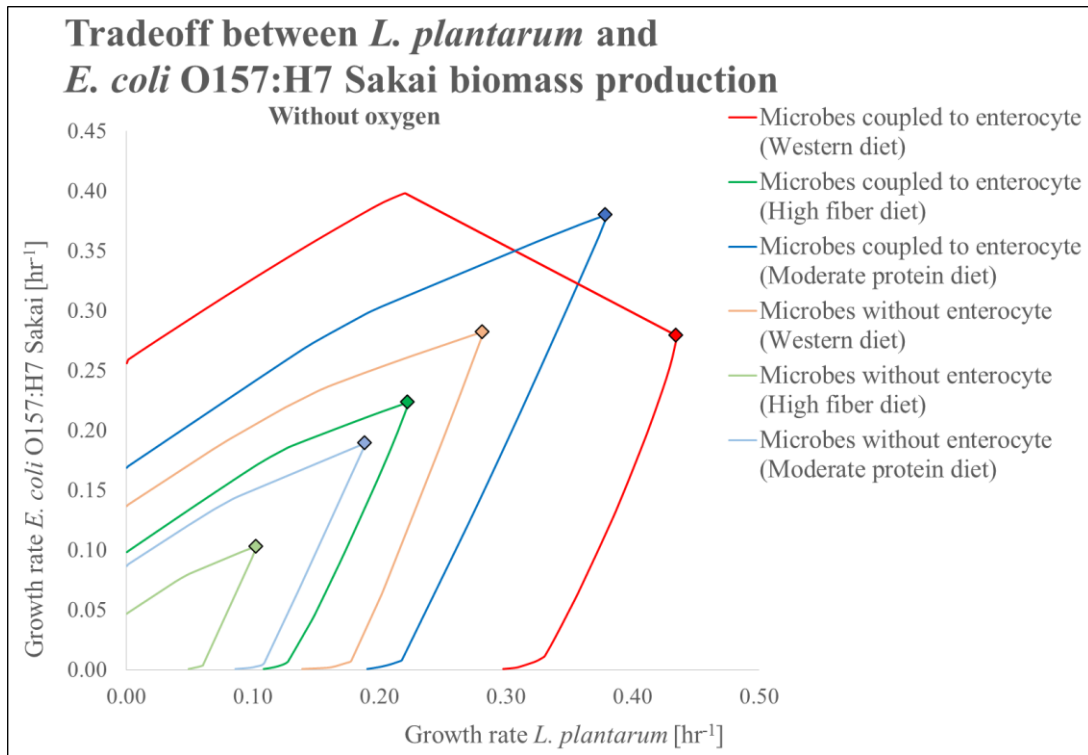

Figure S1.23

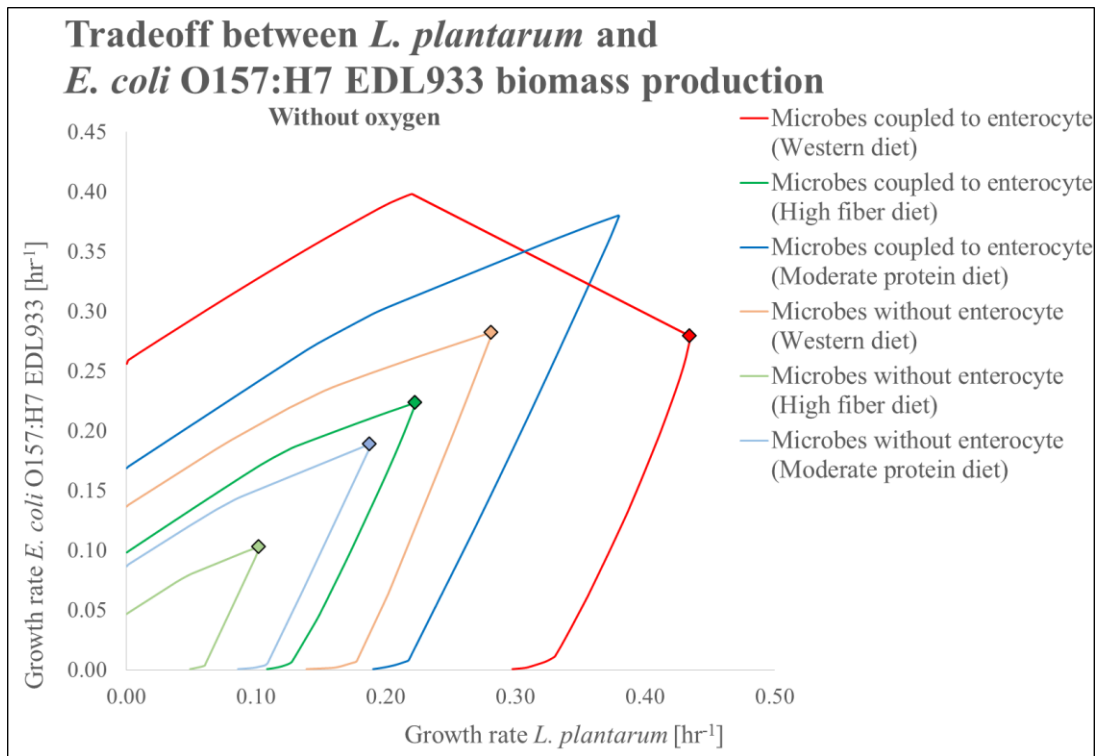

Figure S1.24

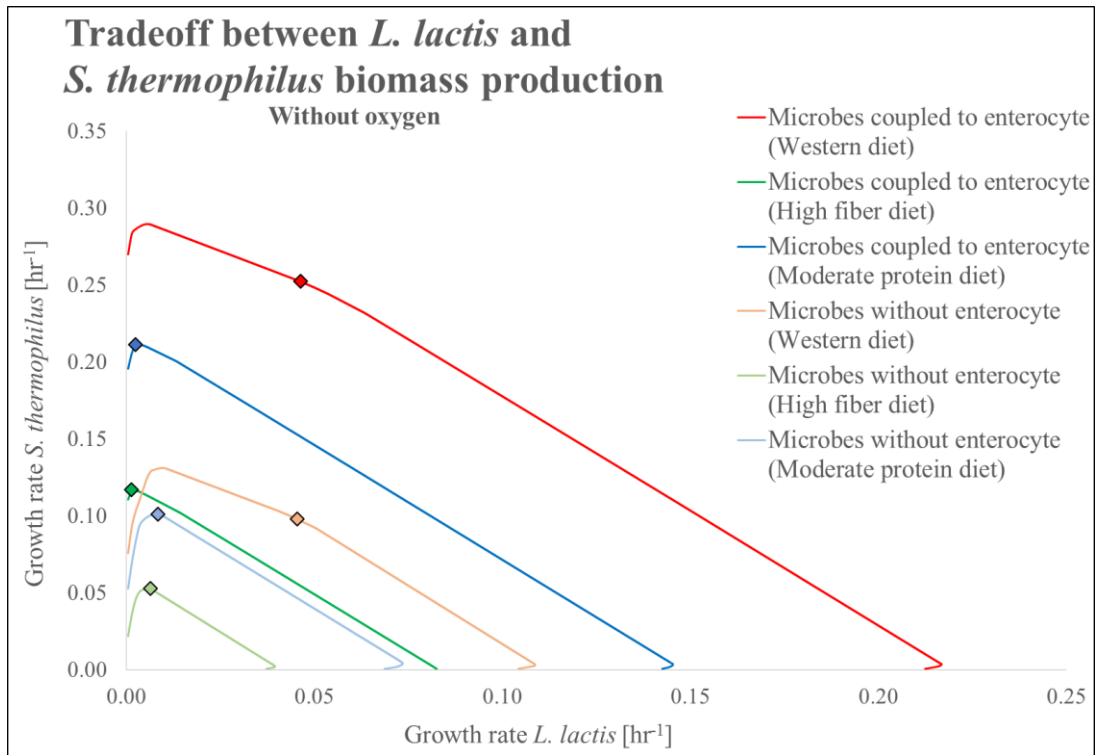

Figure S1.25

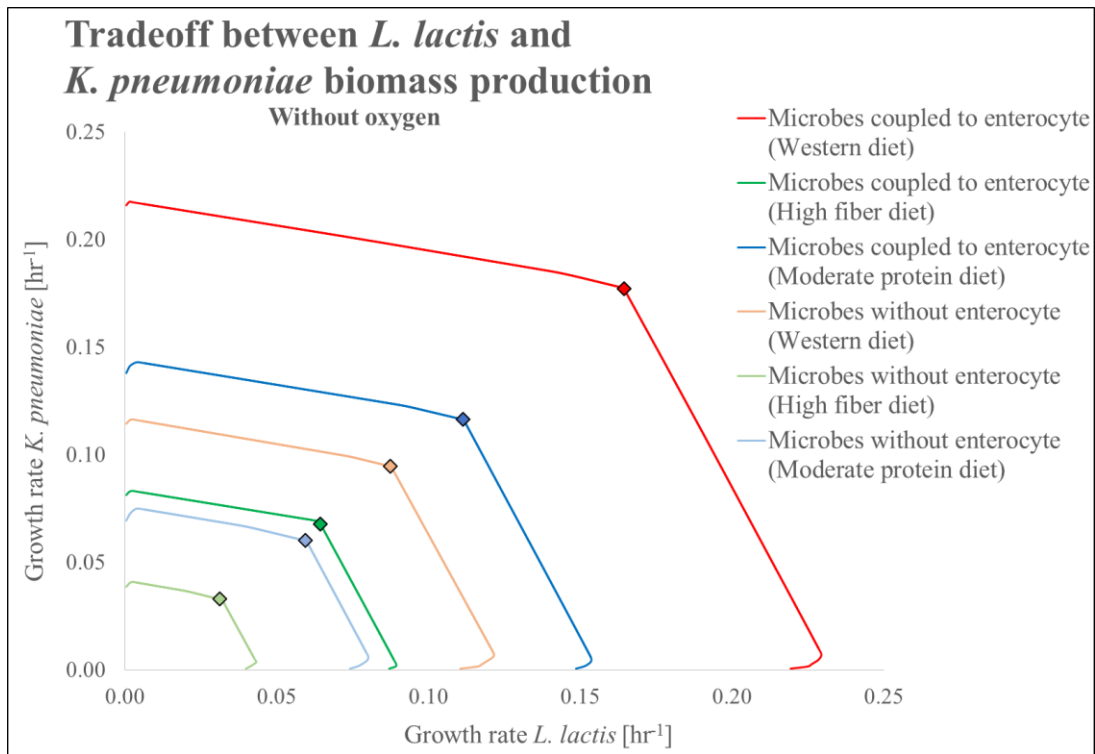

Figure S1.26

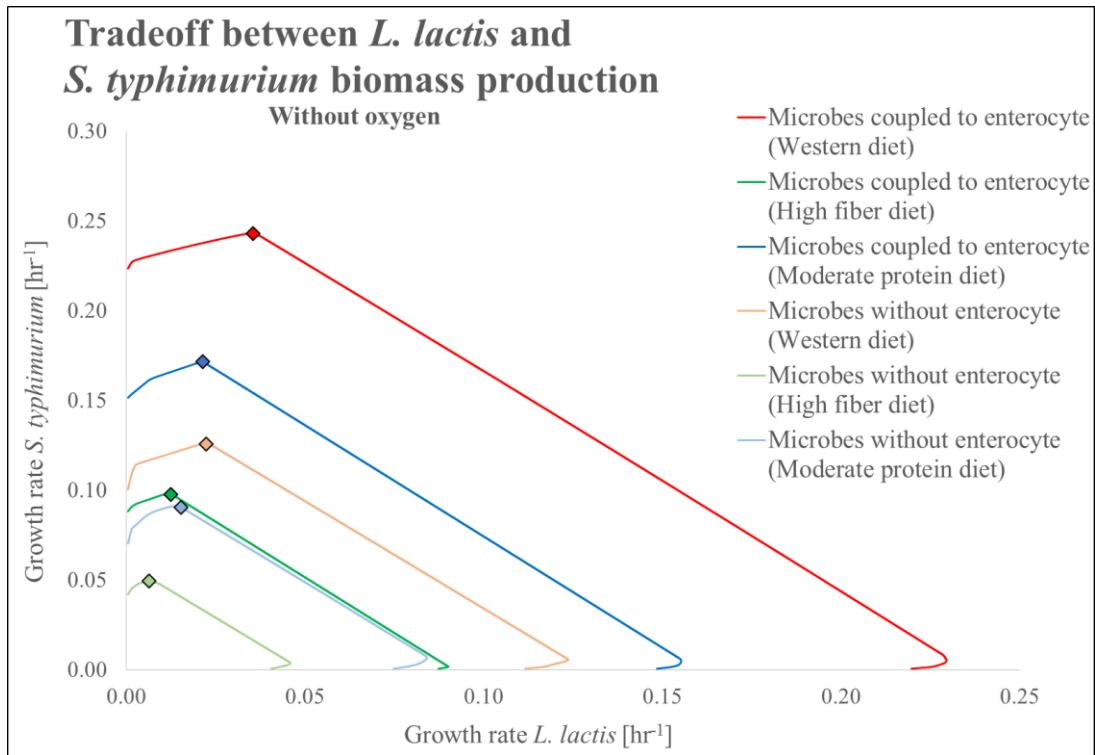

Figure S1.27

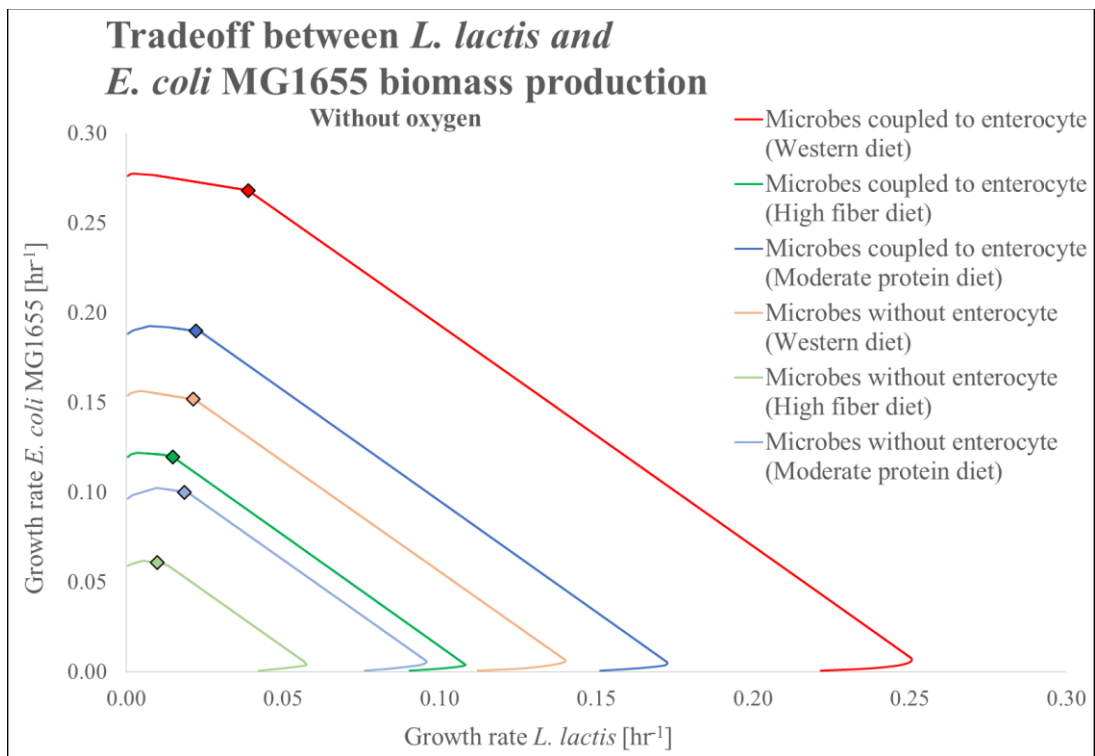

Figure S1.28

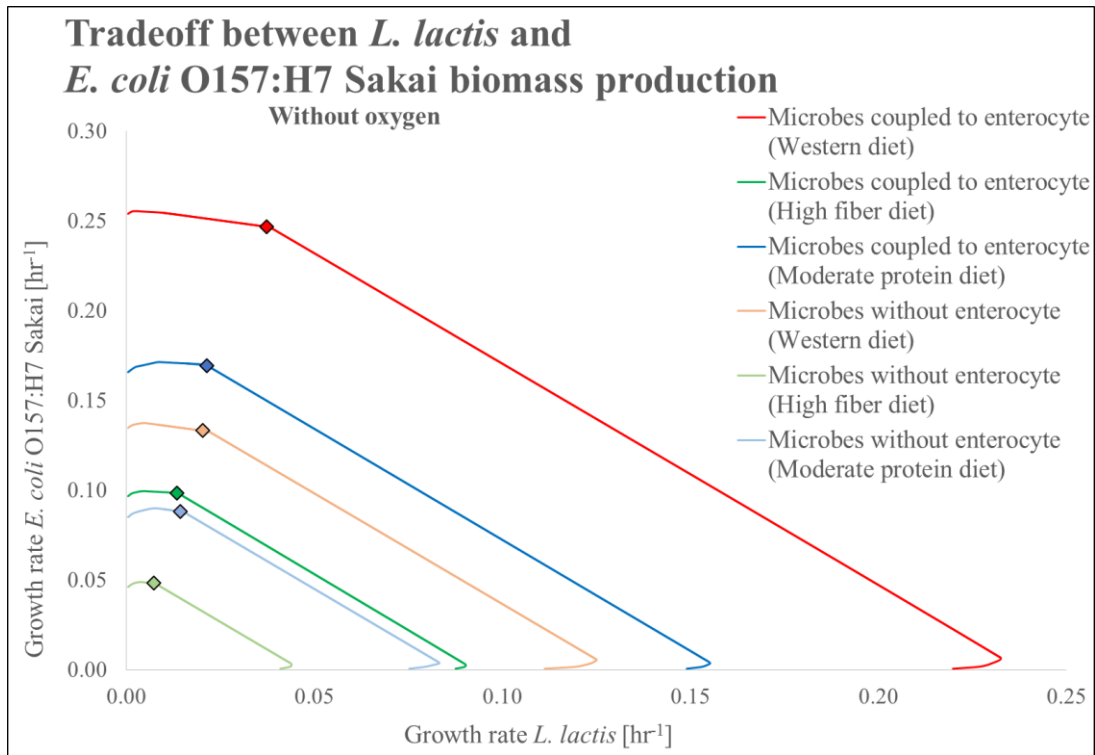

Figure S1.29

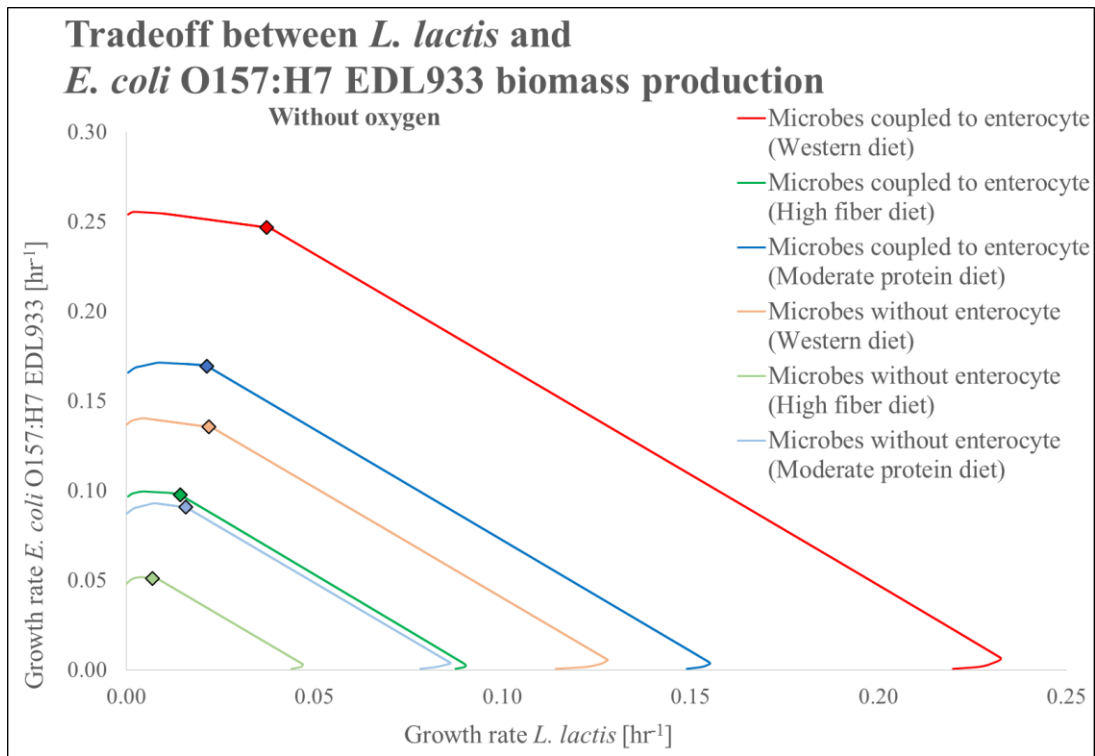

Figure S1.30

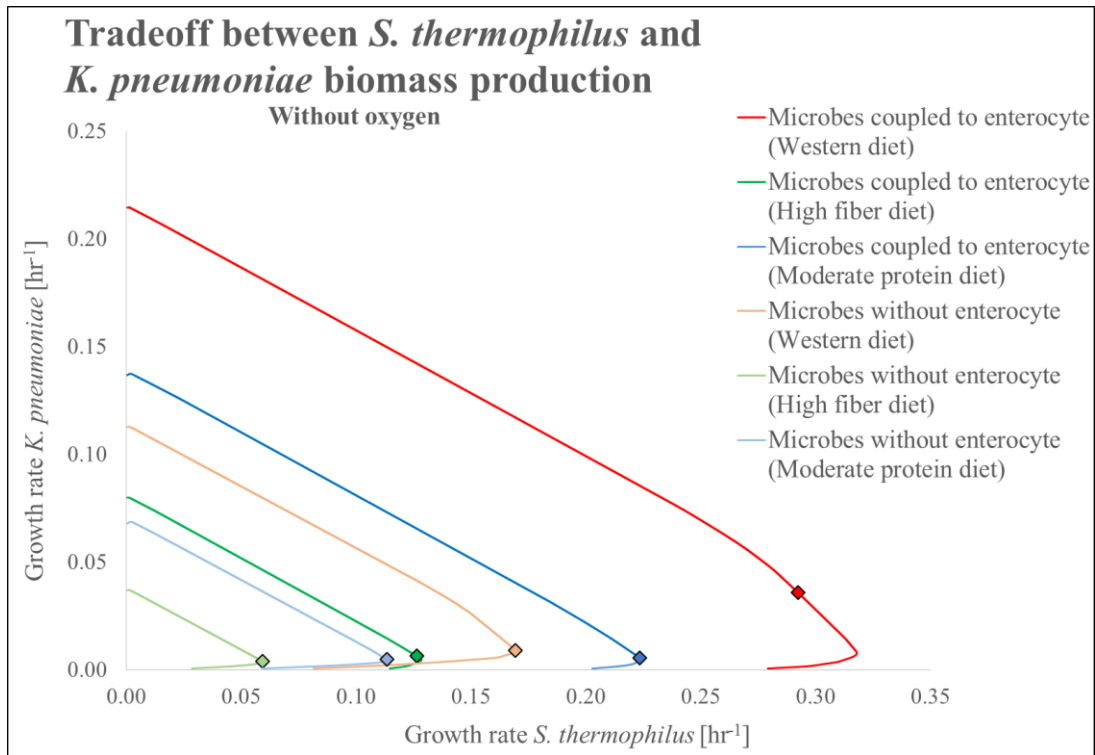

Figure S1.31

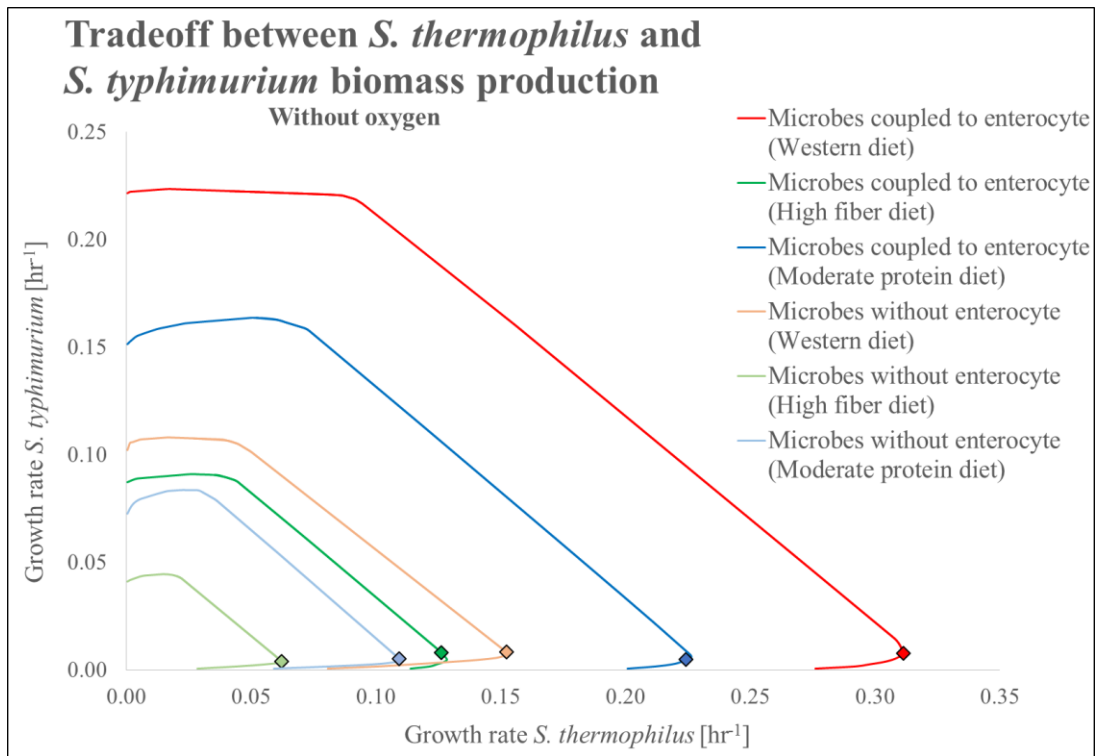

Figure S1.32

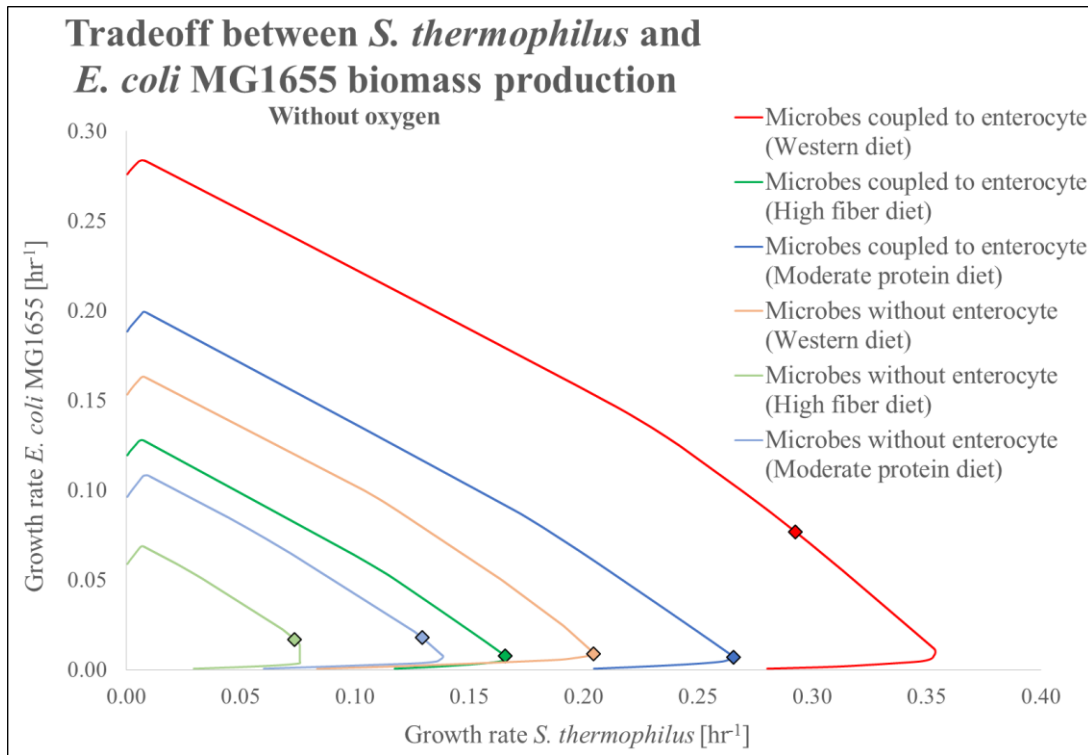

Figure S1.33

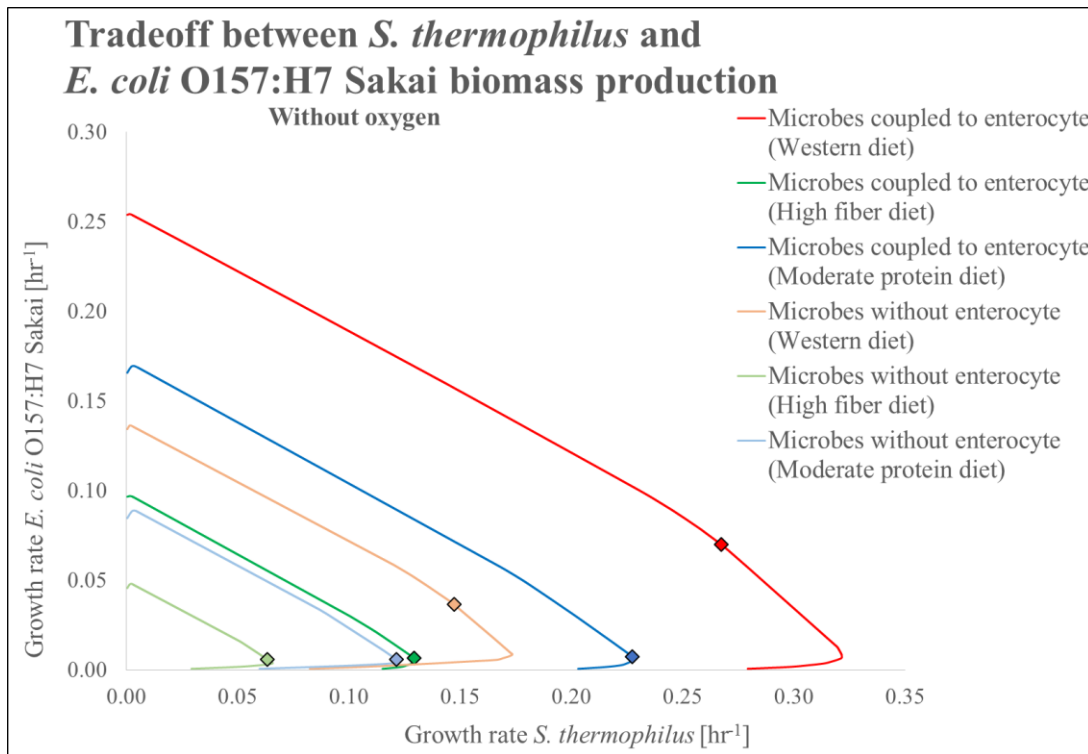

Figure S1.34

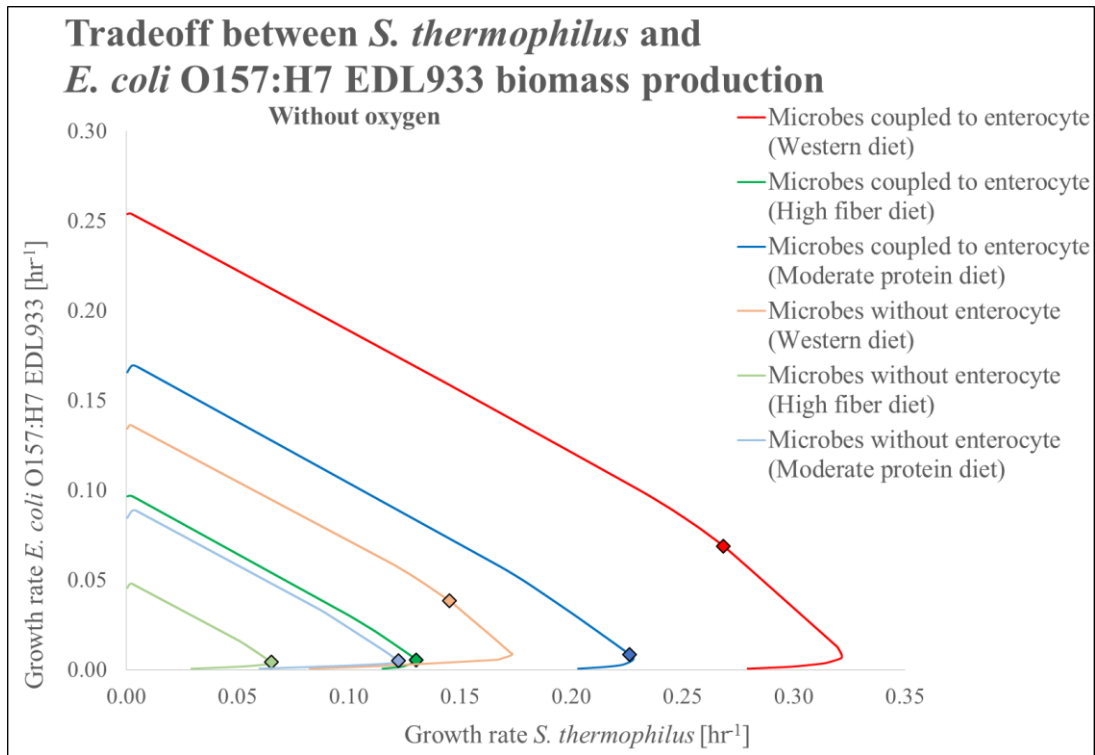

Figure S1.35

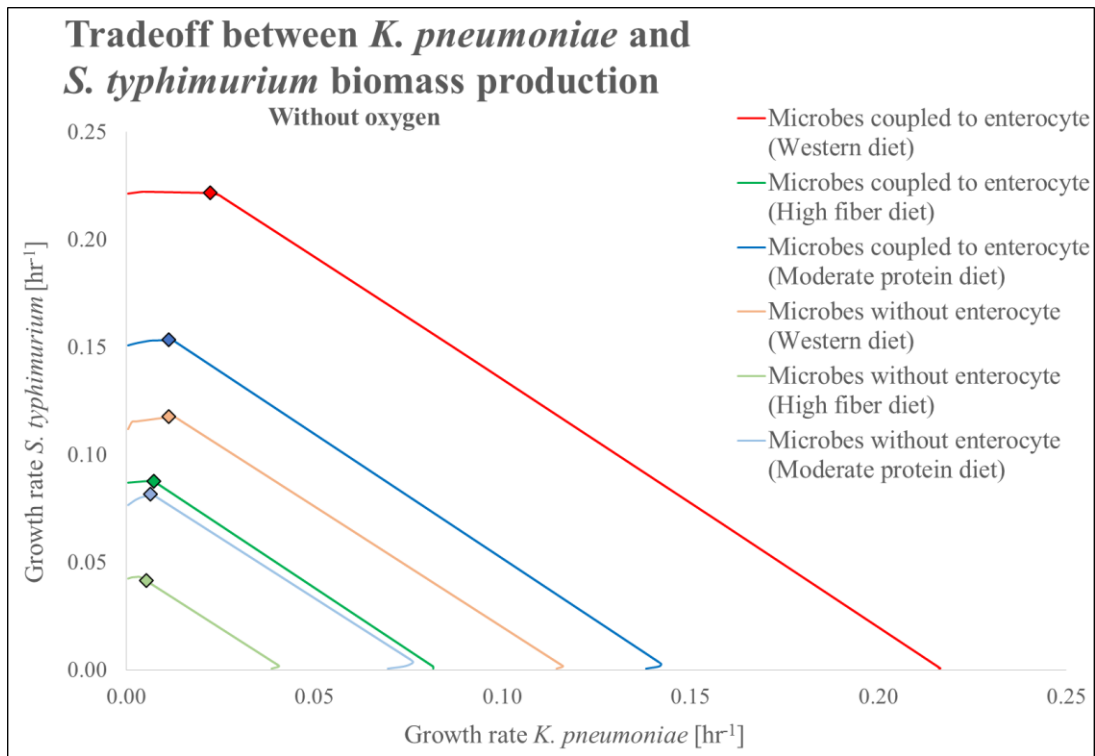

Figure S1.36



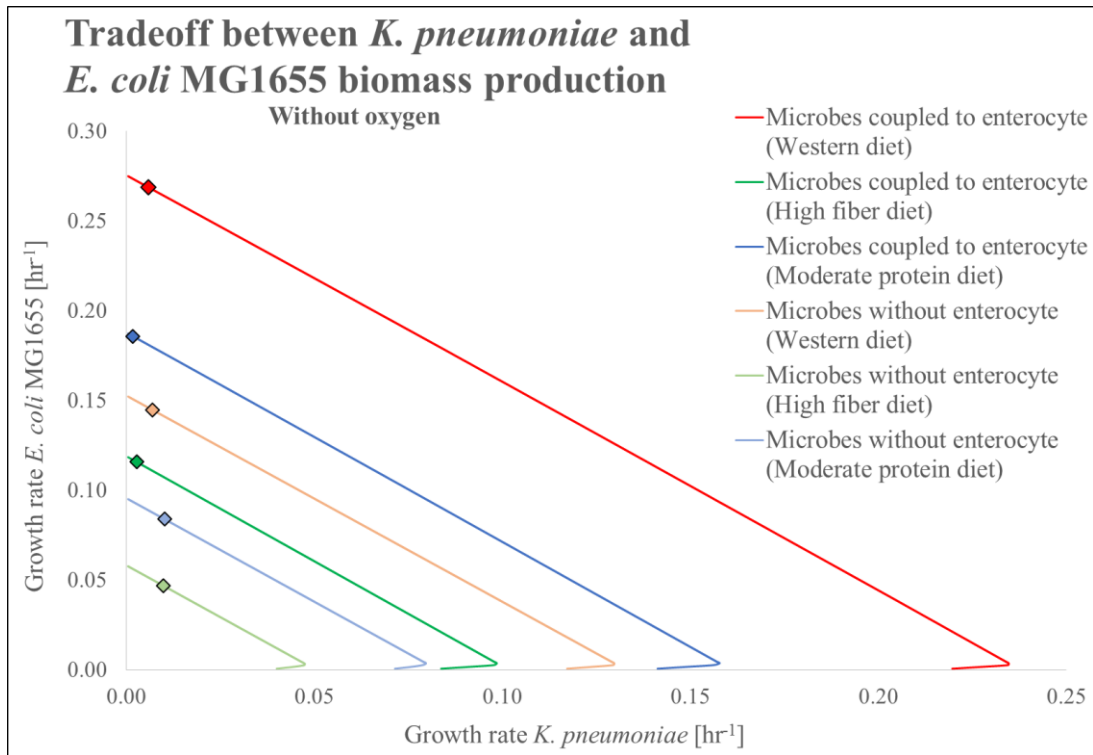

Figure S1.37

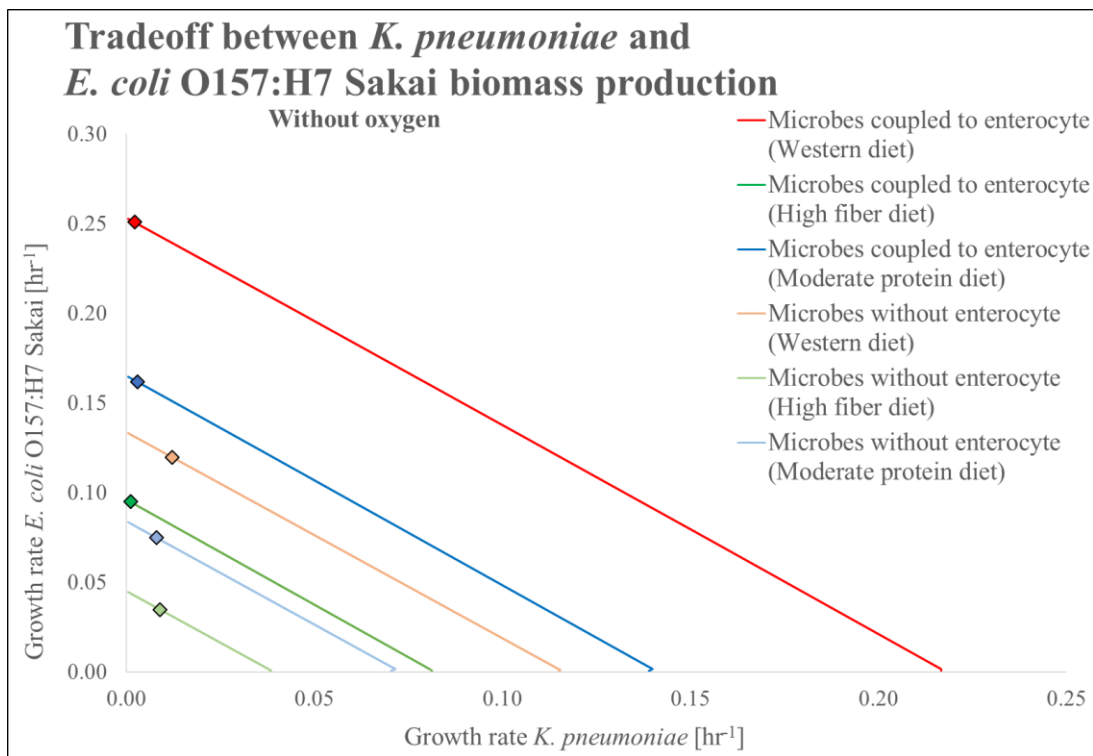

Figure S1.38

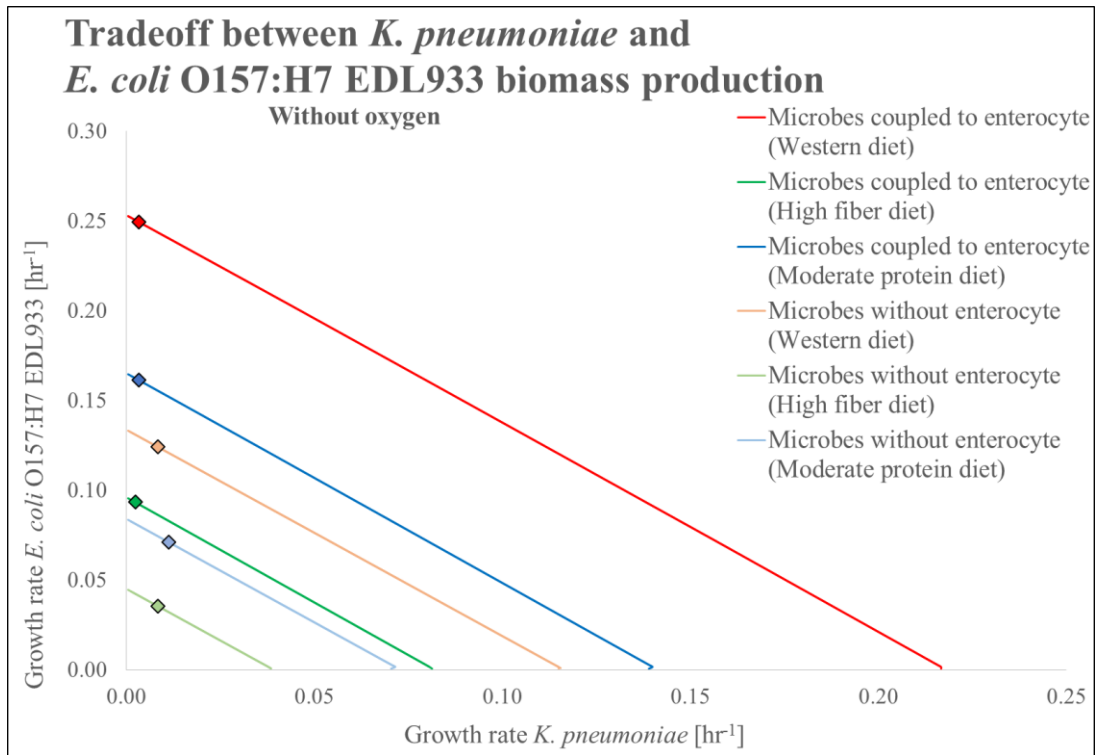

Figure S1.39

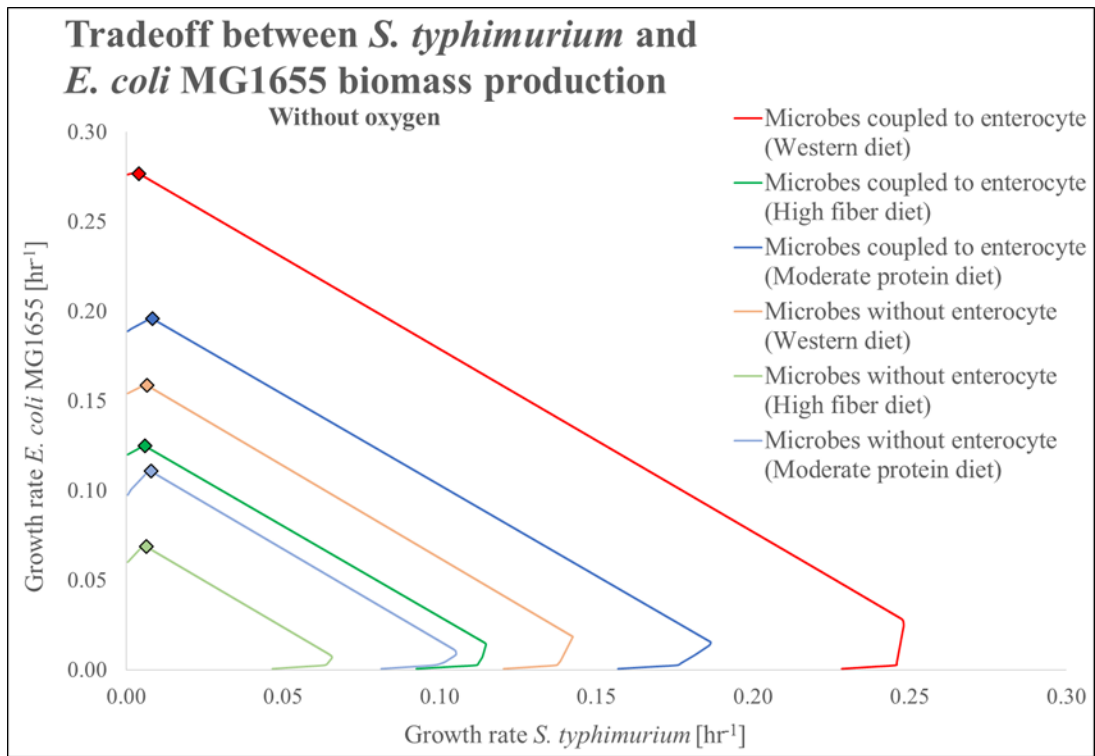

Figure S1.40

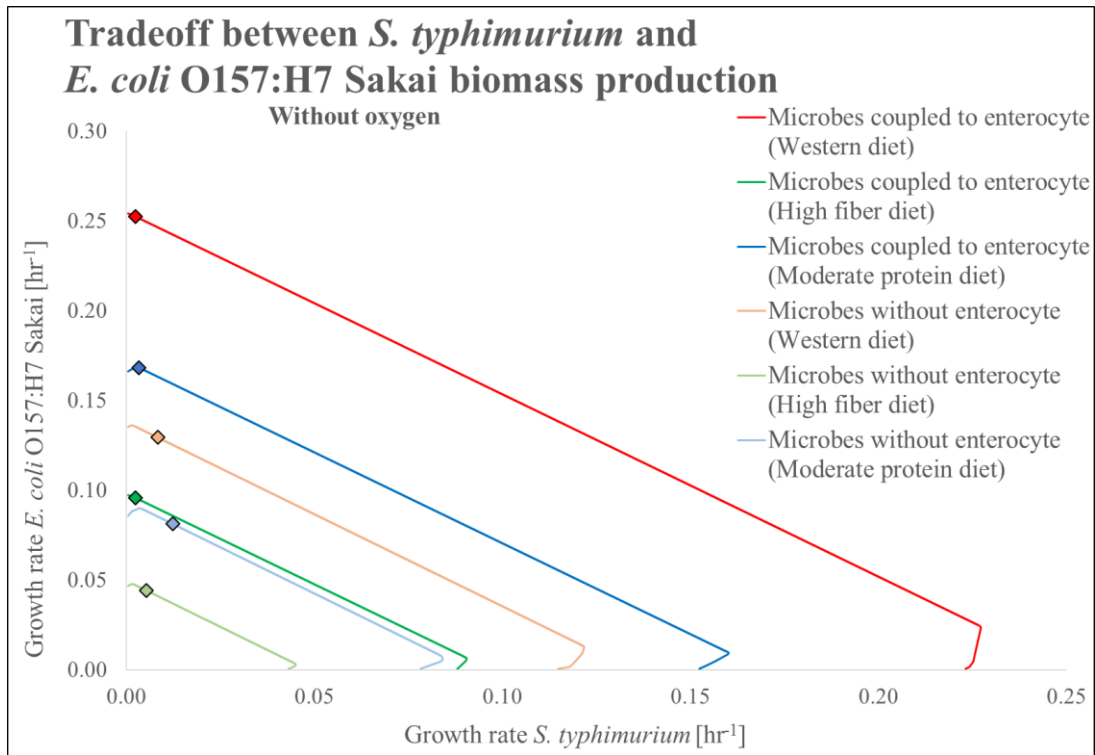

Figure S1.41

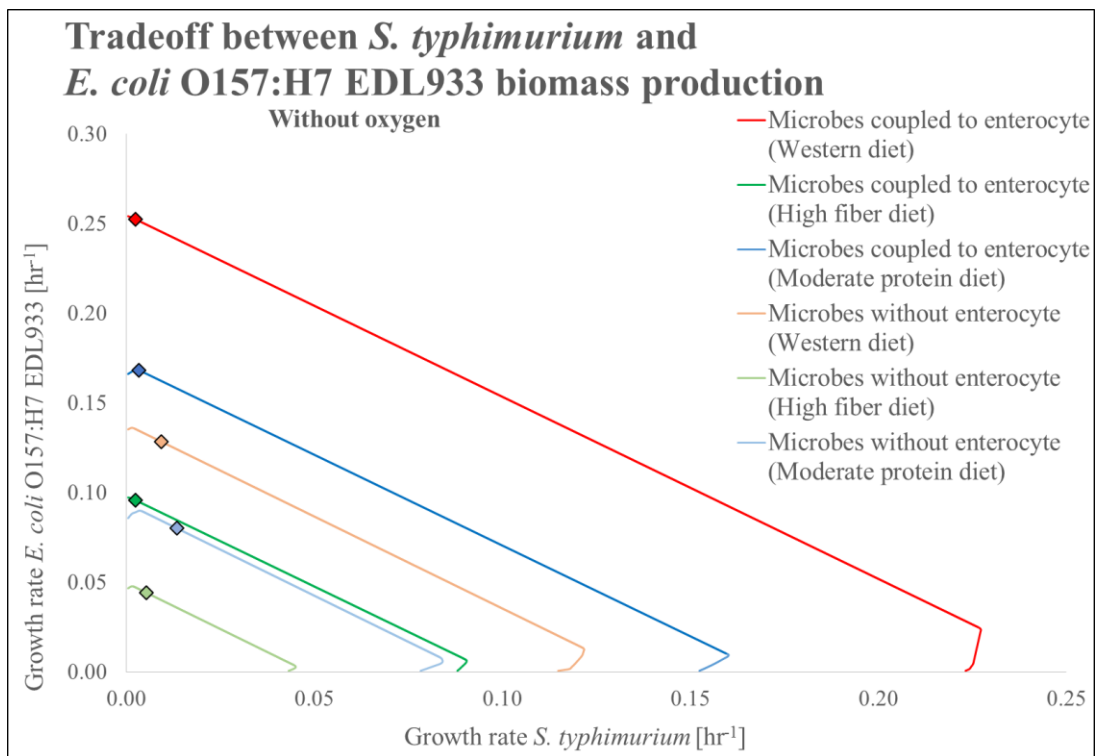

Figure S1.42

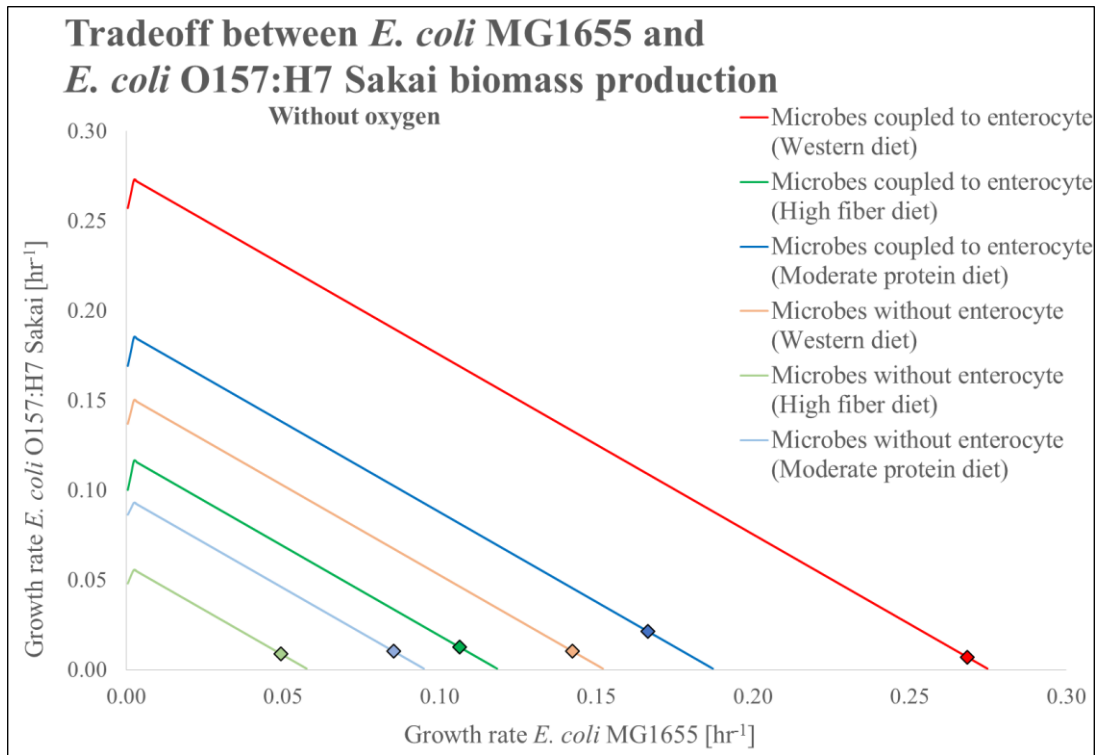

Figure S1.43

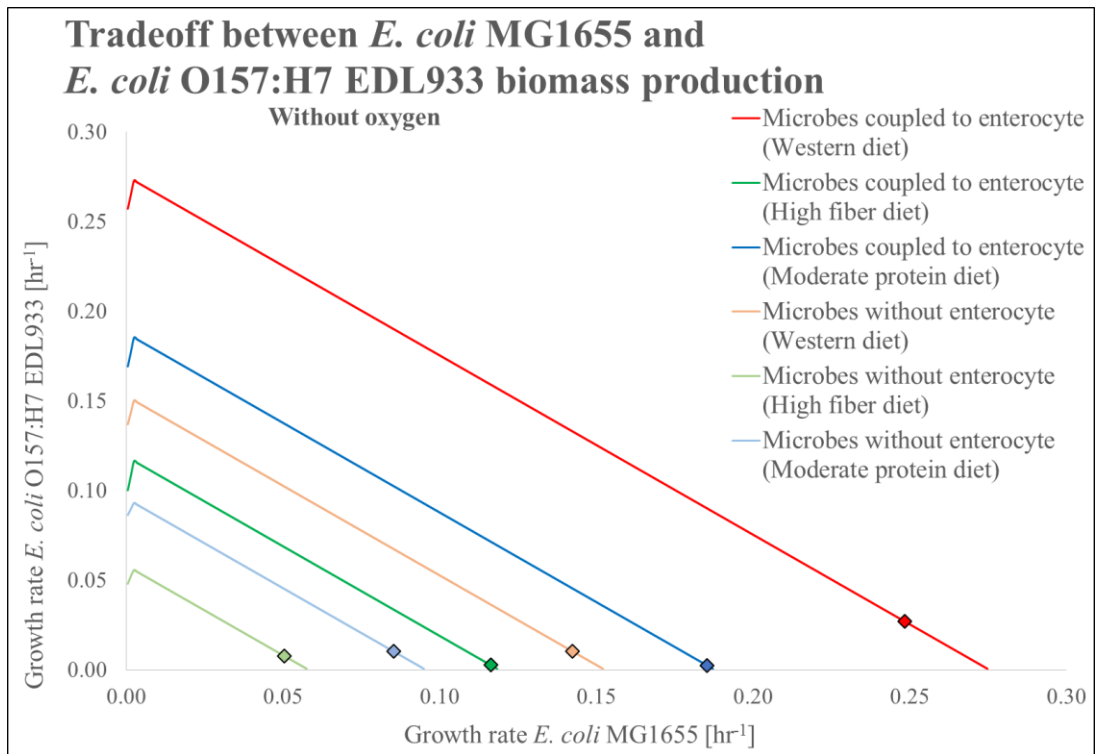

Figure S1.44

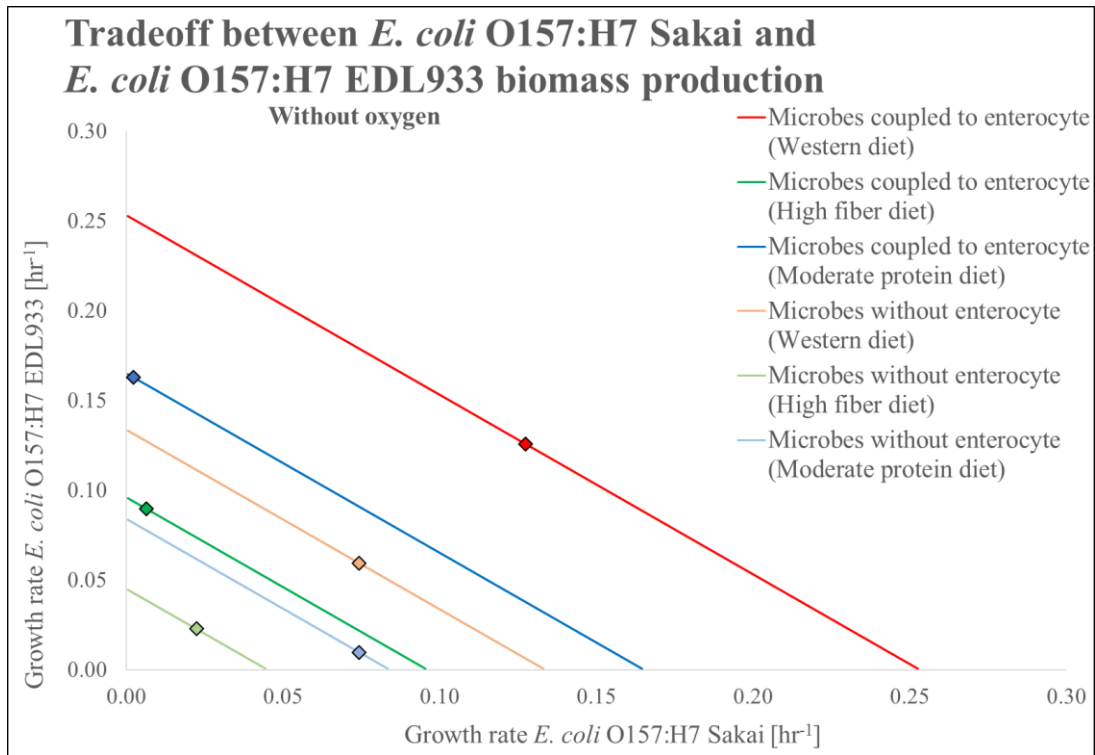

Figure S1.45

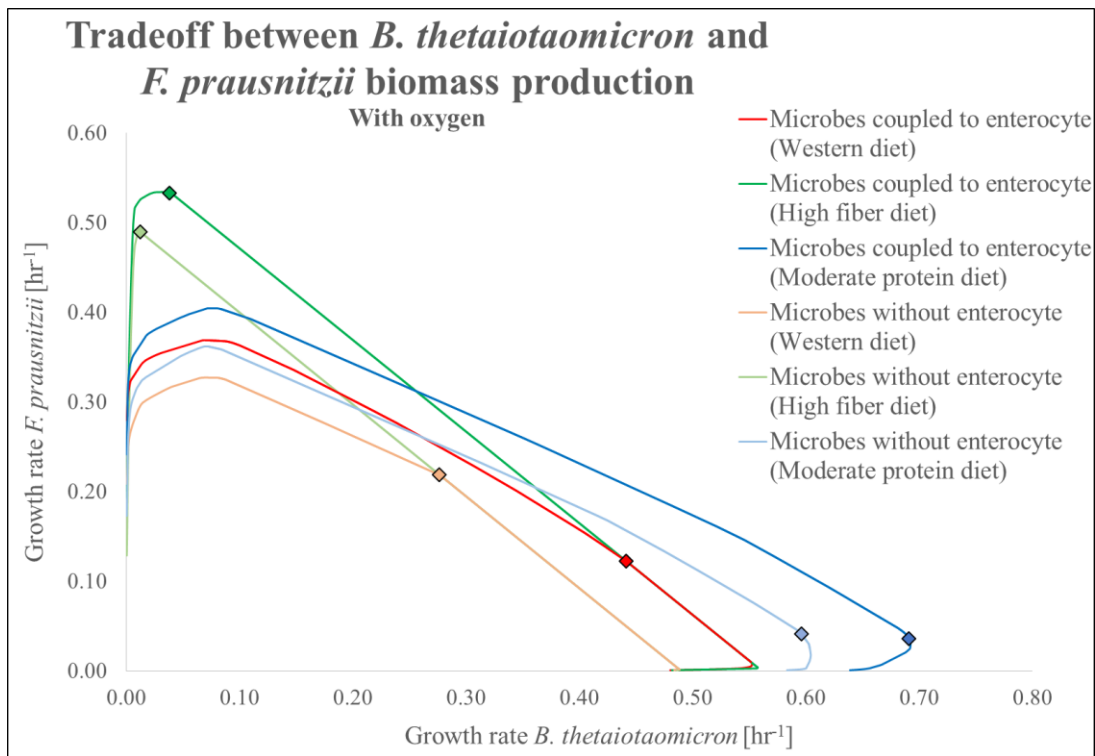

Figure S1.46

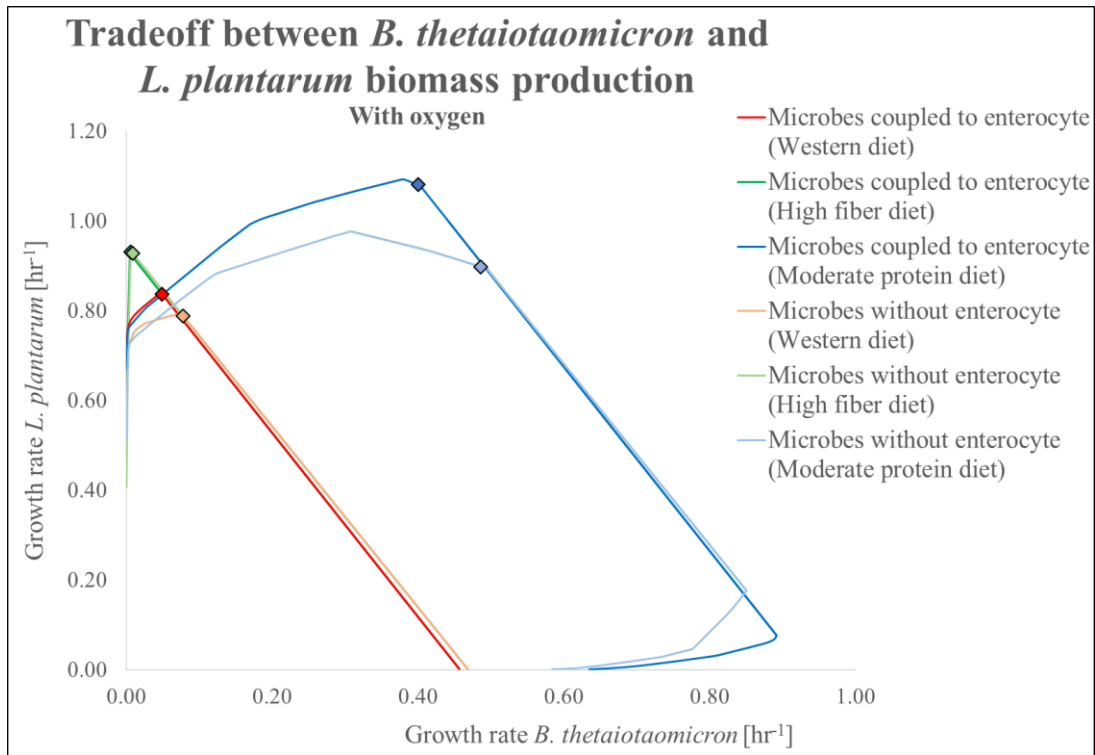

Figure S1.47

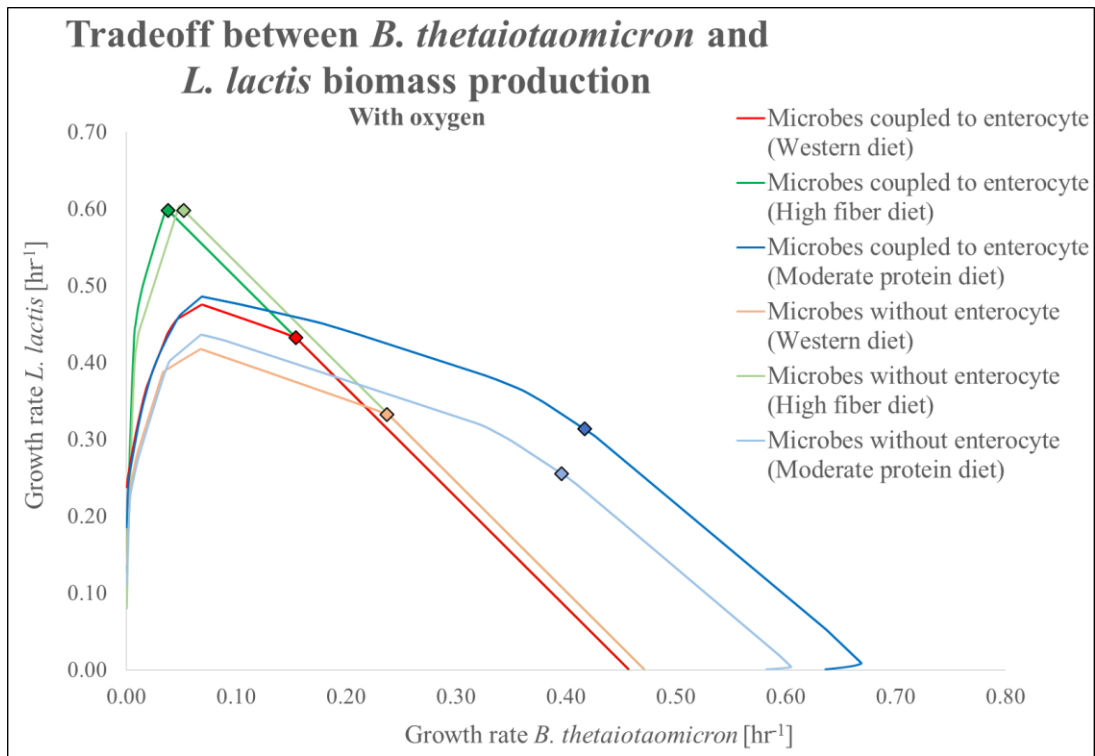

Figure S1.48

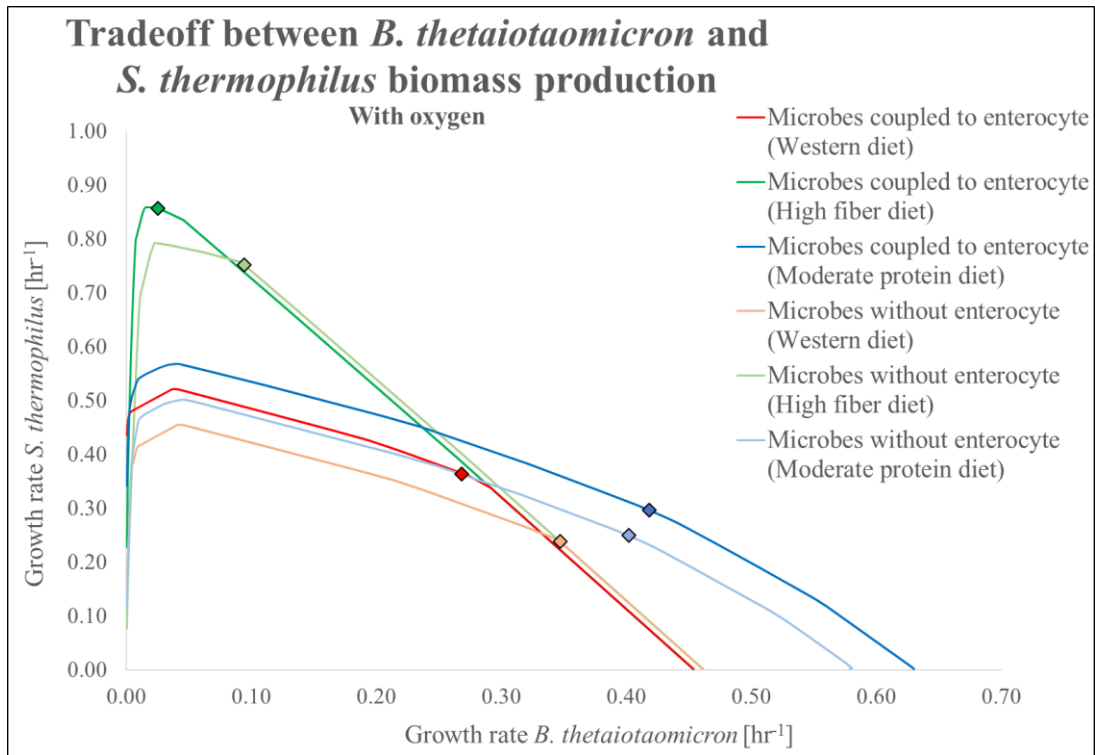

**Figure S1.49**

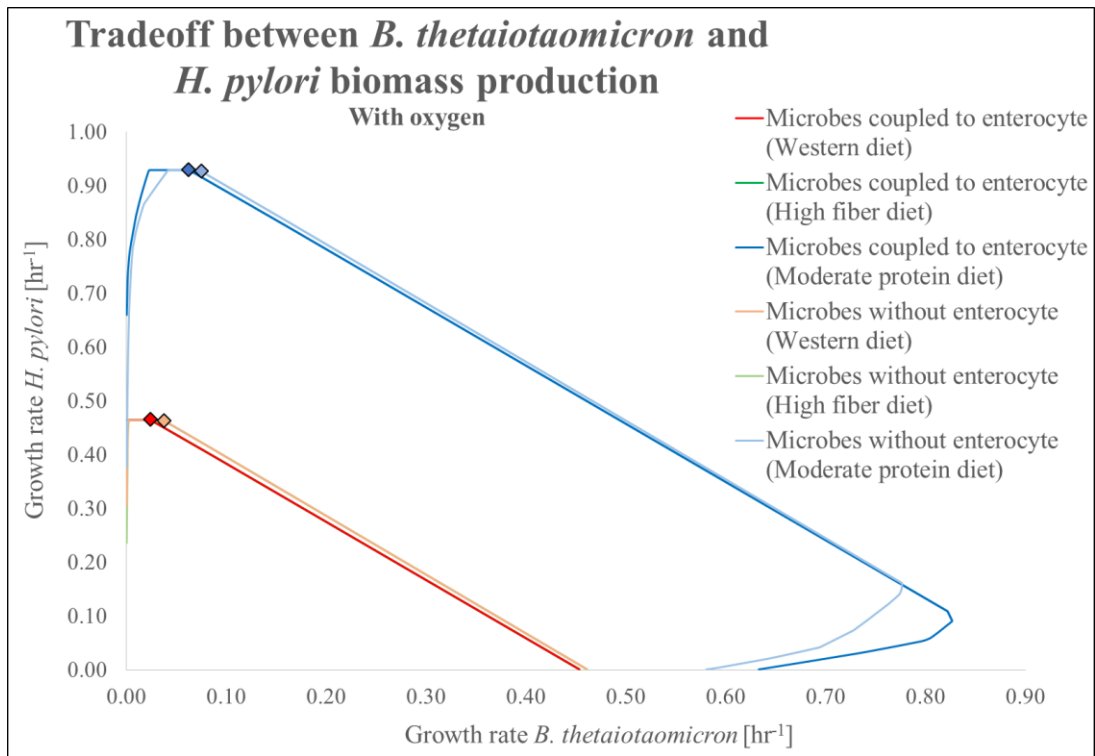

**Figure S1.50**

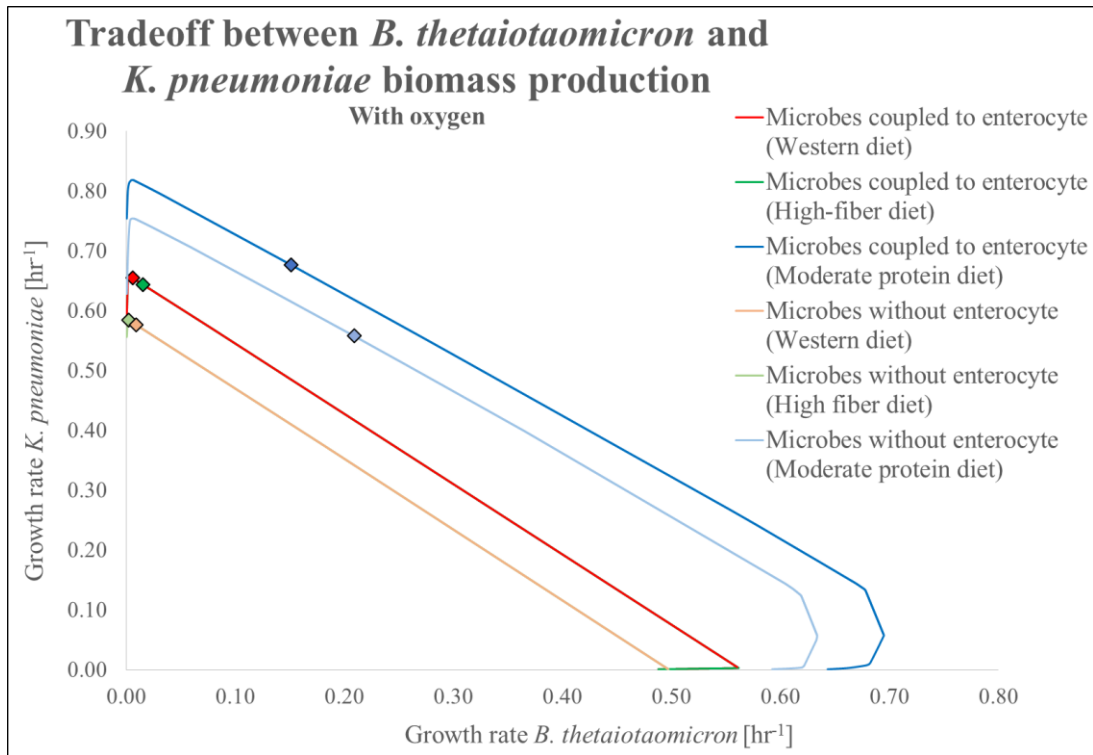

Figure S1.51

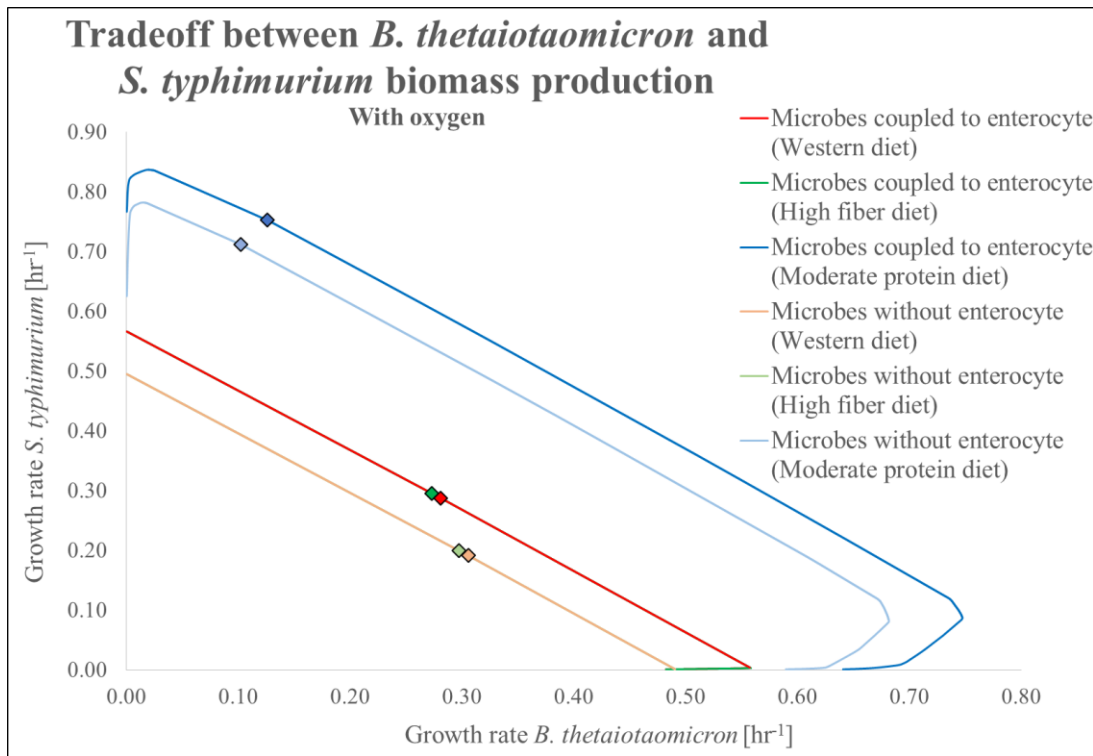

Figure S1.52



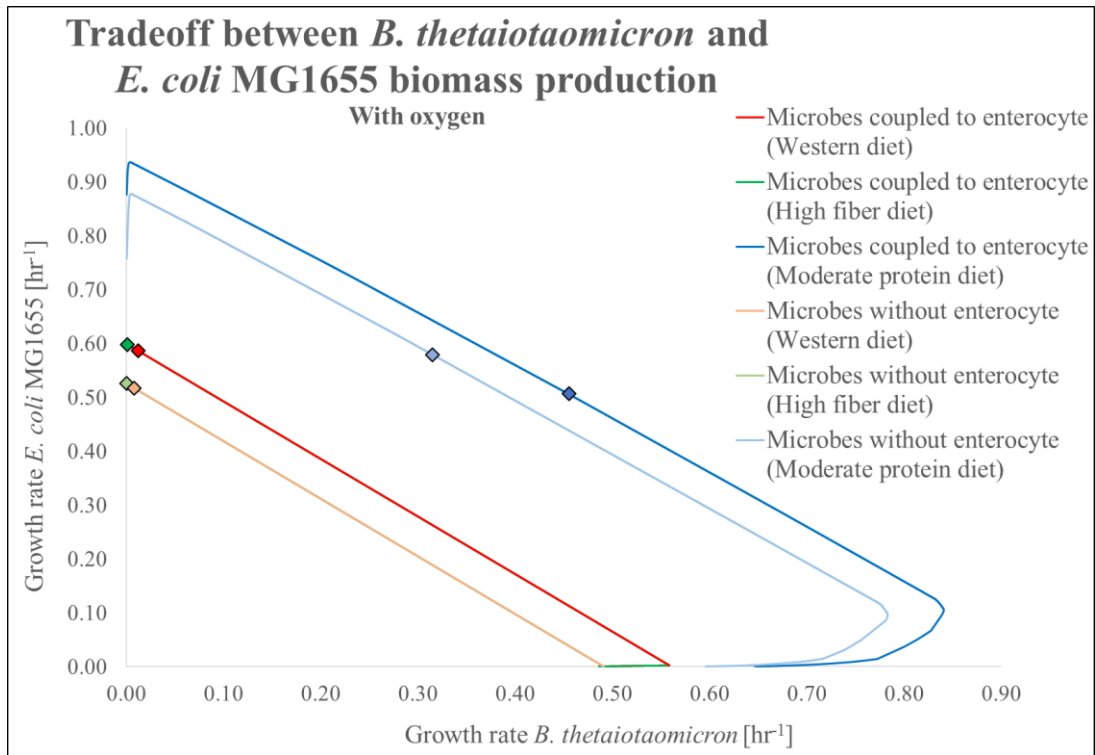

Figure S1.53

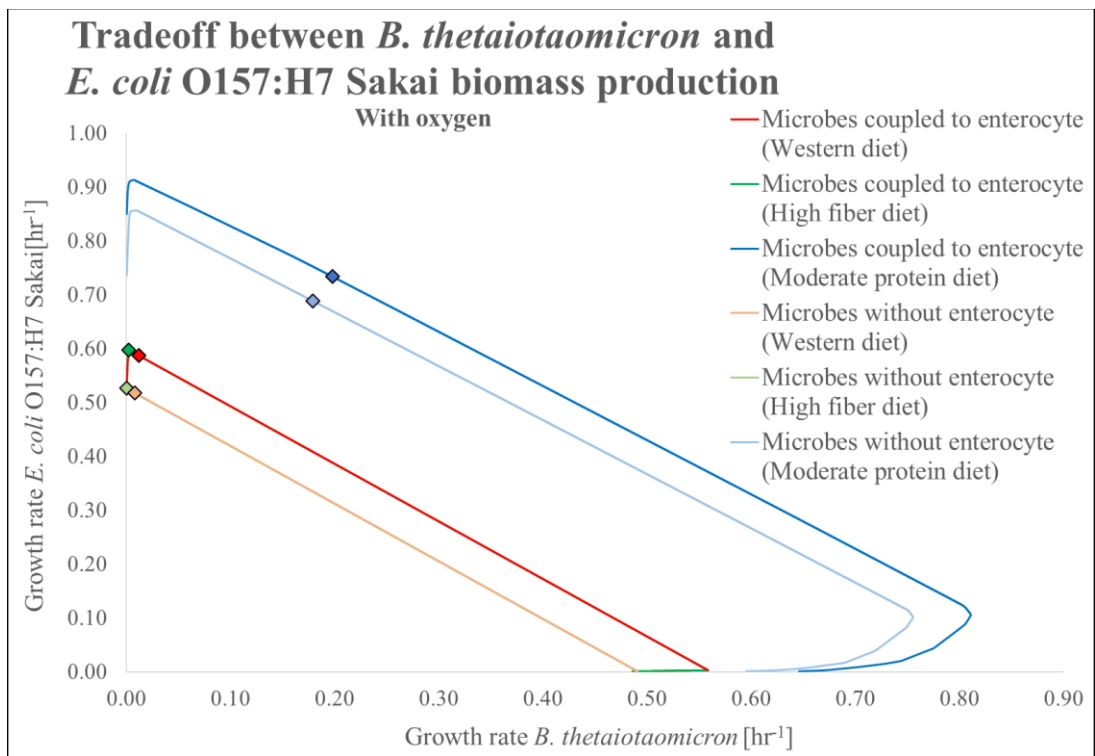

Figure S1.54

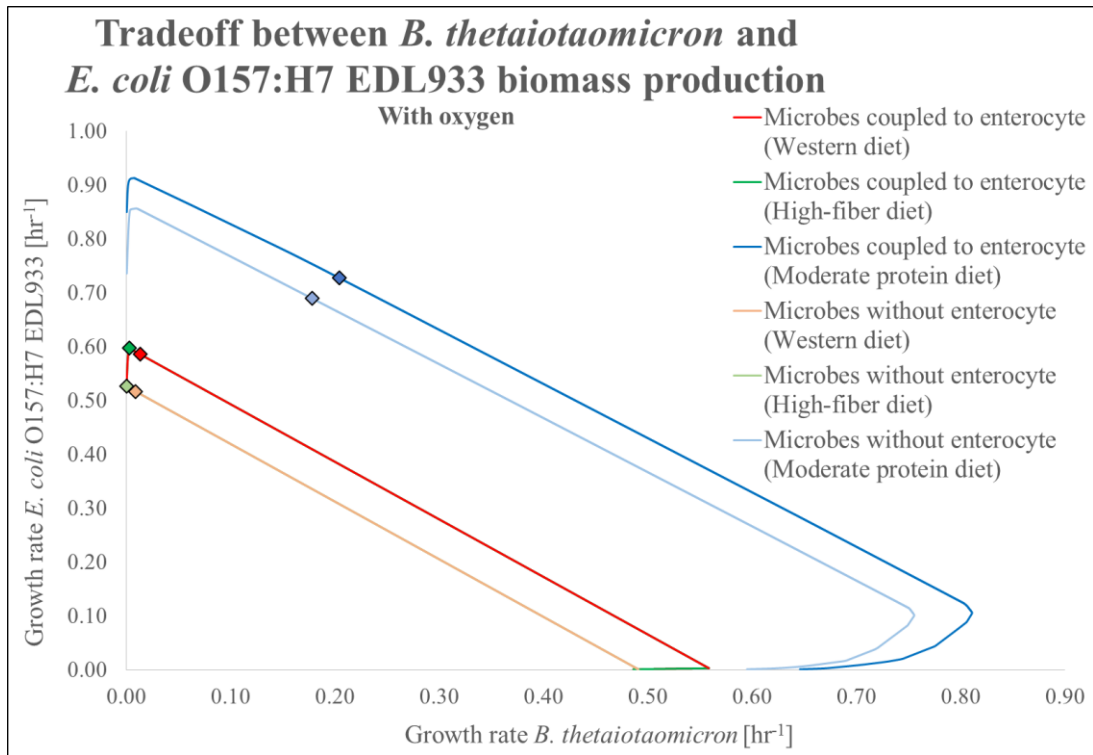

**Figure S1.55**

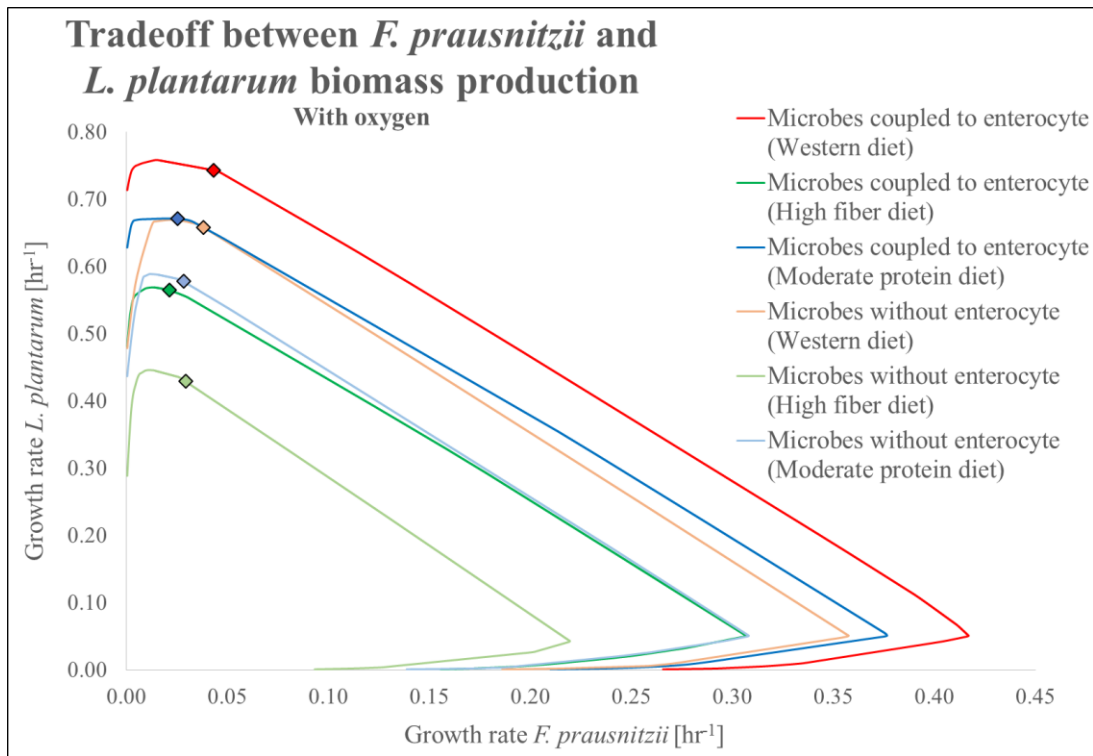

**Figure S1.56**

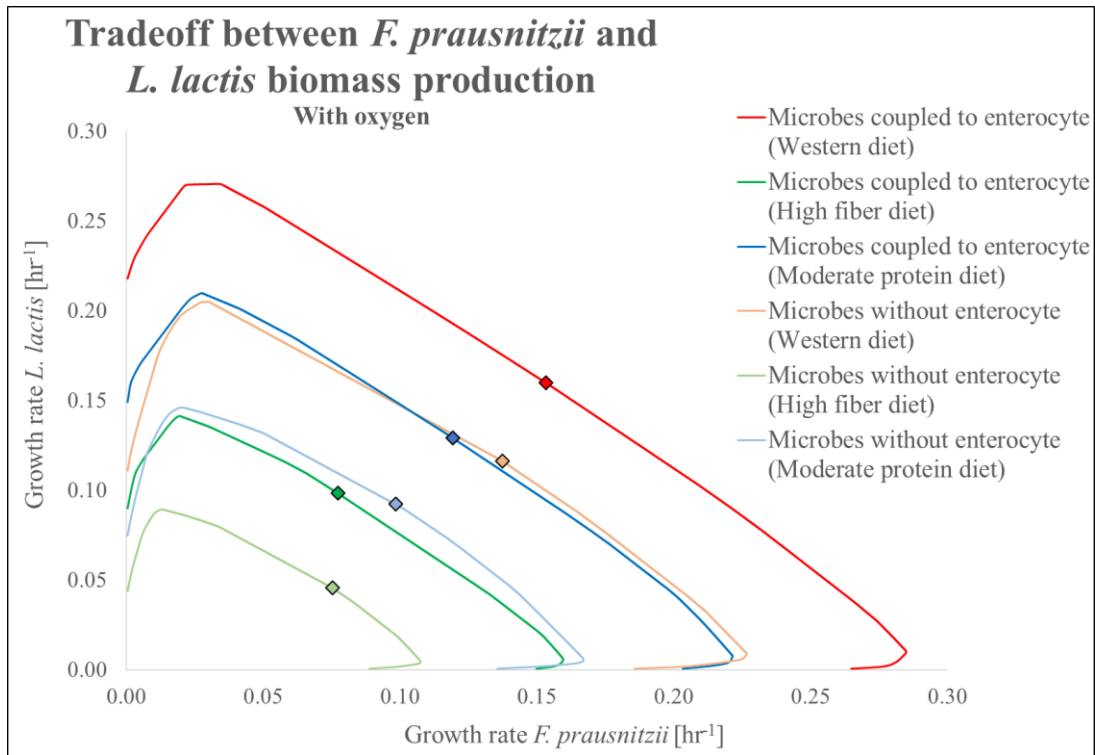

Figure S1.57

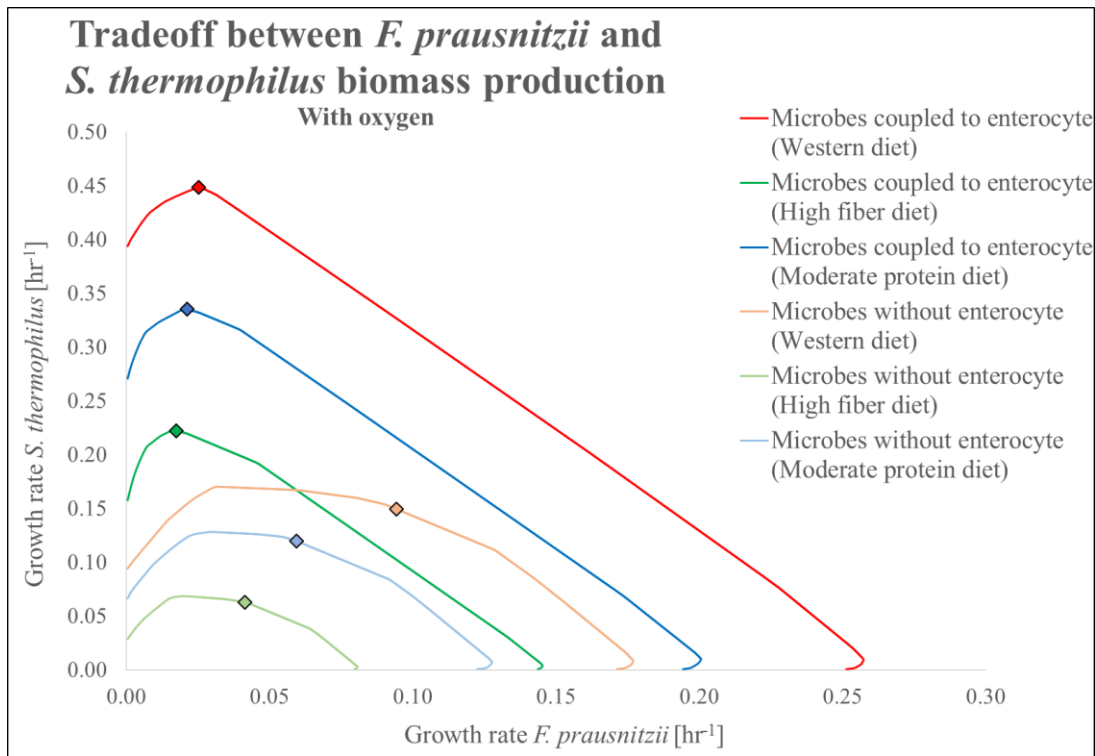

Figure S1.58

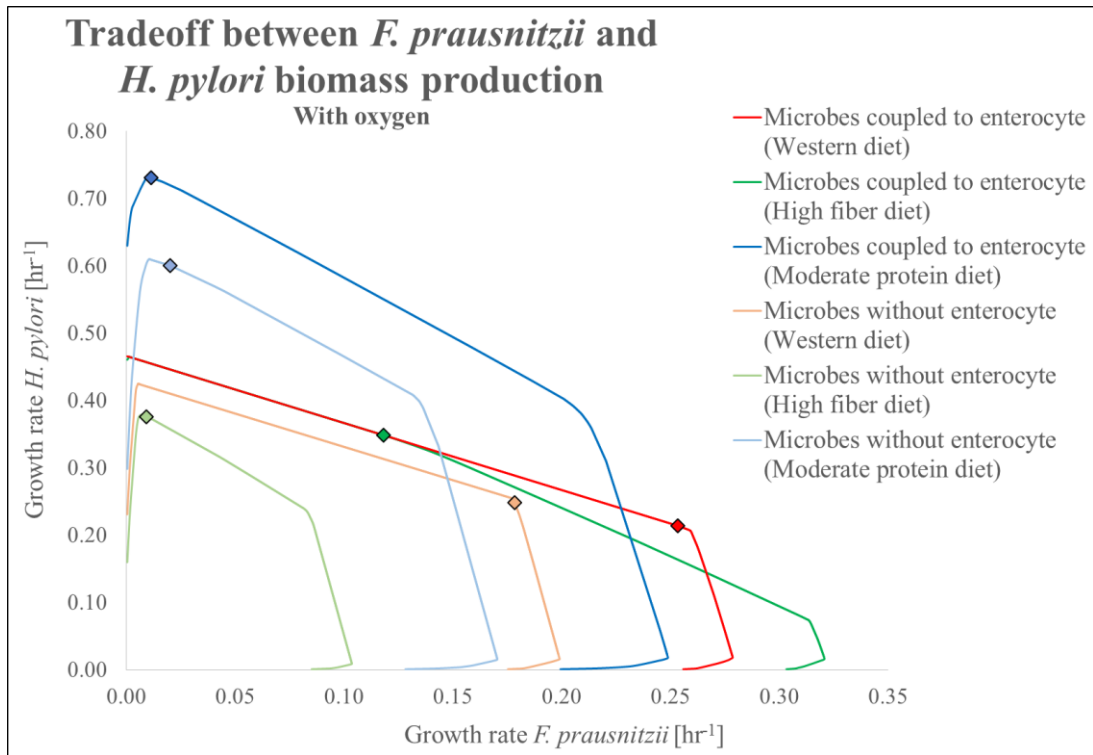

Figure S1.59

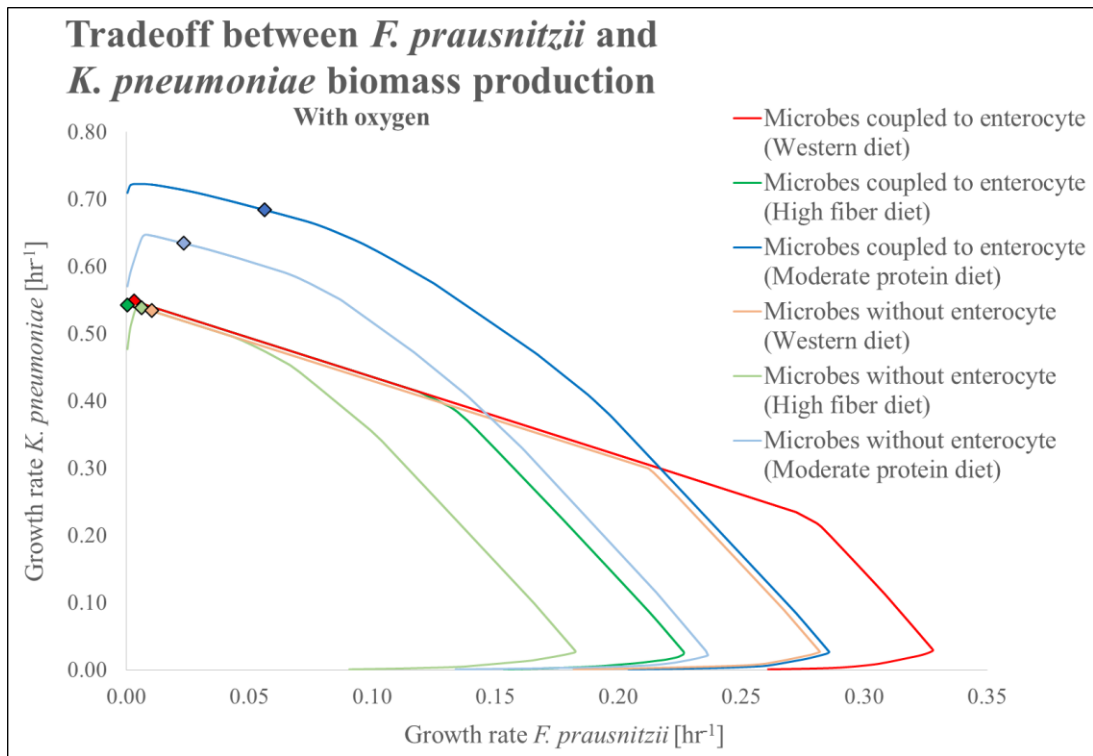

Figure S1.60

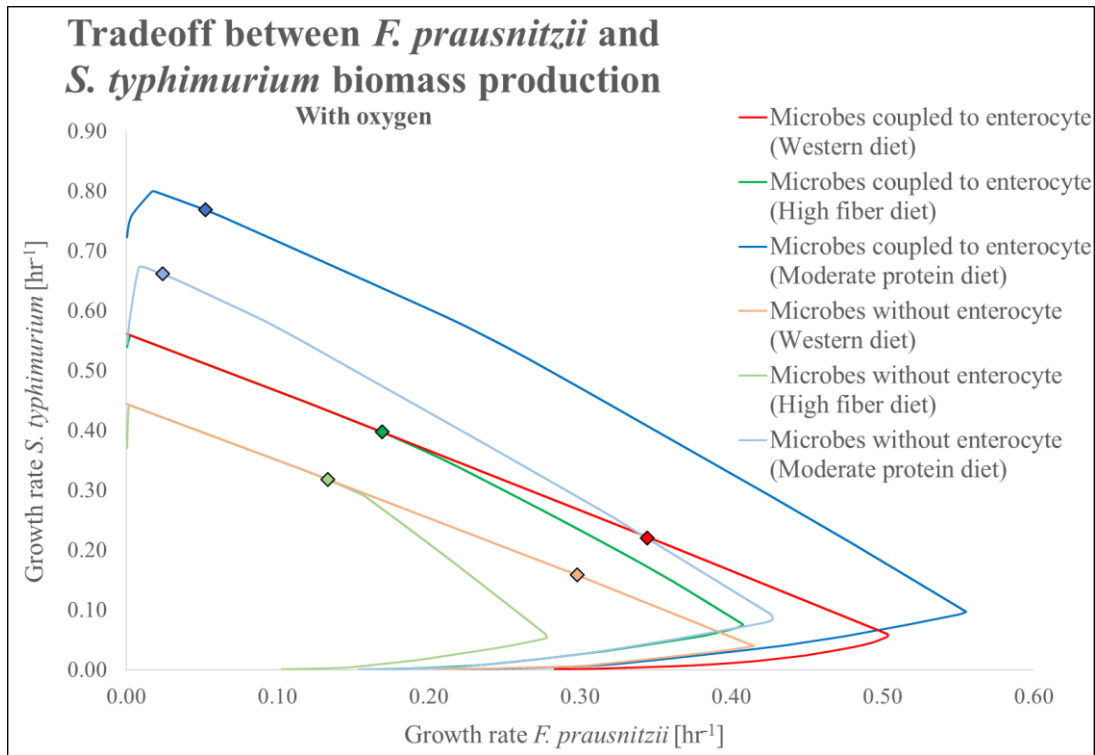

Figure S1.61

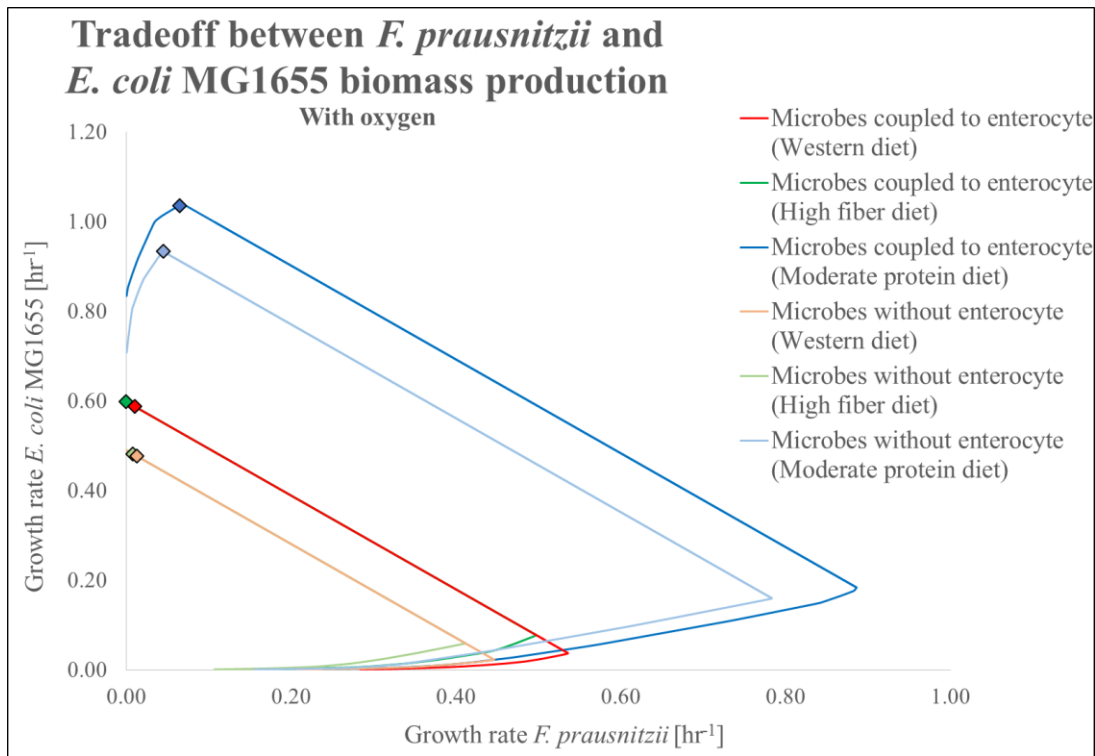

Figure S1.62

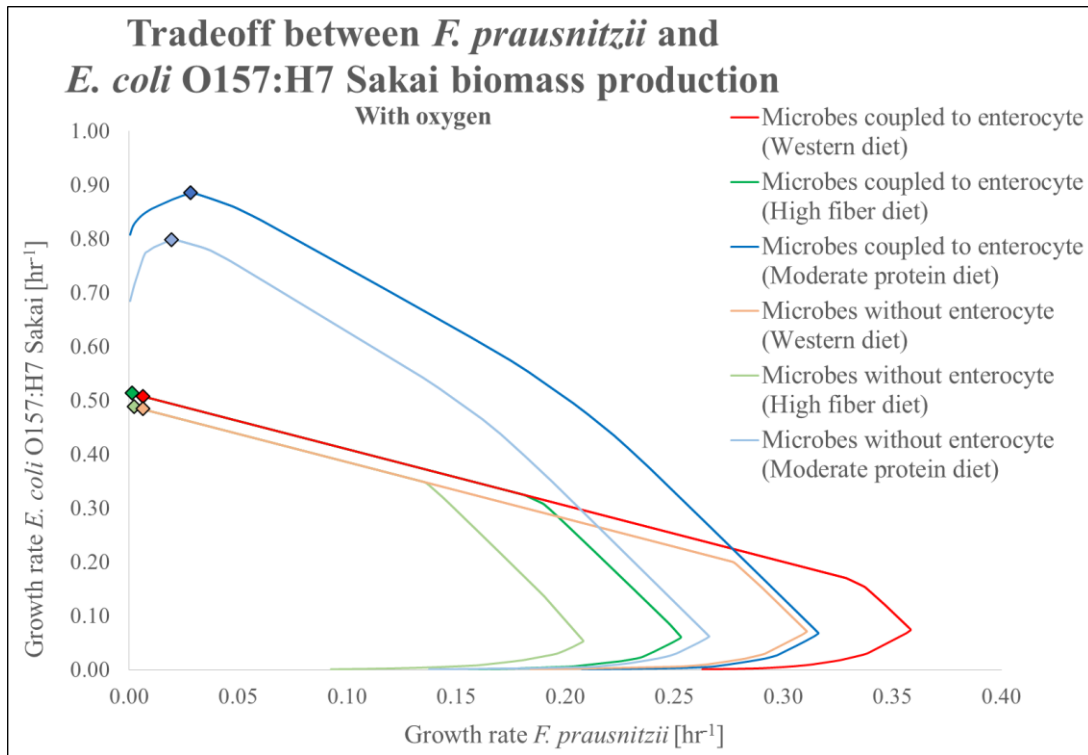

**Figure S1.63**

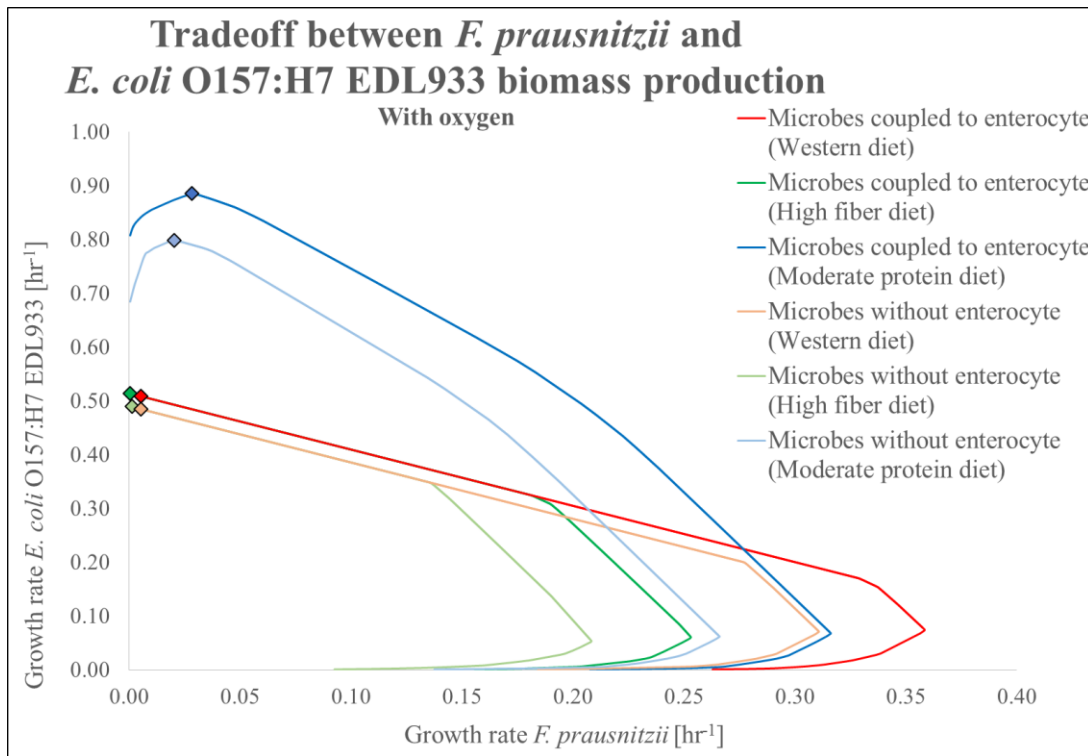

**Figure S1.64**

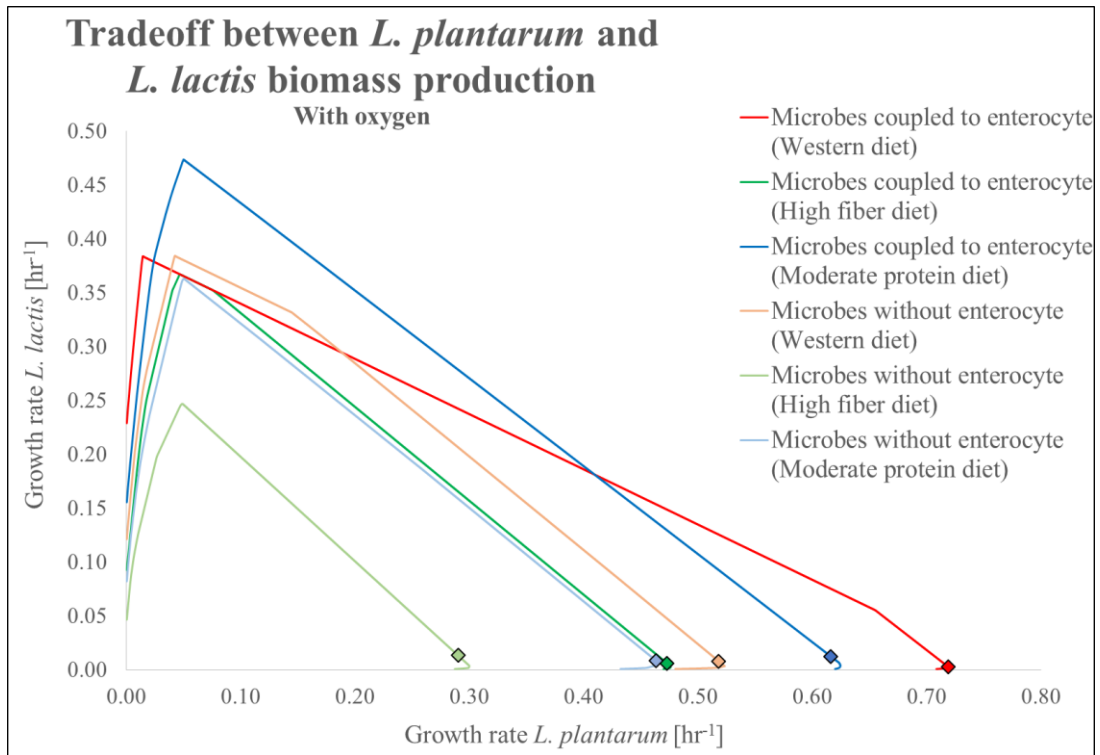

Figure S1.65

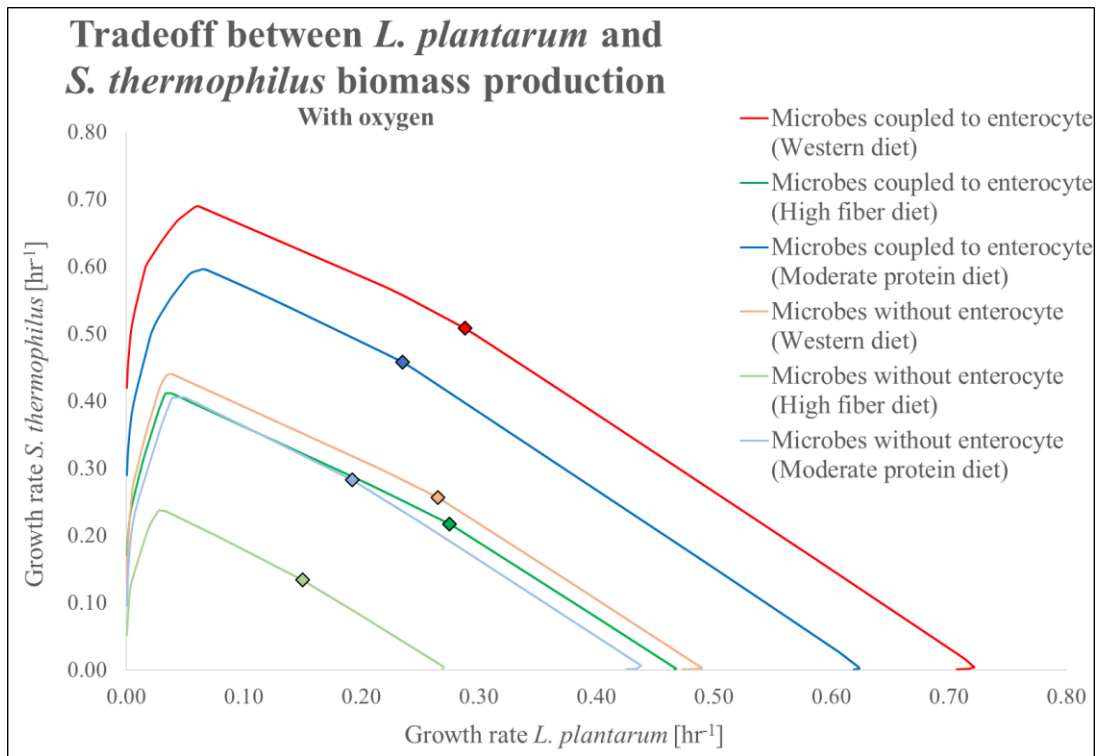

Figure S1.66

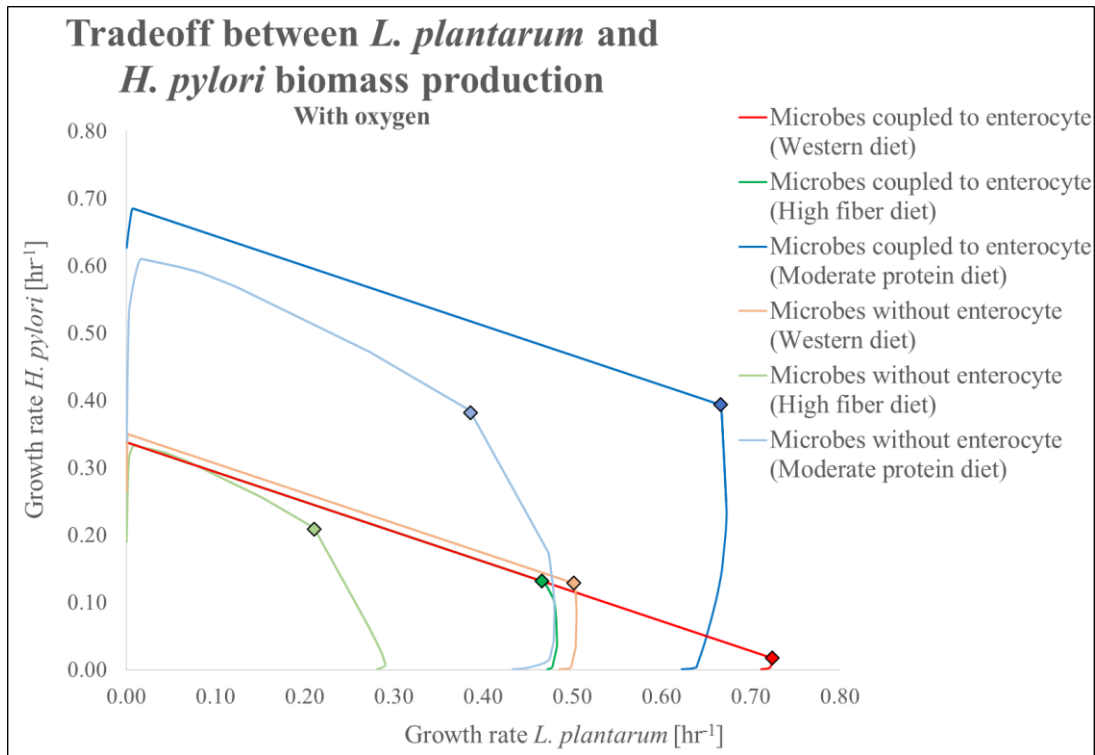

Figure S1.67

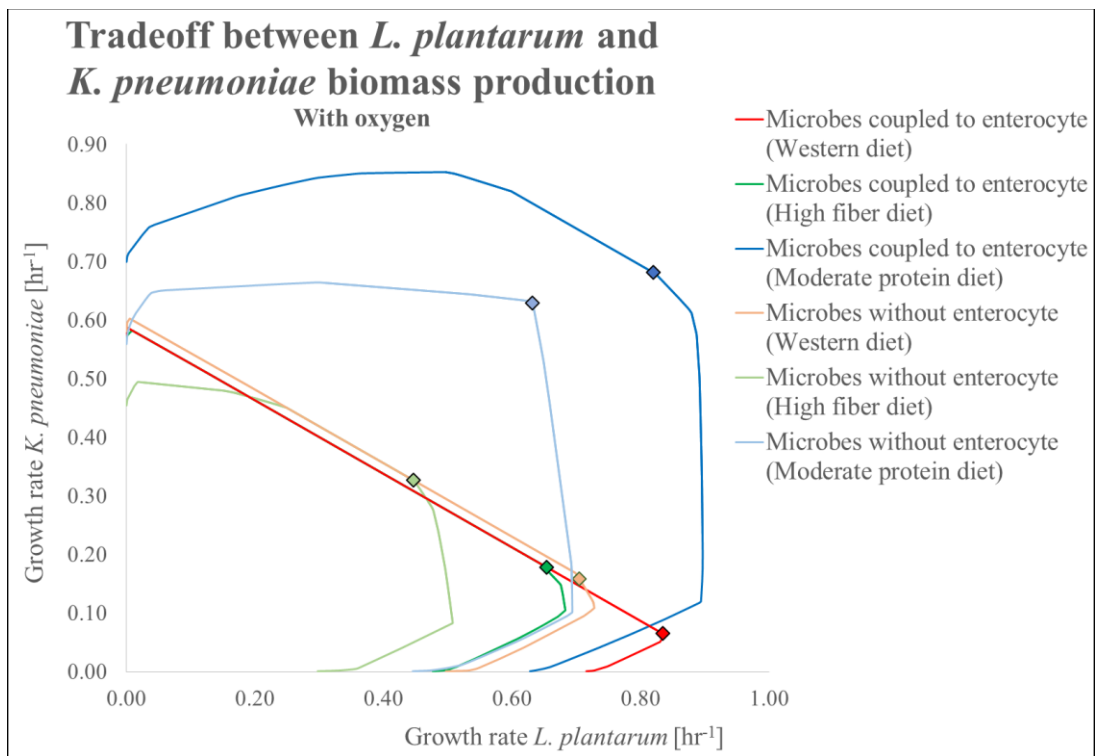

Figure S1.68



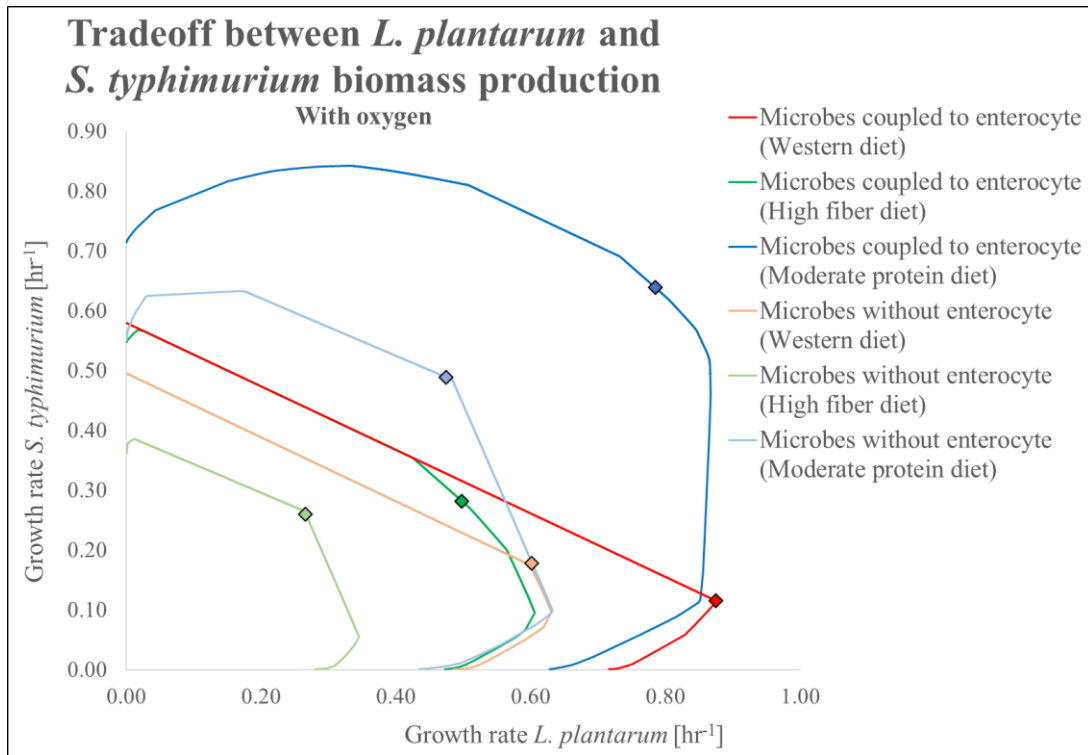

Figure S1.69

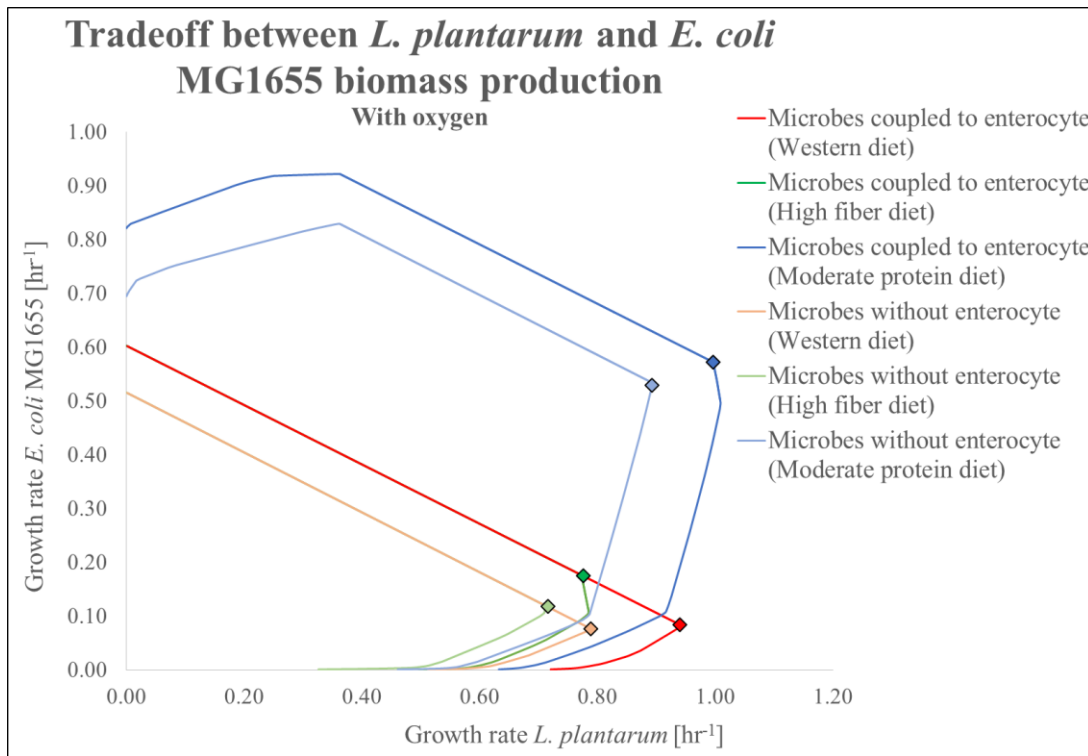

Figure S1.70

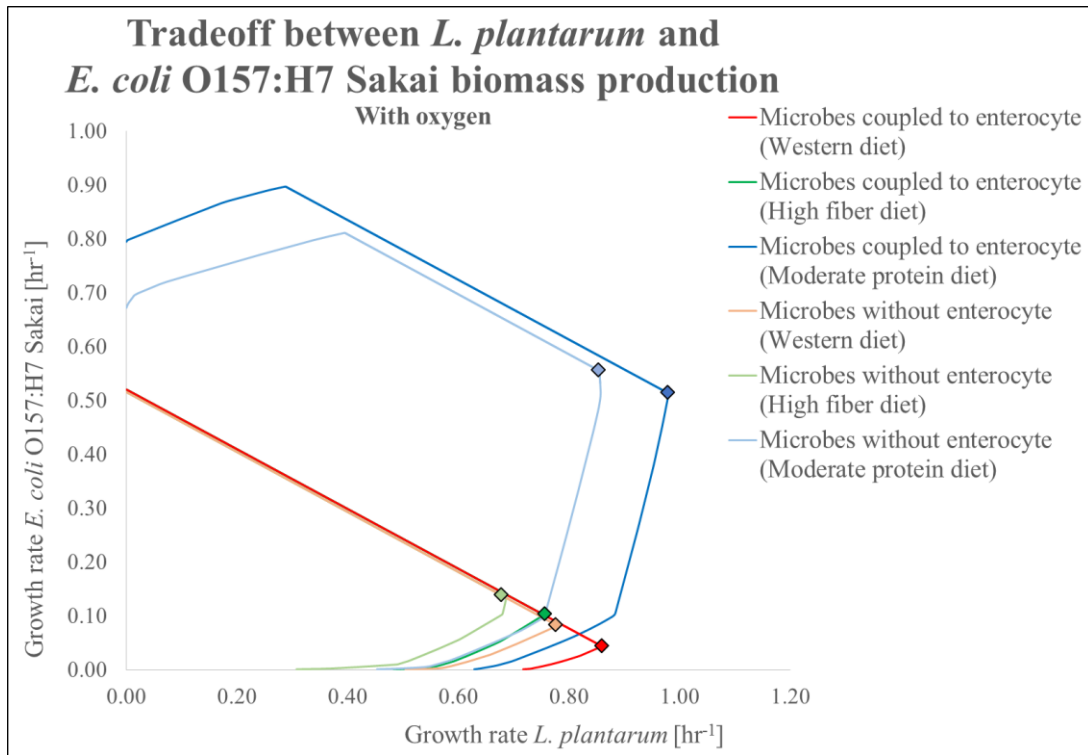

**Figure S1.71**

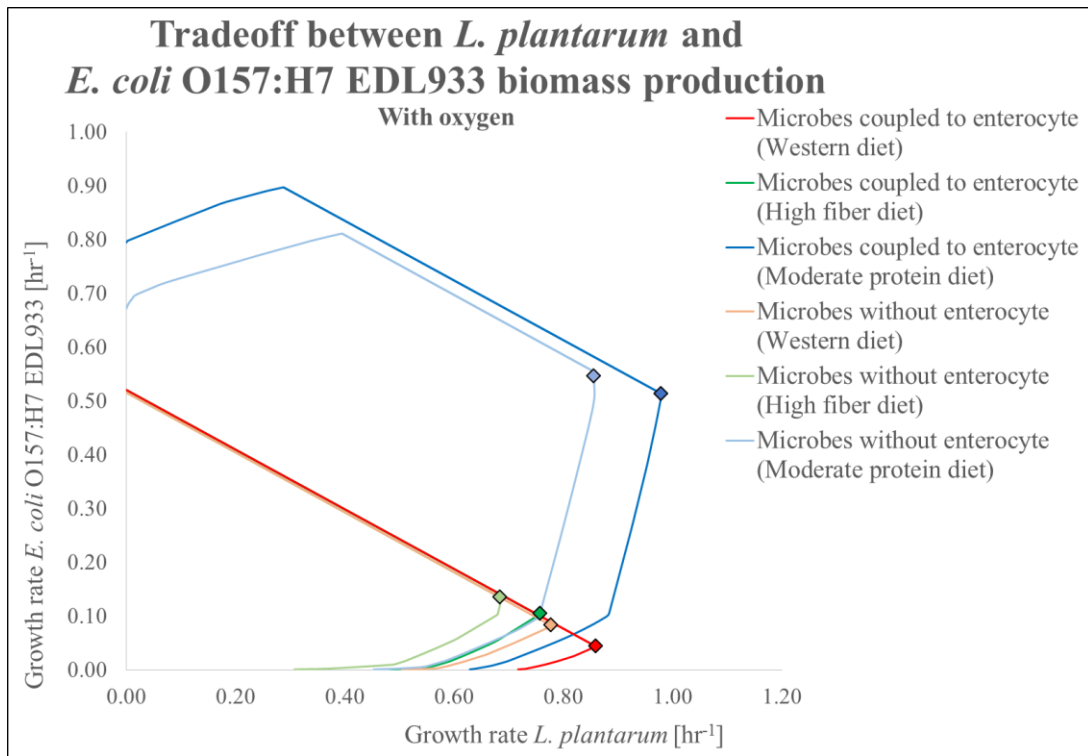

**Figure S1.72**

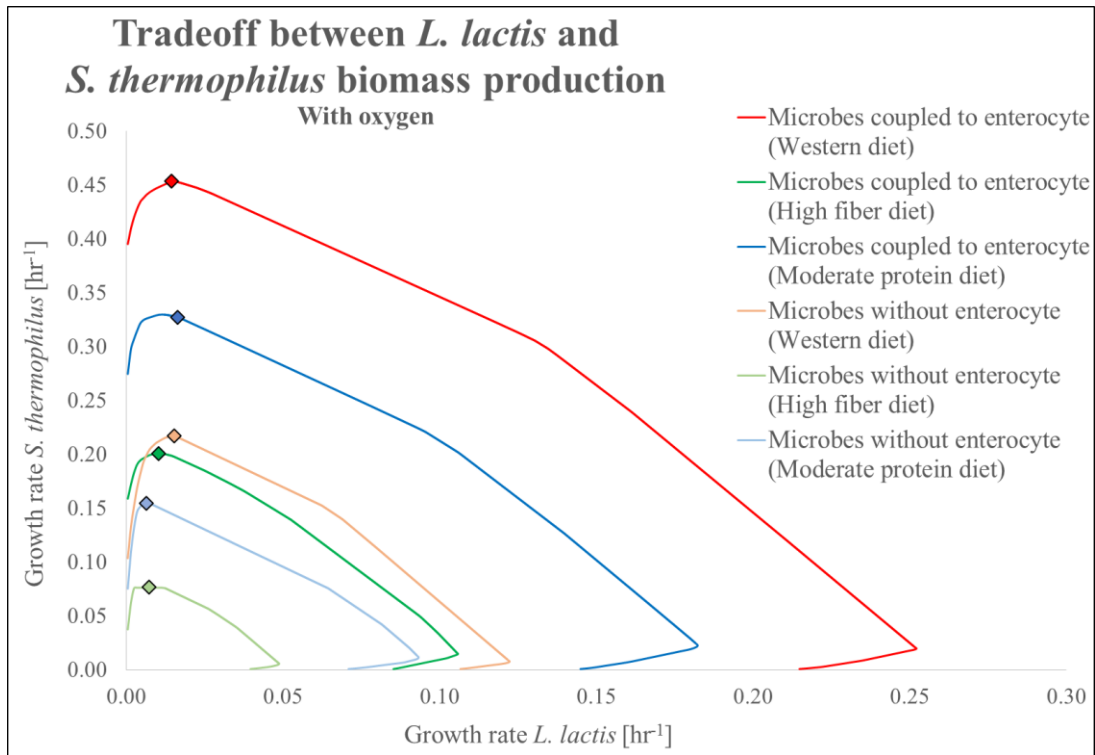

**Figure S1.73**

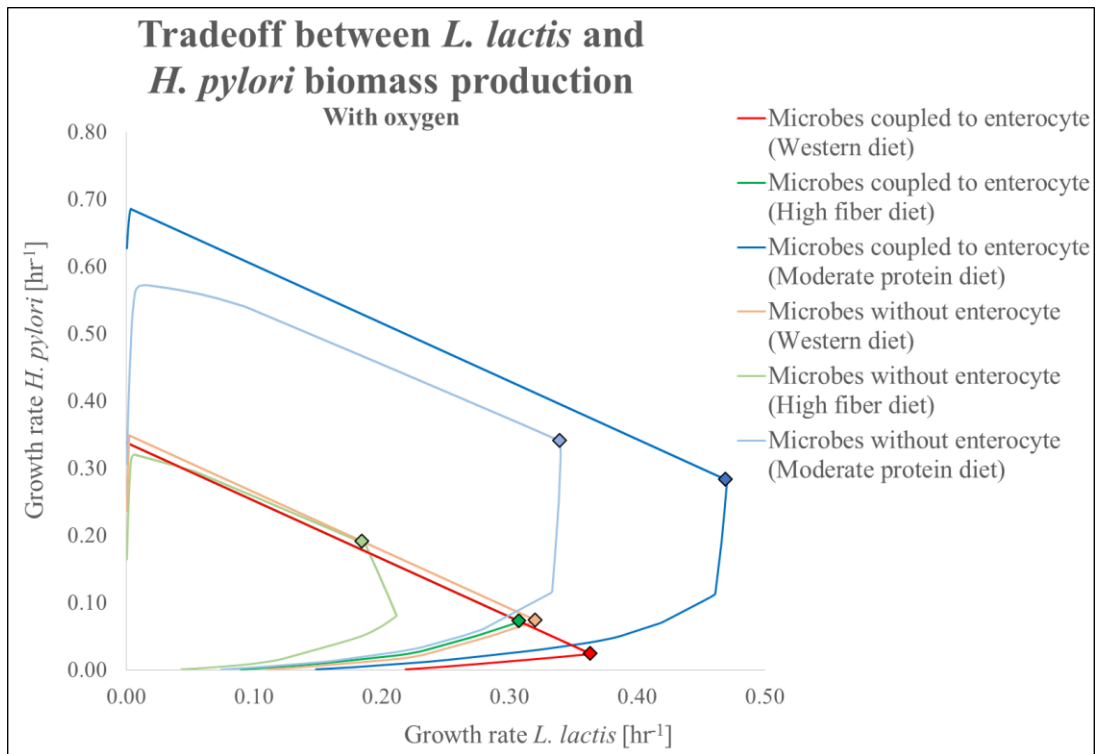

**Figure S1.74**

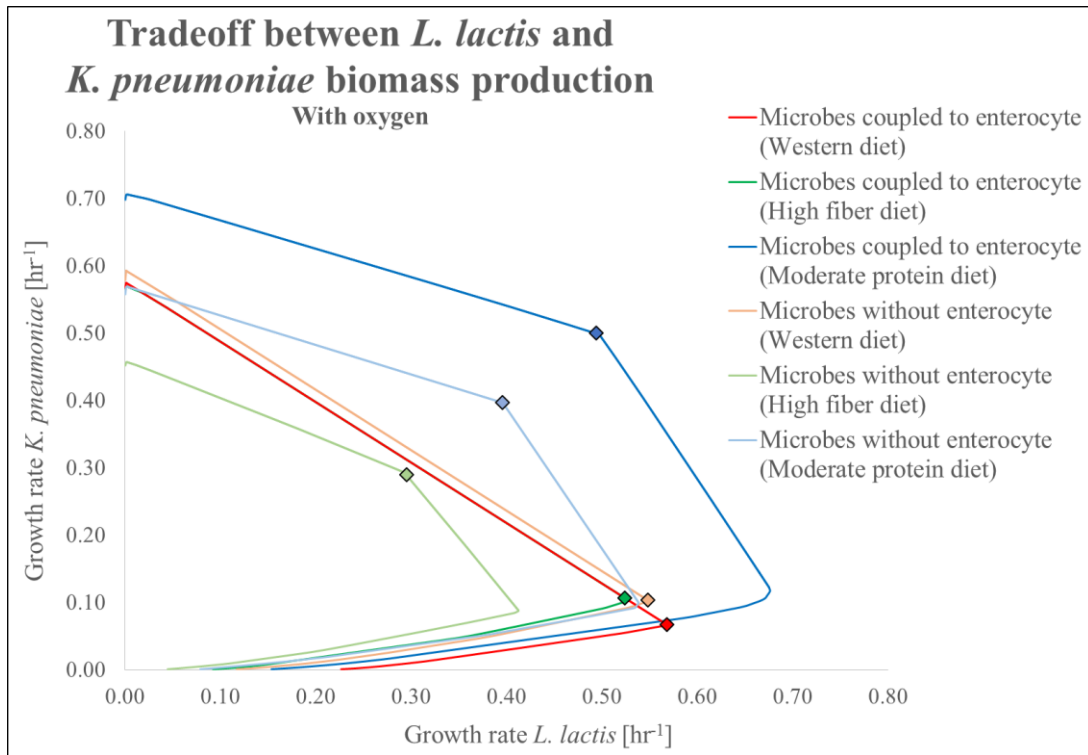

Figure S1.75

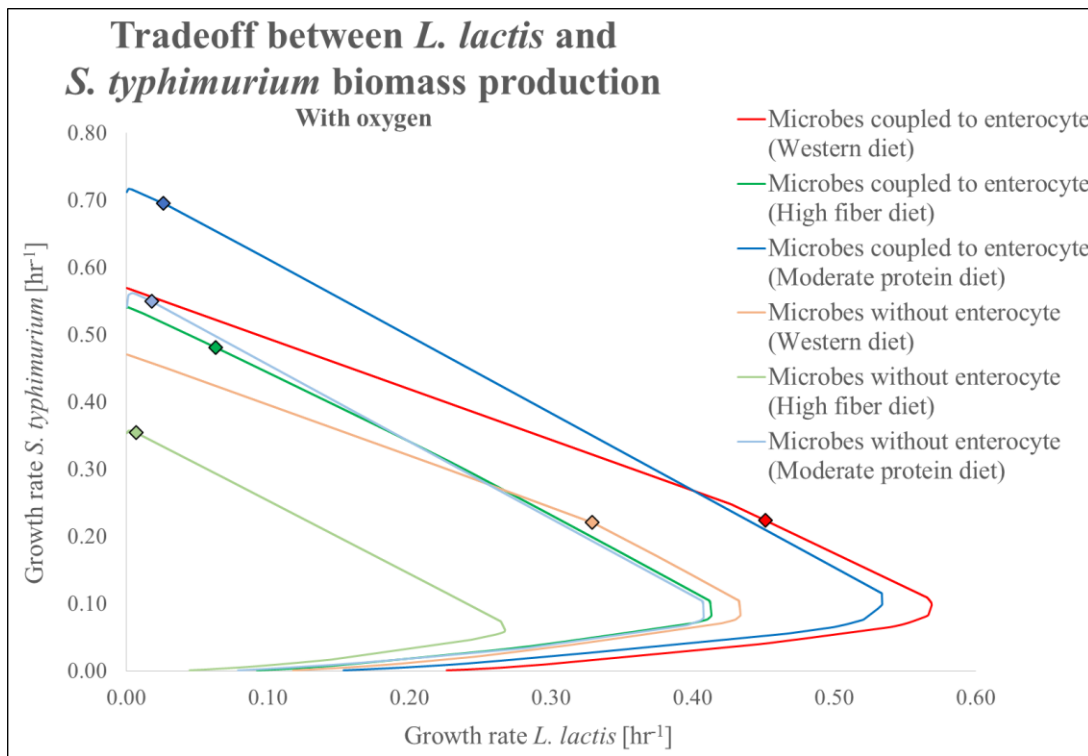

Figure S1.76

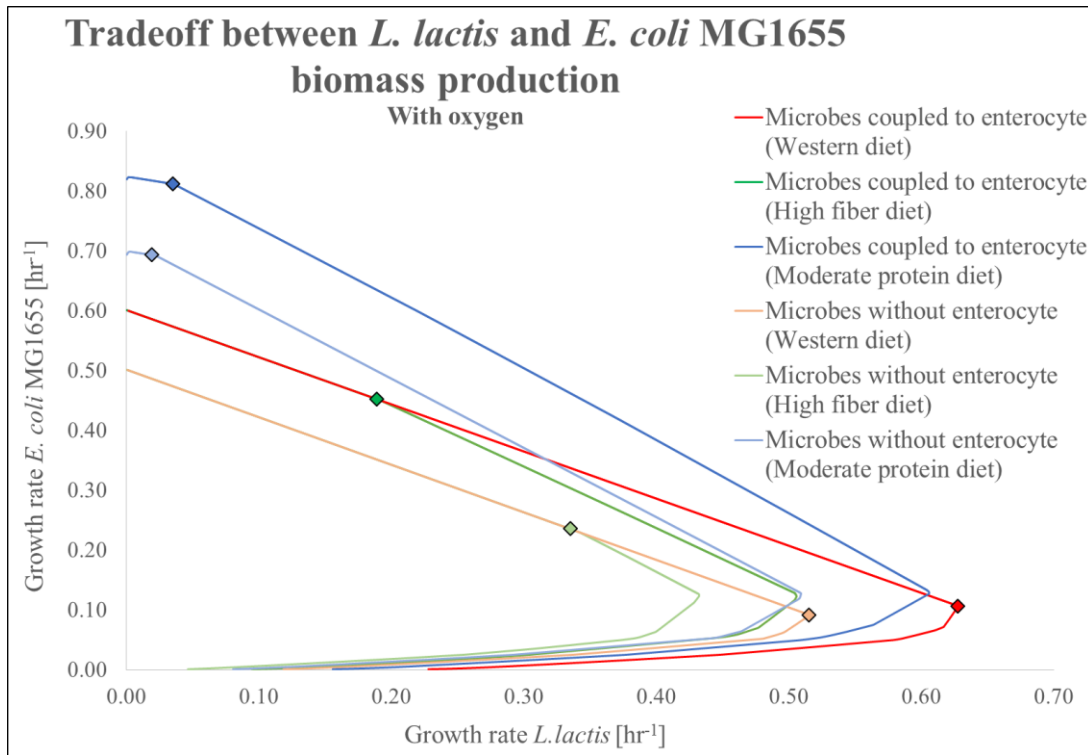

**Figure S1.77**

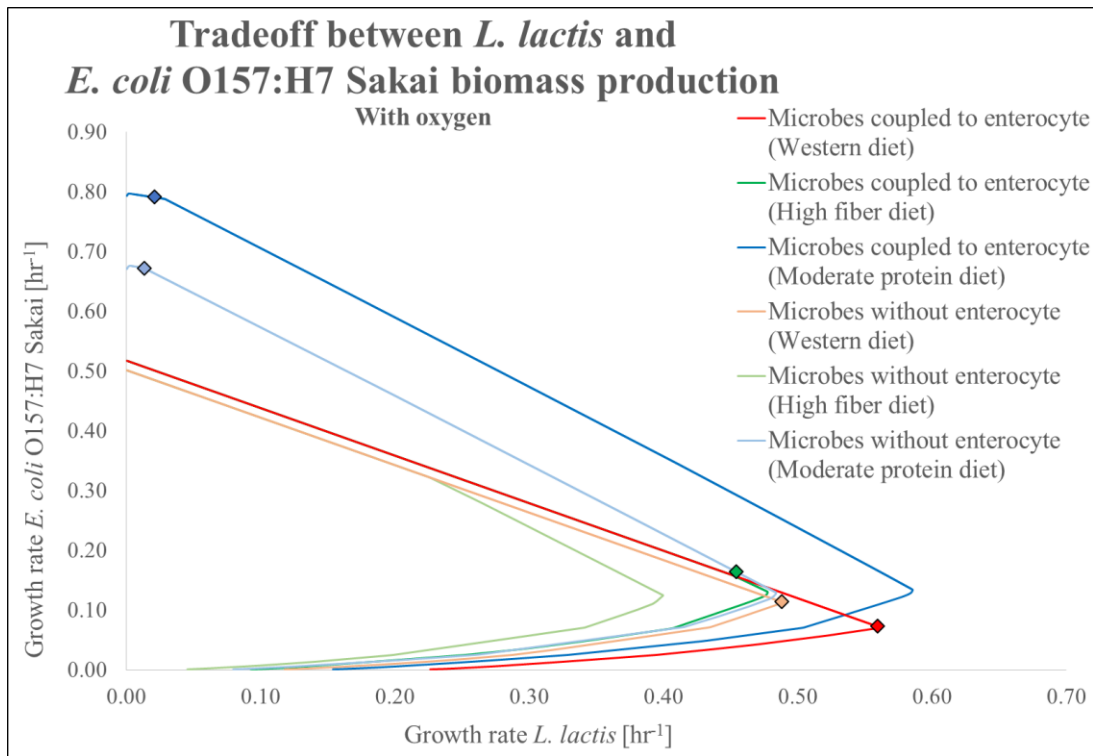

**Figure S1.78**

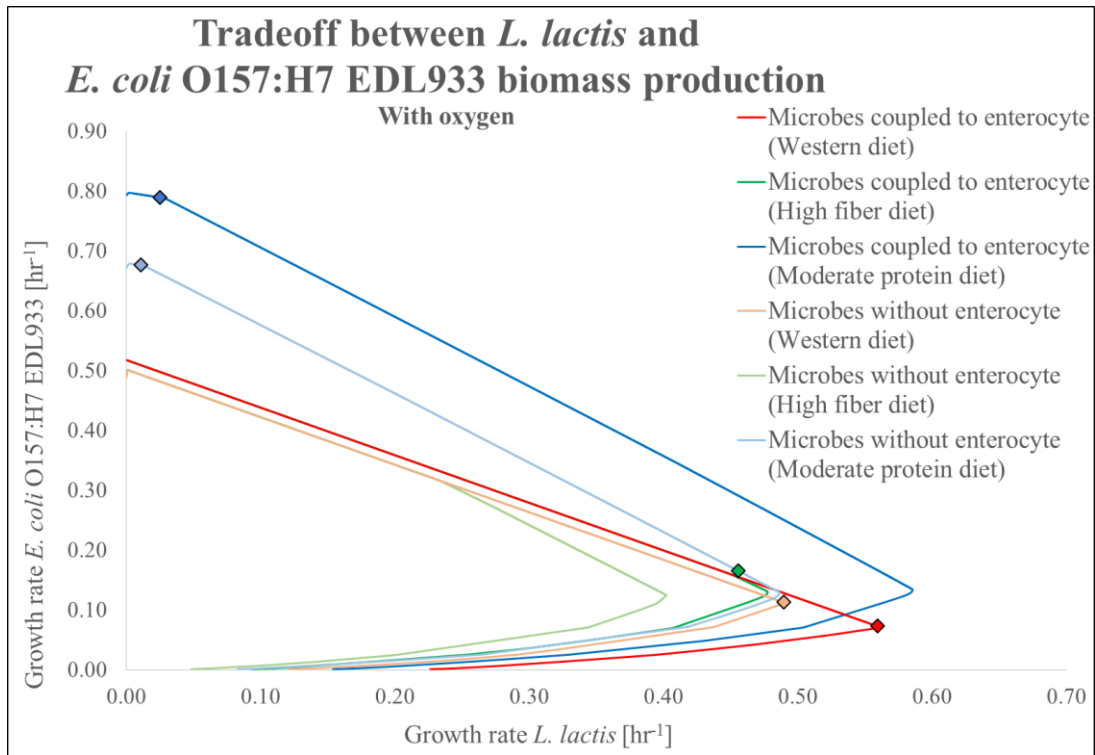

**Figure S1.79**

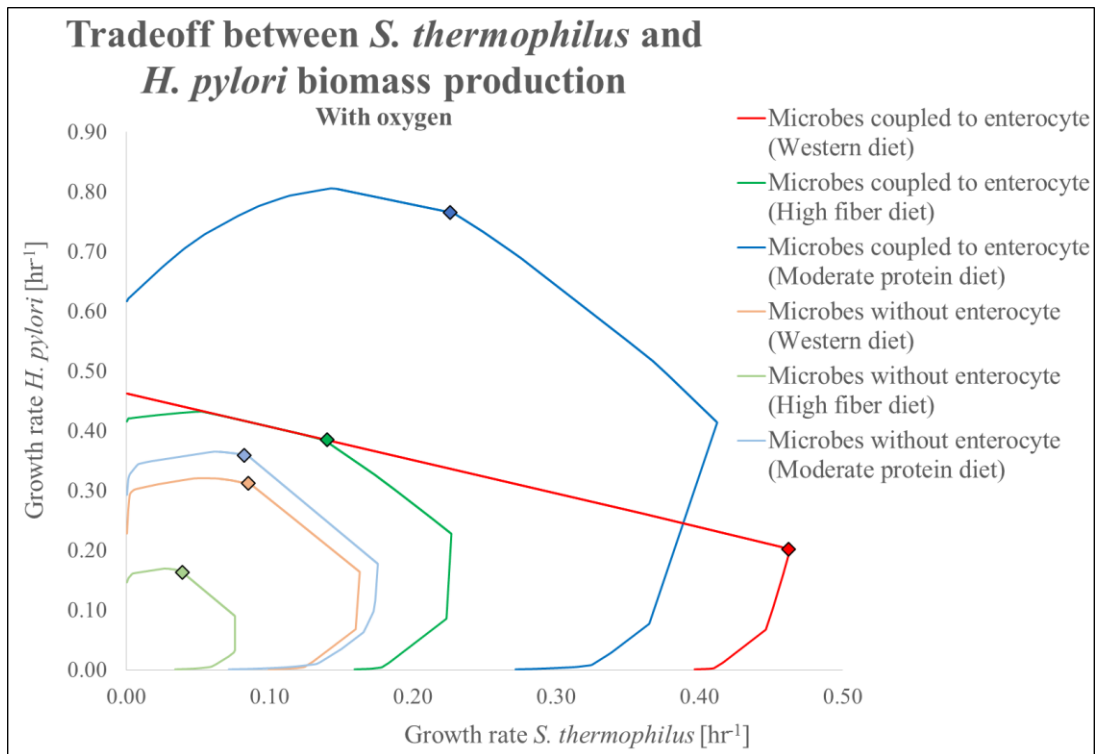

**Figure S1.80**

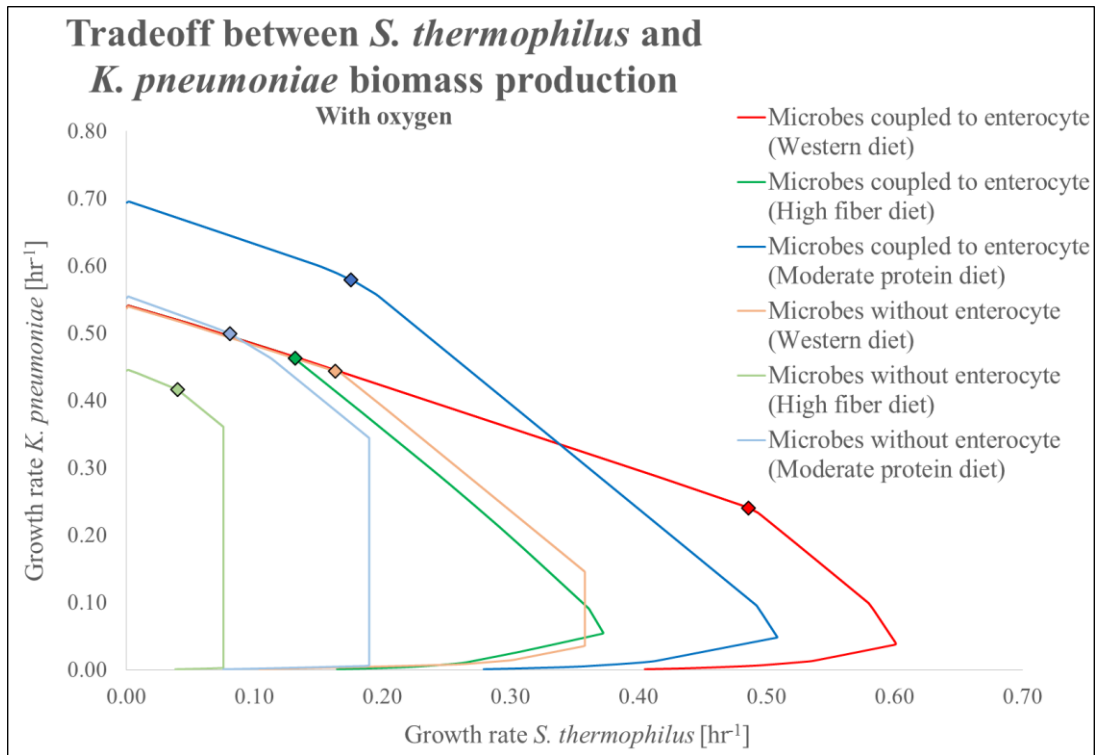

Figure S1.81

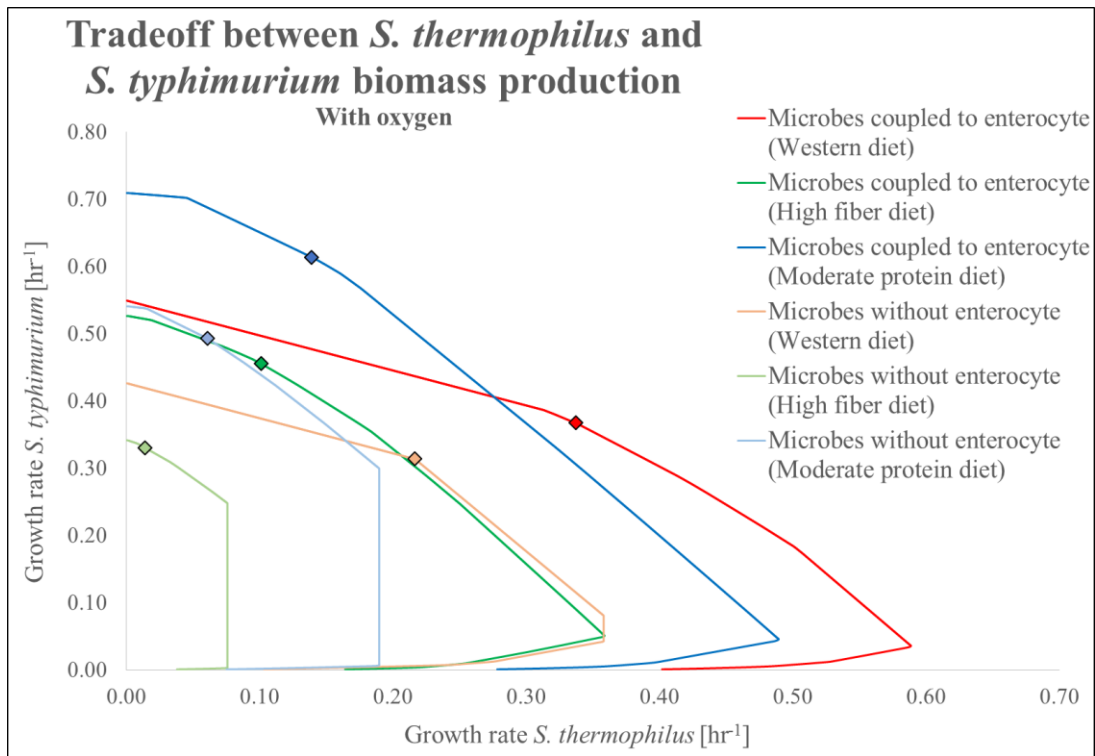

Figure S1.82

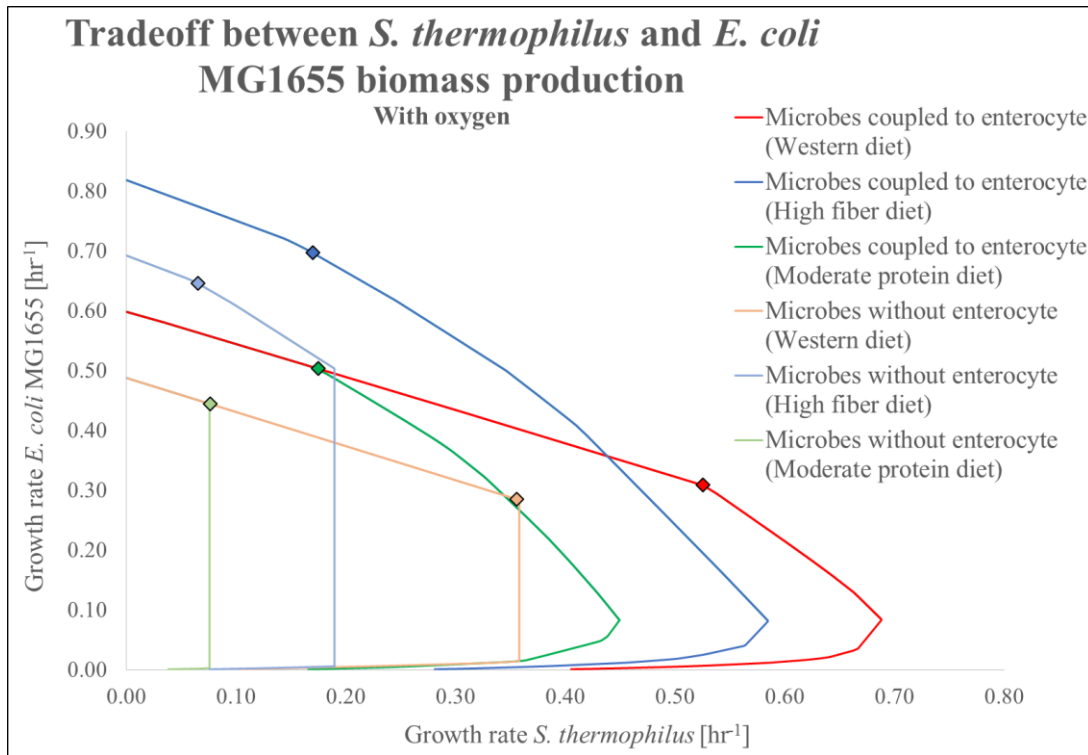

Figure S1.83

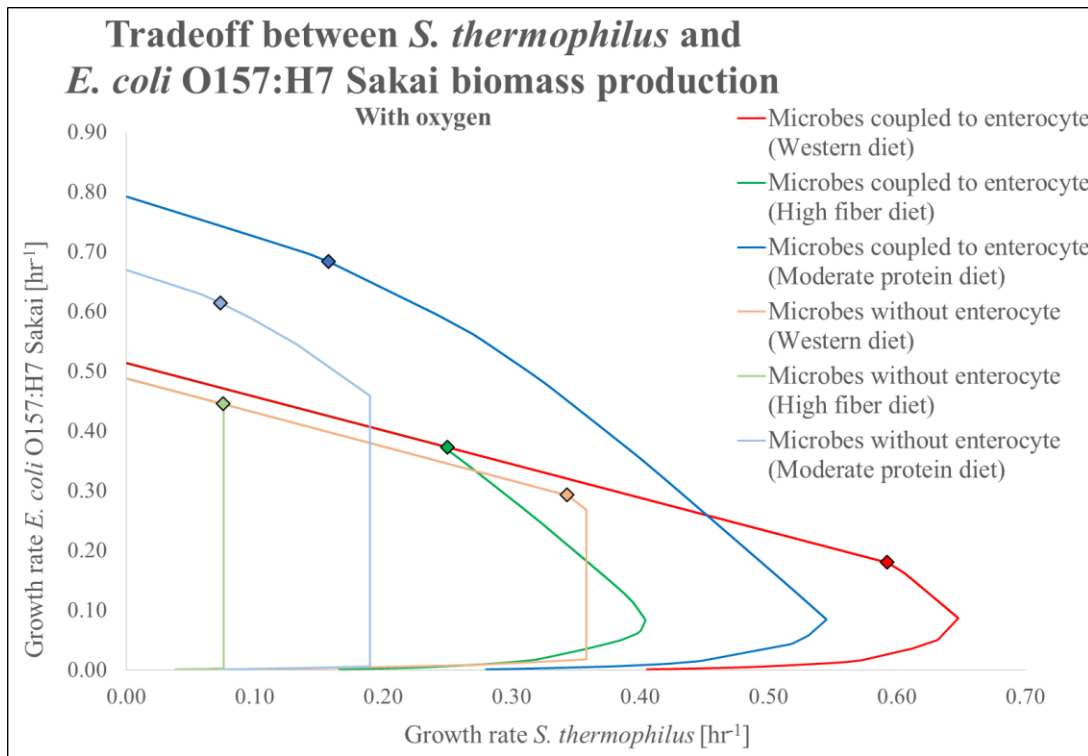

Figure S1.84



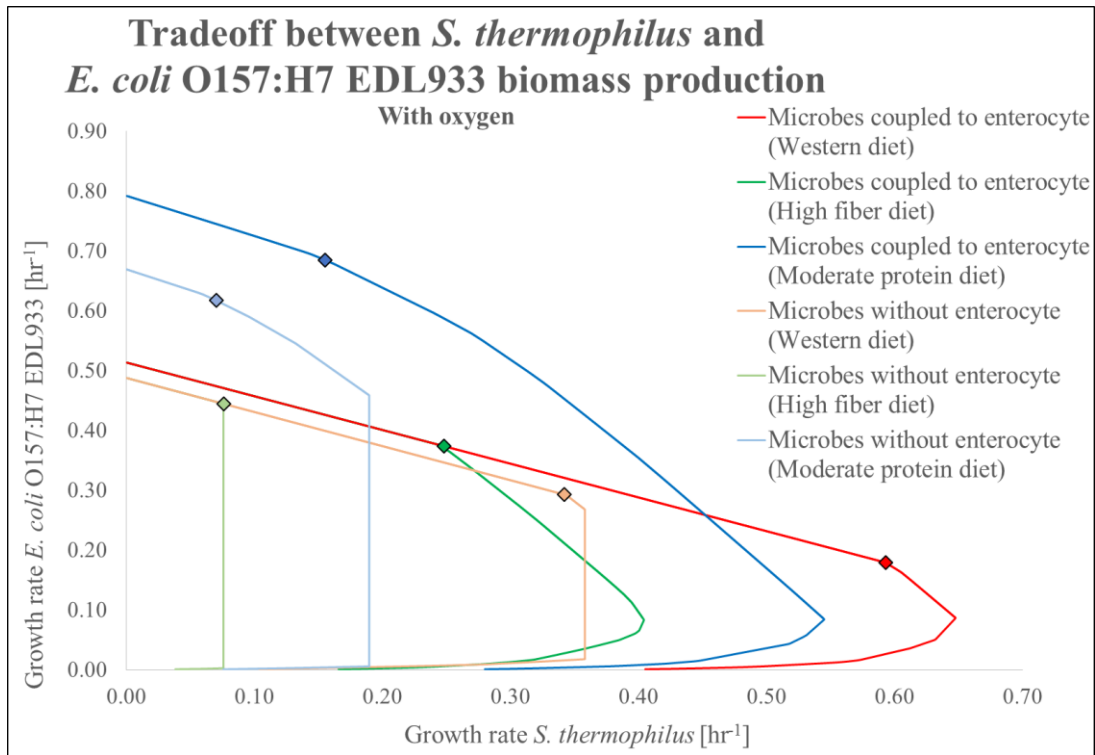

Figure S1.85

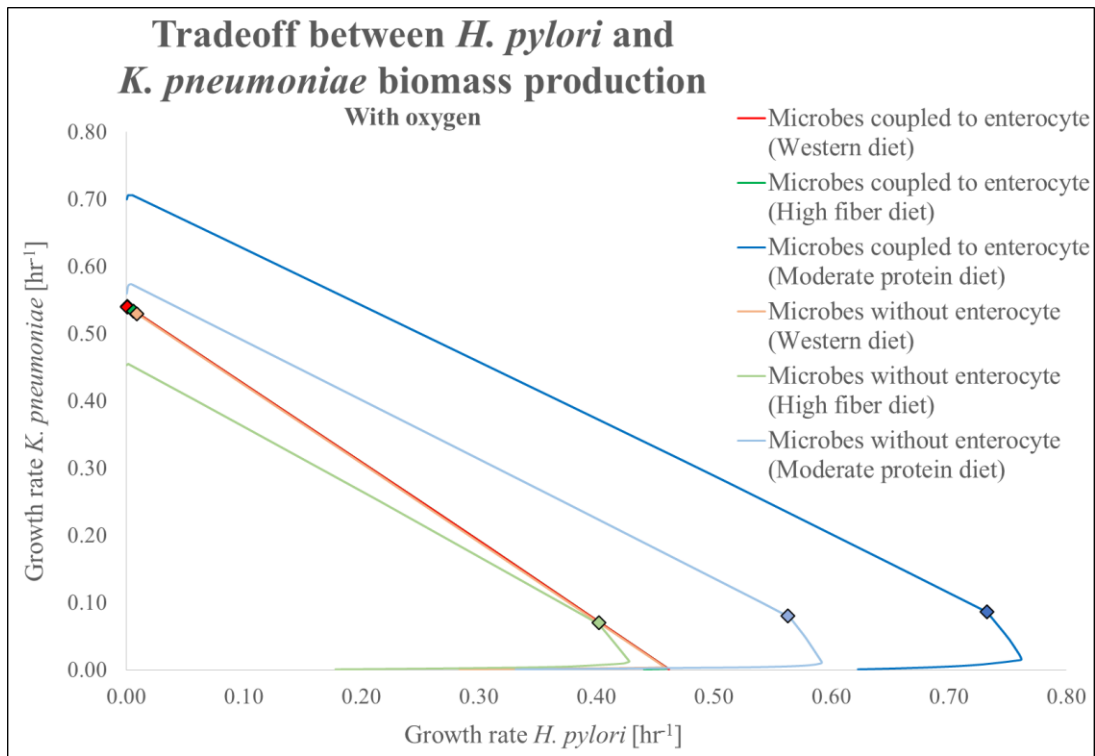

Figure S1.86

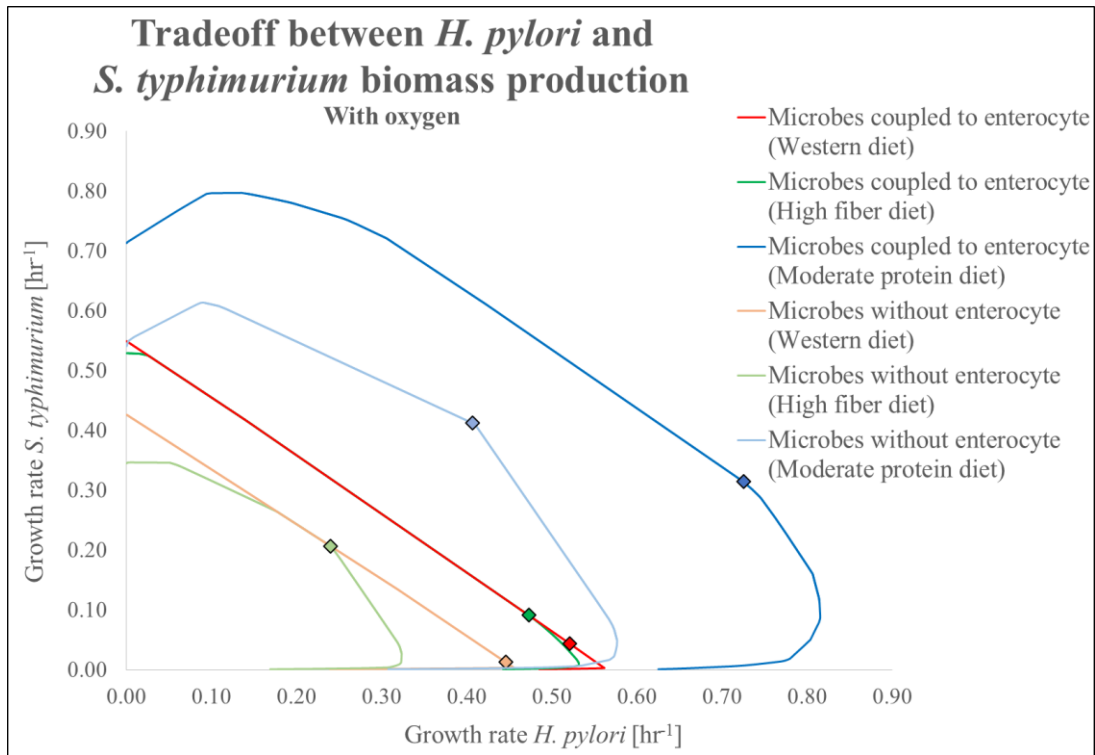

Figure S1.87

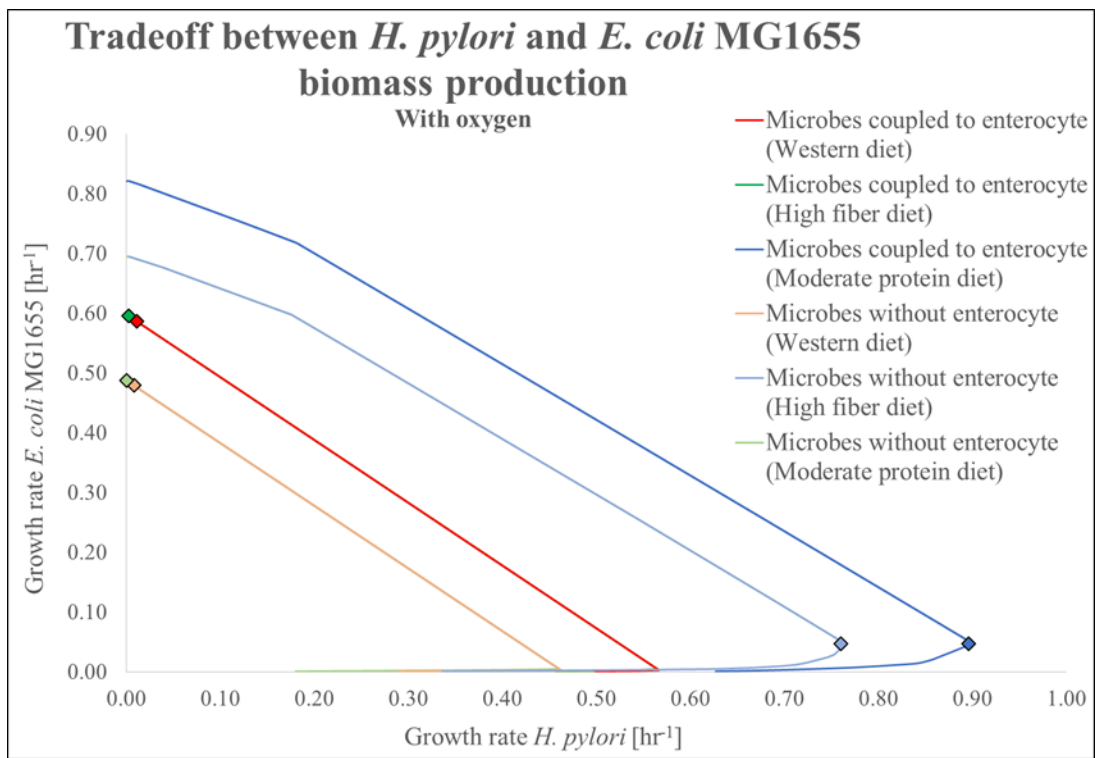

Figure S1.88

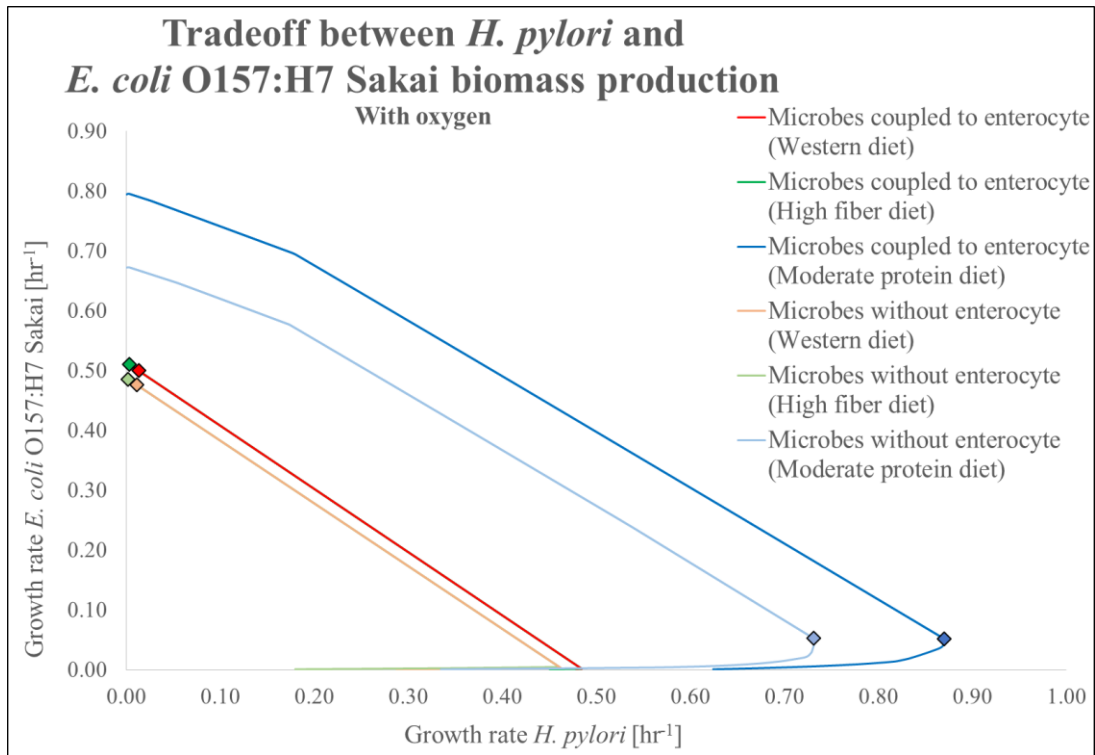

**Figure S1.89**

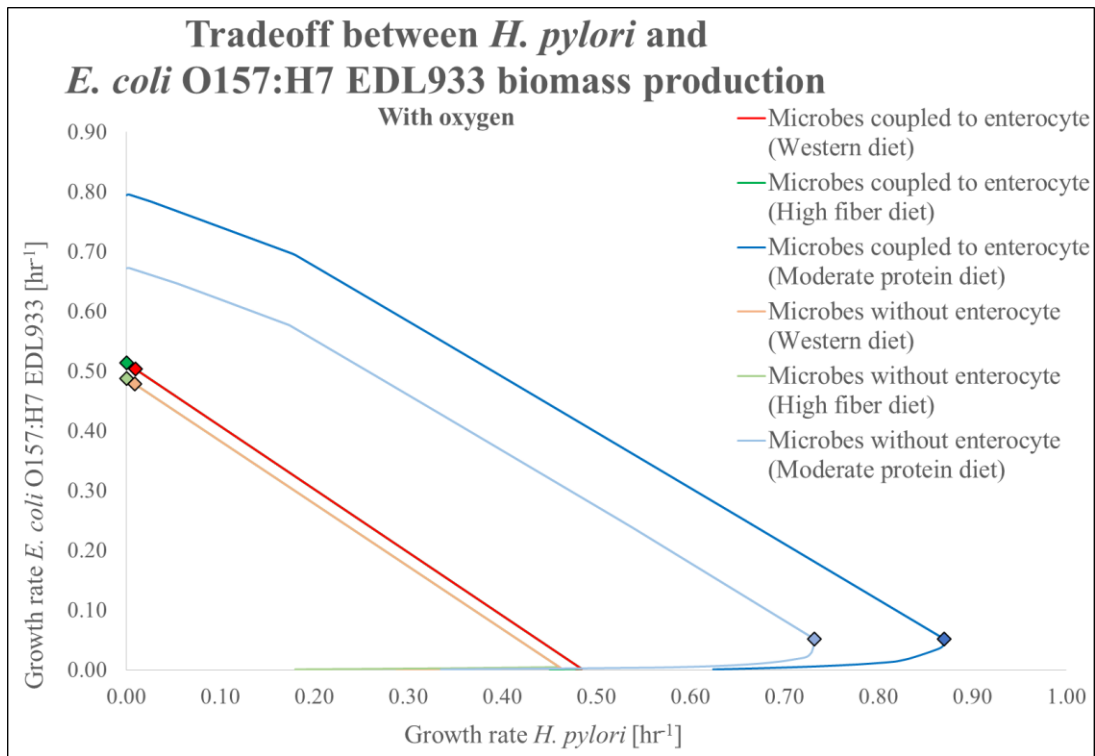

**Figure S1.90**

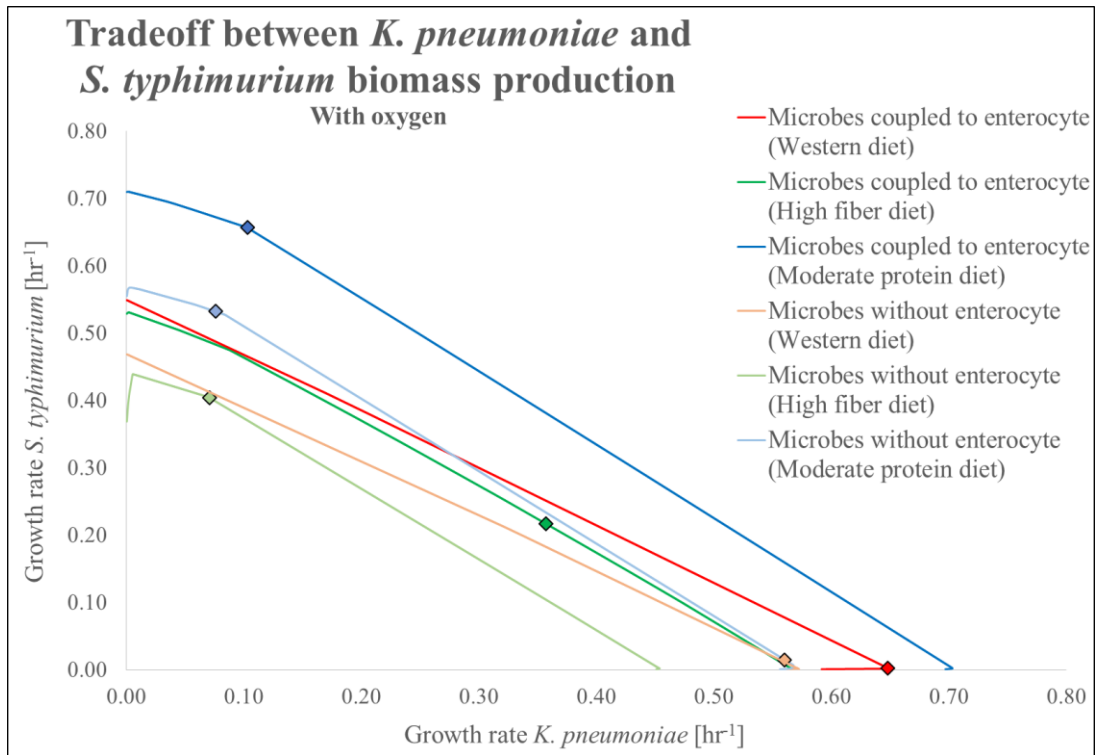

Figure S1.91

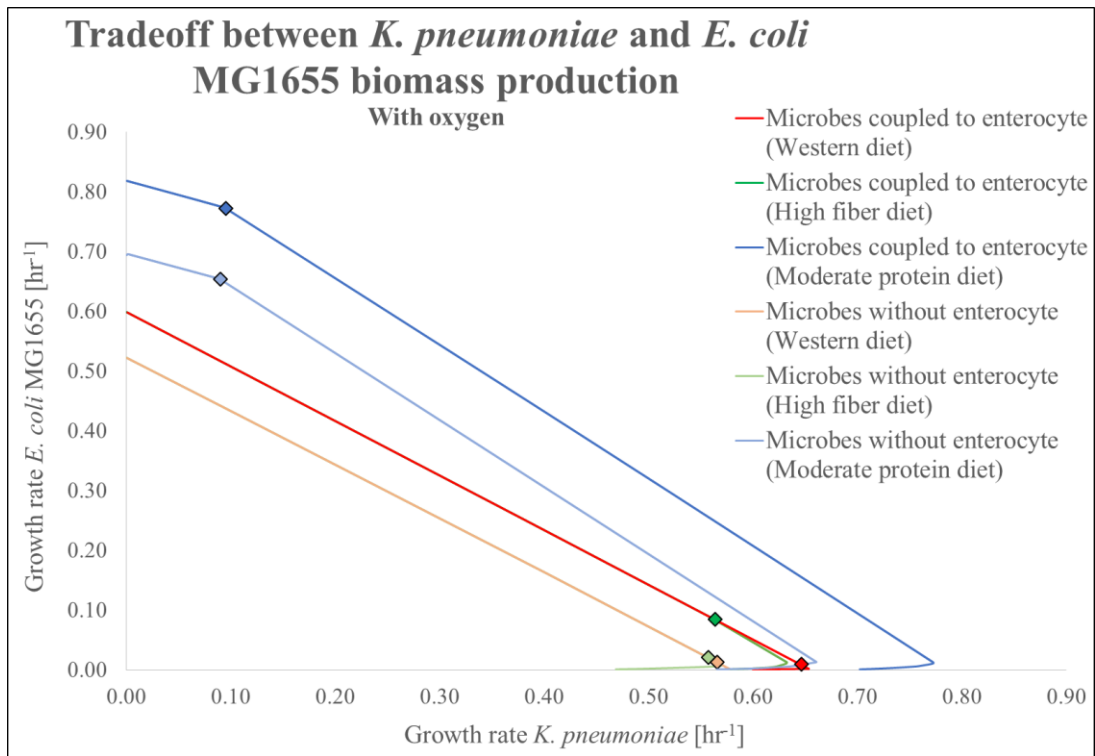

Figure S1.92

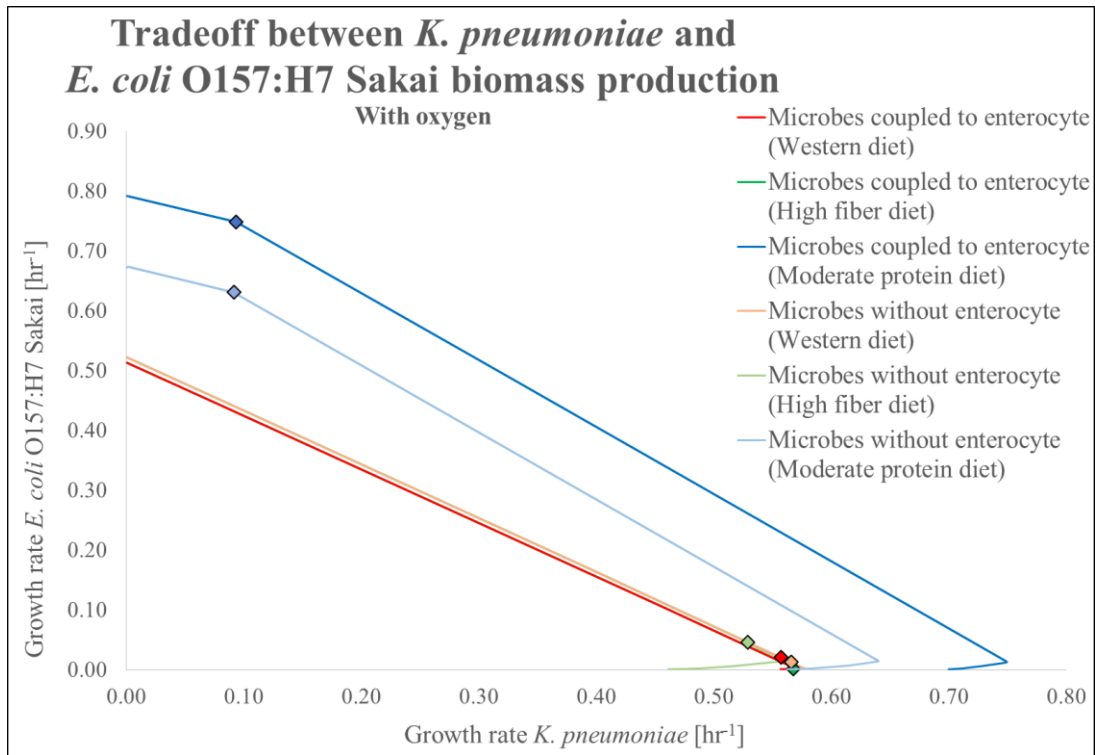

**Figure S1.93**

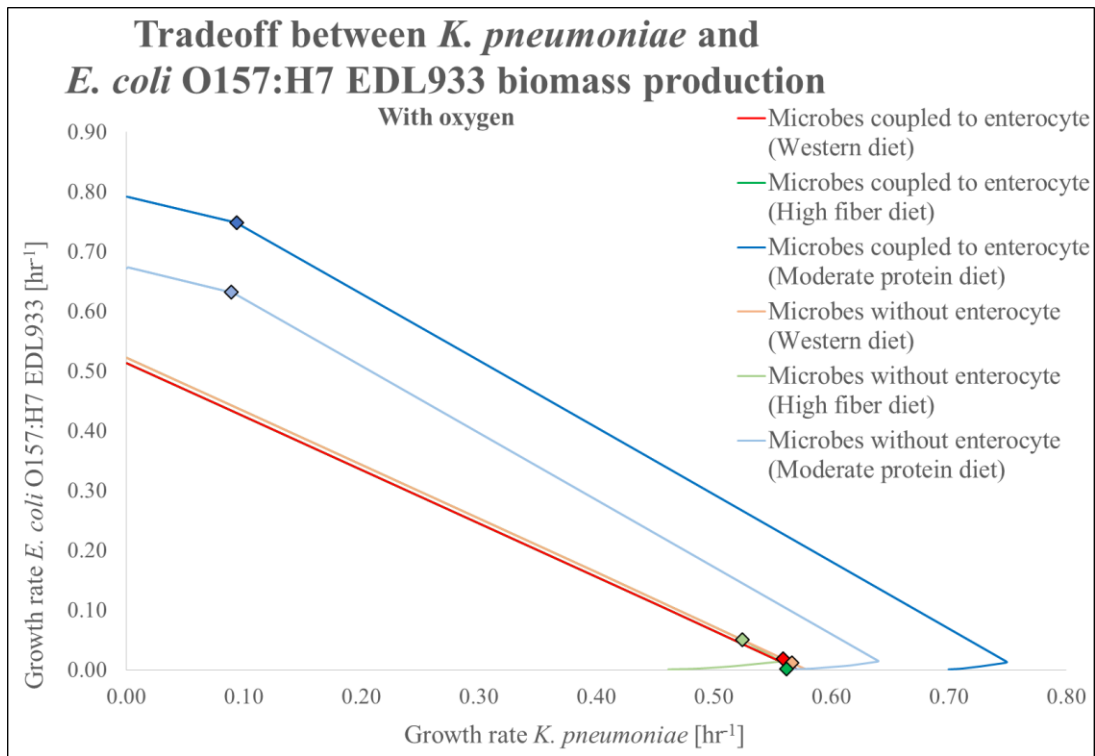

**Figure S1.94**

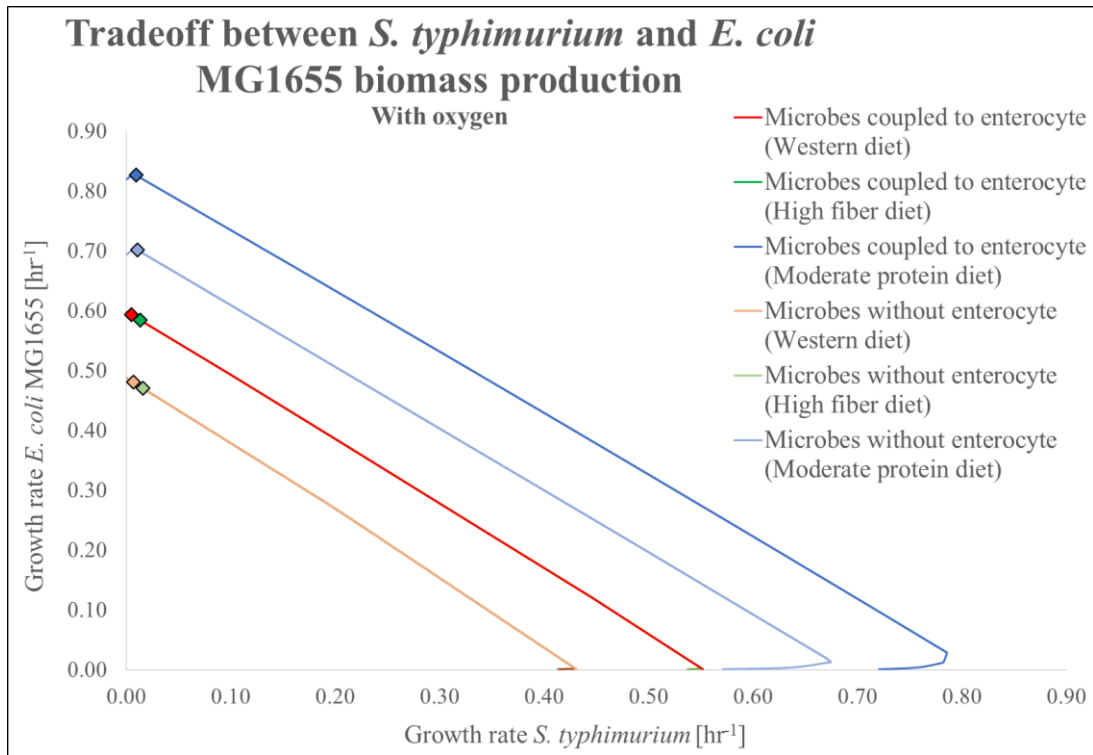

Figure S1.95

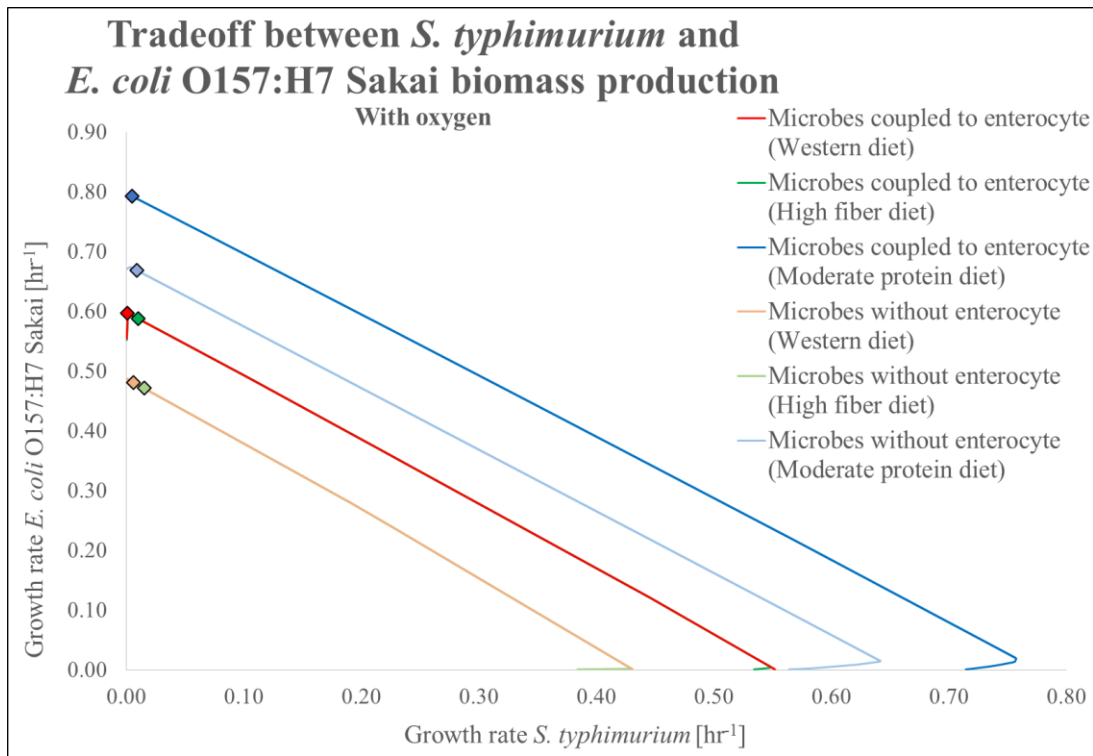

Figure S1.96

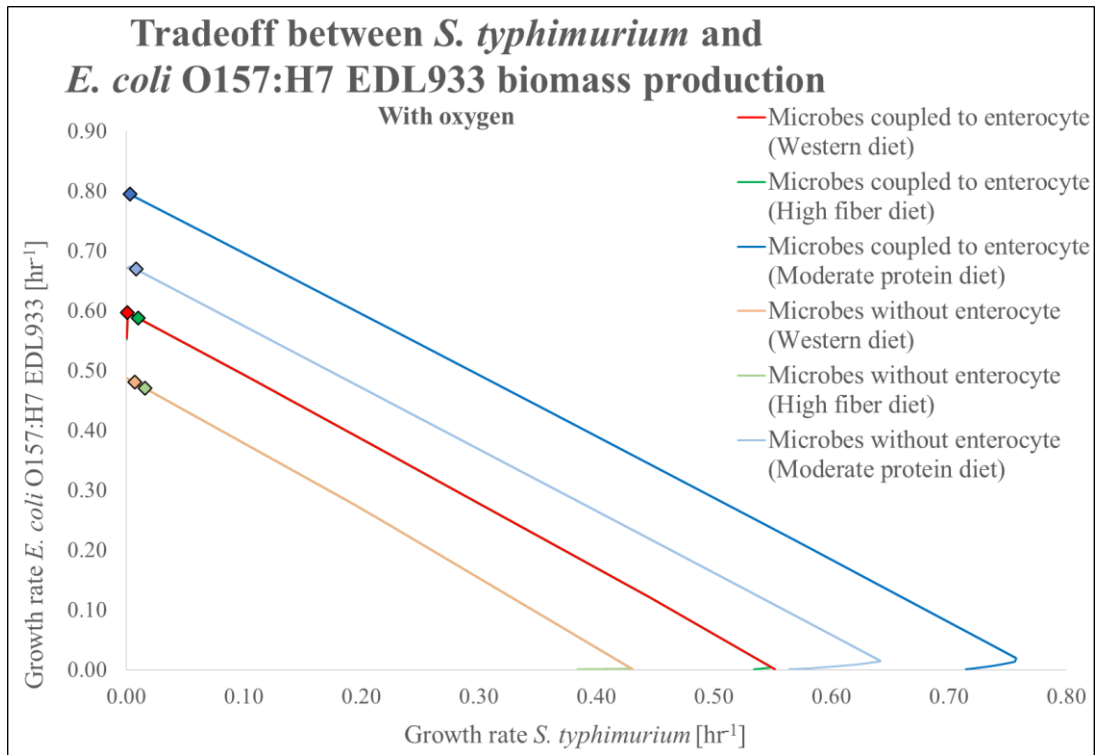

**Figure S1.97**

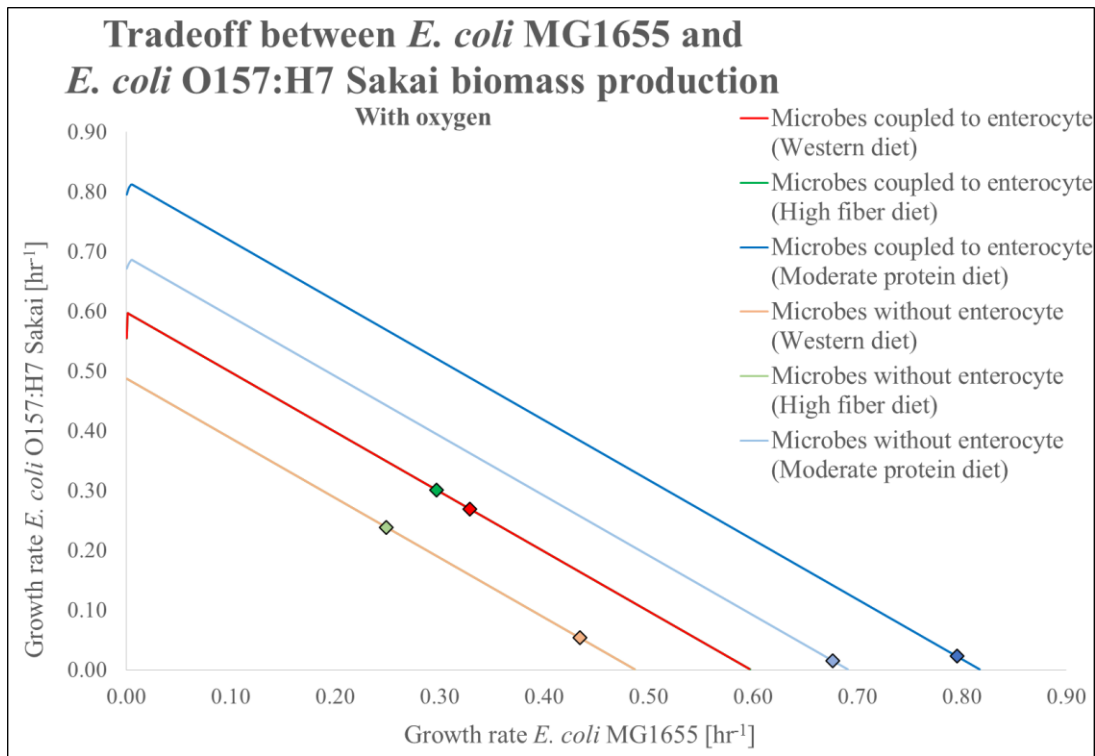

**Figure S1.98**

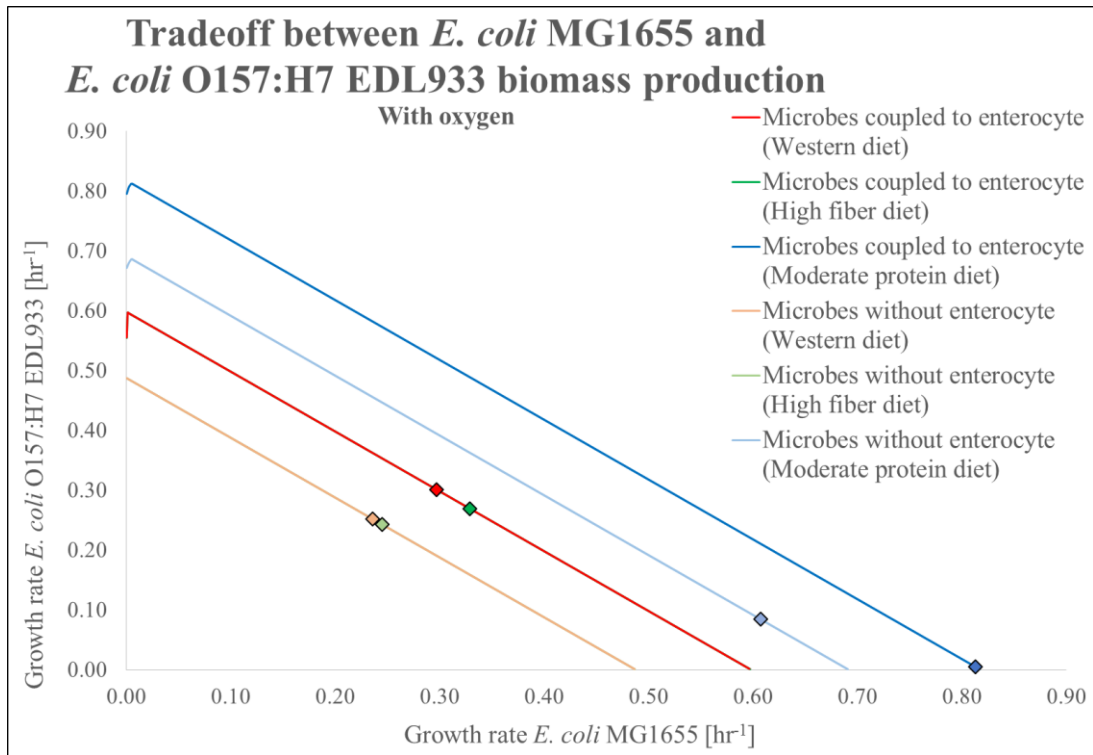

**Figure S1.99**

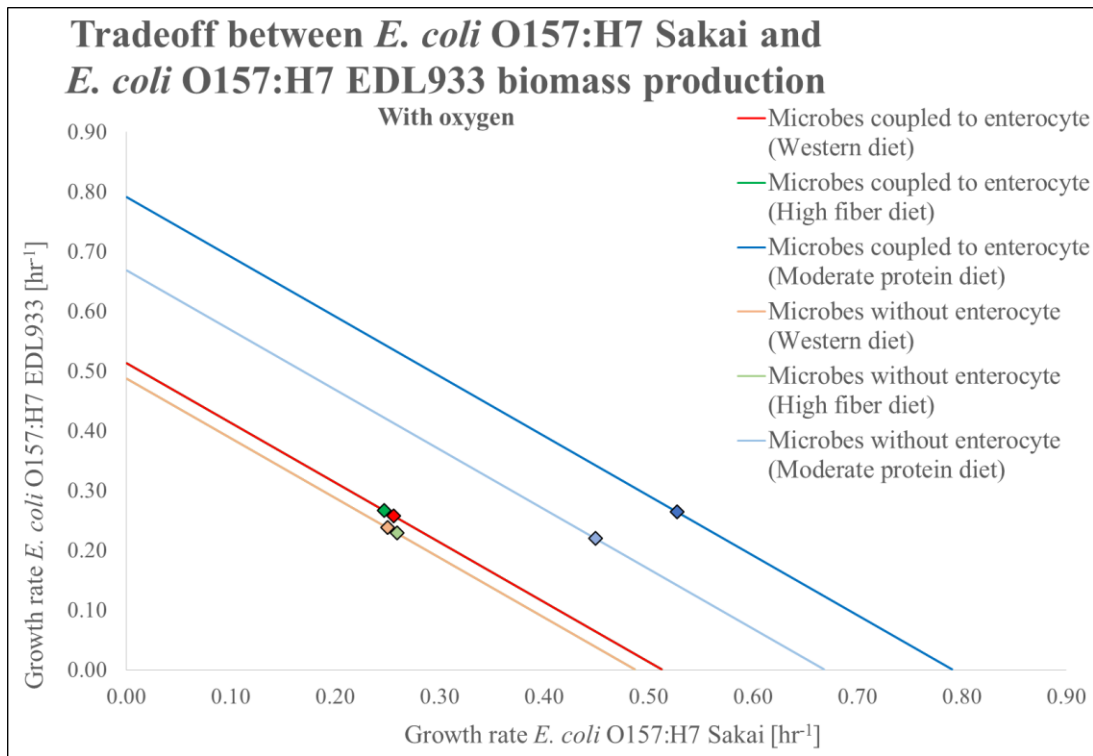

**Figure S1.100**



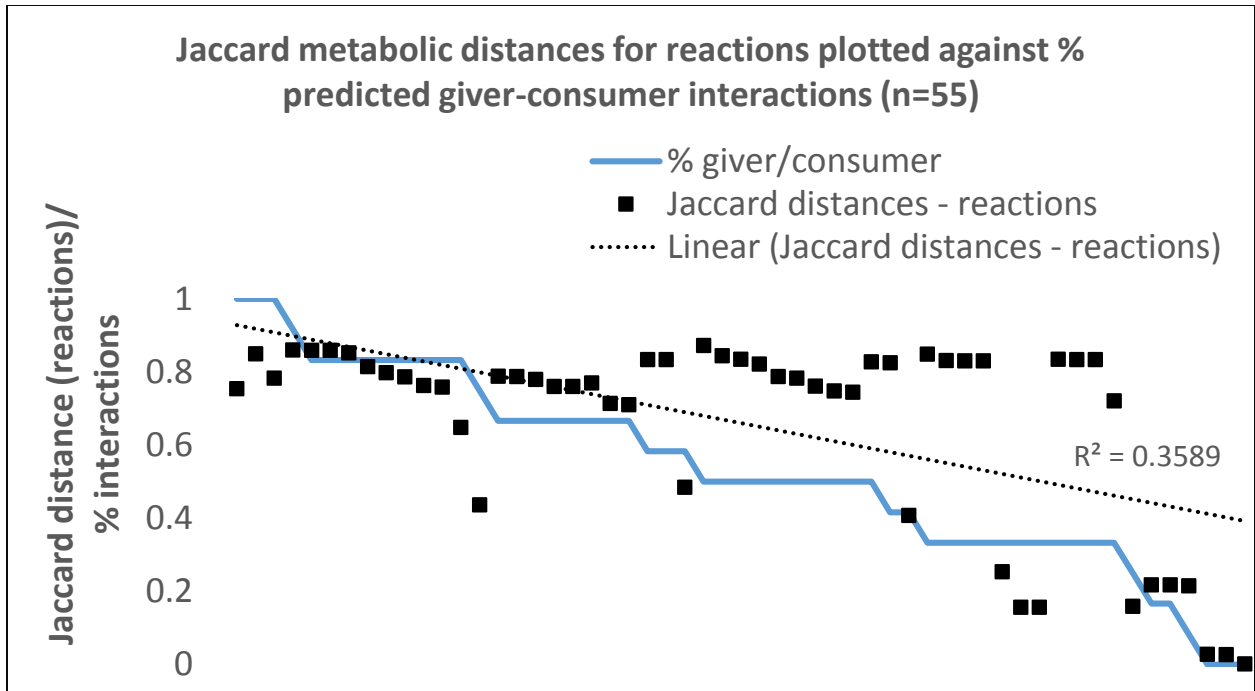

**Figure S2a):** Jaccard metabolic distances for each pair (reactions) plotted against percentage of giver/ consumer interactions for each pair, and display of R-squared value for the correlation between Jaccard distance and giver/ consumer interactions.

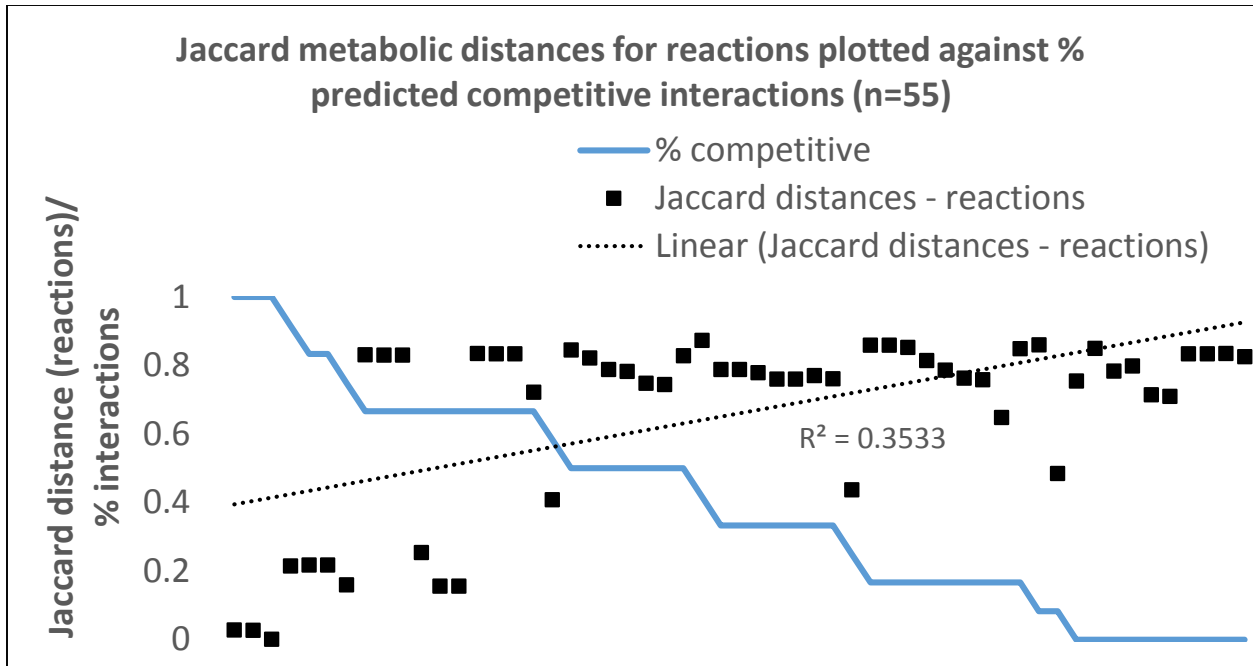

**Figure S2b):** Jaccard metabolic distances for each pair (reactions) plotted against percentage of competitive interactions for each pair, and display of R-squared value for the correlation between Jaccard distance and competitive interactions.

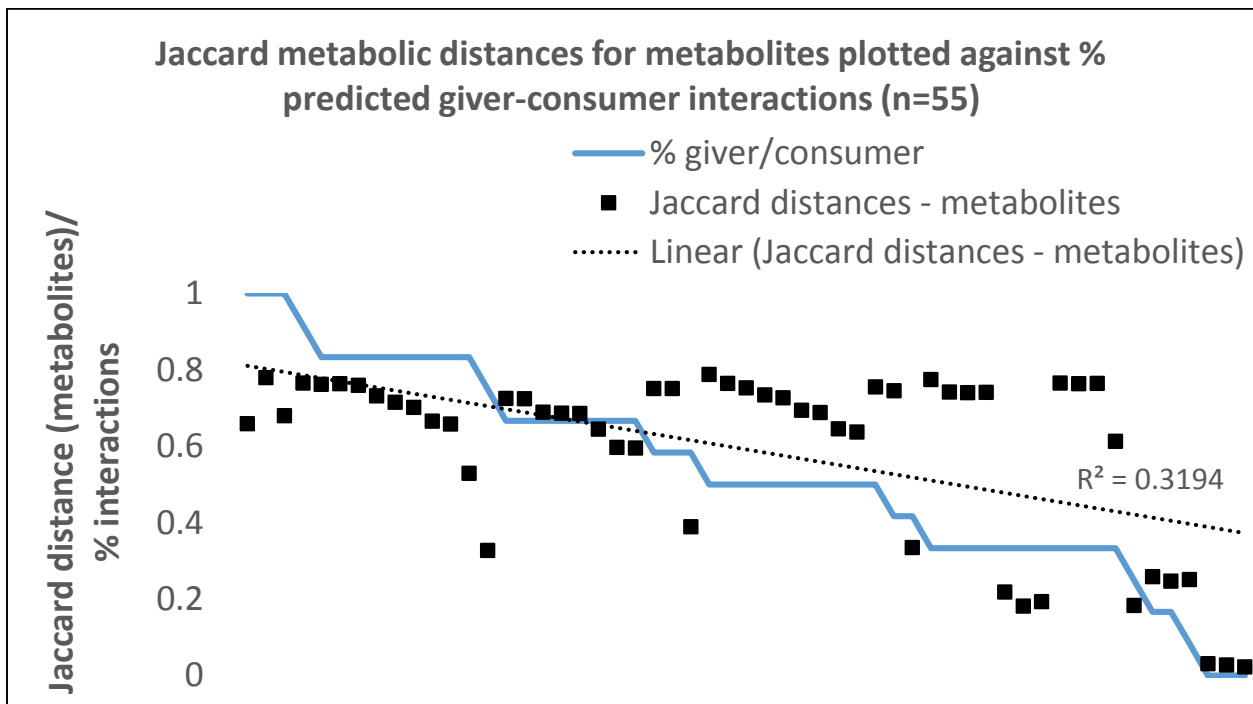

**Figure S2c):** Jaccard metabolic distances for each pair (metabolites) plotted against percentage of giver/ consumer interactions for each pair, and display of R-squared value for the correlation between Jaccard distance and giver/ consumer interactions.

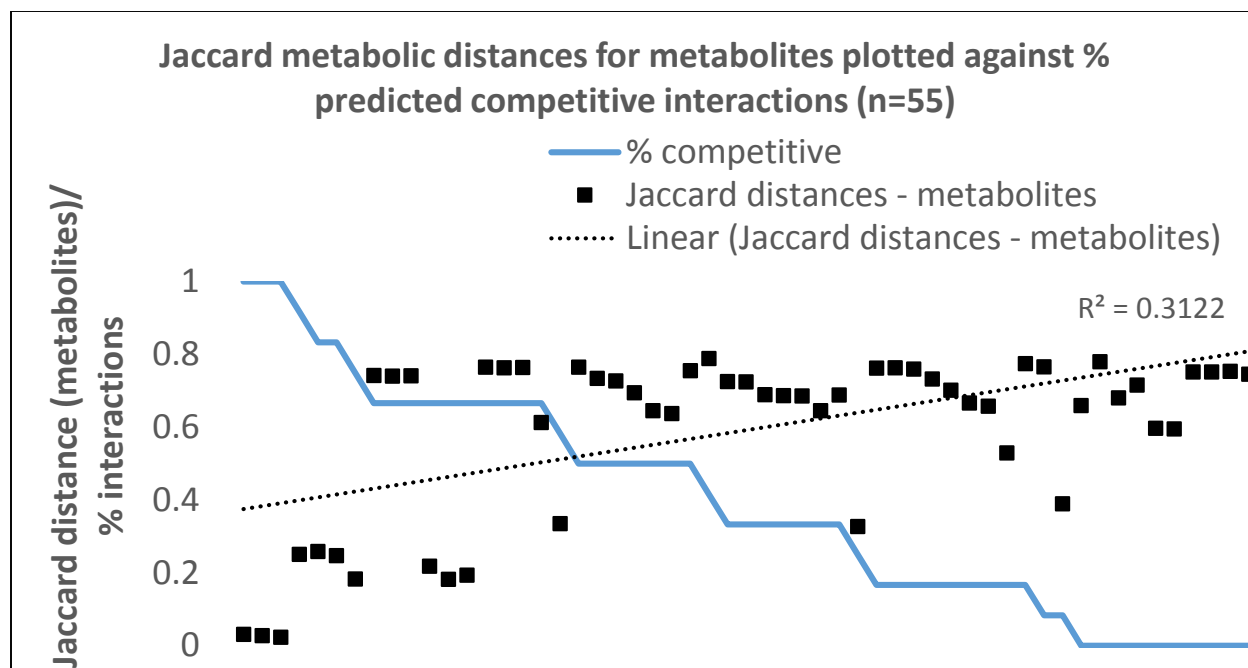

**Figure S2d):** Jaccard metabolic distances for each pair (metabolites) plotted against percentage of competitive interactions for each pair, and display of R-squared value for the correlation between Jaccard distance and competitive interactions.

| # exchange strategies     |                        | - oxygen               |    |    |        |    |    | + oxygen |    |    |        |    |    | Total # of scenarios |    |    |    |
|---------------------------|------------------------|------------------------|----|----|--------|----|----|----------|----|----|--------|----|----|----------------------|----|----|----|
|                           |                        | - sIEC                 |    |    | + sIEC |    |    | - sIEC   |    |    | + sIEC |    |    |                      |    |    |    |
| 0                         | 1                      | 2                      | 3  | WD | HFD    | PD | WD | HFD      | PD | WD | HFD    | PD | WD | HFD                  | PD |    |    |
| M1                        | M2                     |                        |    |    |        |    |    |          |    |    |        |    |    |                      |    |    |    |
| <i>B. thetaotaomicron</i> | <i>F. prausnitzii</i>  |                        |    |    |        |    |    |          |    |    |        |    |    |                      |    | 12 |    |
|                           | <i>L. plantarum</i>    |                        |    |    |        |    |    |          |    |    |        |    |    |                      |    | 12 |    |
|                           | <i>L. lactis</i>       |                        |    |    |        |    |    |          |    |    |        |    |    |                      |    | 12 |    |
|                           | <i>S. thermophilus</i> |                        |    |    |        |    |    |          |    |    |        |    |    |                      |    | 12 |    |
|                           | <i>H. pylori</i>       |                        |    |    |        |    |    |          |    |    |        |    |    |                      |    | 6  |    |
|                           | <i>K. pneumoniae</i>   |                        |    |    |        |    |    |          |    |    |        |    |    |                      |    | 12 |    |
|                           | <i>S. typhimurium</i>  |                        |    |    |        |    |    |          |    |    |        |    |    |                      |    | 12 |    |
|                           | <i>E. coli</i> MG1655  |                        |    |    |        |    |    |          |    |    |        |    |    |                      |    | 12 |    |
|                           | <i>E. coli</i> Sakai   |                        |    |    |        |    |    |          |    |    |        |    |    |                      |    | 12 |    |
|                           | <i>E. coli</i> EDL933  |                        |    |    |        |    |    |          |    |    |        |    |    |                      |    | 12 |    |
| <i>F. prausnitzii</i>     | <i>L. plantarum</i>    |                        |    |    |        |    |    |          |    |    |        |    |    |                      |    | 12 |    |
|                           | <i>L. lactis</i>       |                        |    |    |        |    |    |          |    |    |        |    |    |                      |    | 12 |    |
|                           | <i>S. thermophilus</i> |                        |    |    |        |    |    |          |    |    |        |    |    |                      |    | 12 |    |
|                           | <i>H. pylori</i>       |                        |    |    |        |    |    |          |    |    |        |    |    |                      |    | 6  |    |
|                           | <i>K. pneumoniae</i>   |                        |    |    |        |    |    |          |    |    |        |    |    |                      |    | 12 |    |
|                           | <i>S. typhimurium</i>  |                        |    |    |        |    |    |          |    |    |        |    |    |                      |    | 12 |    |
|                           | <i>E. coli</i> MG1655  |                        |    |    |        |    |    |          |    |    |        |    |    |                      |    | 12 |    |
|                           | <i>E. coli</i> Sakai   |                        |    |    |        |    |    |          |    |    |        |    |    |                      |    | 12 |    |
|                           | <i>E. coli</i> EDL933  |                        |    |    |        |    |    |          |    |    |        |    |    |                      |    | 12 |    |
|                           | <i>L. plantarum</i>    | <i>L. lactis</i>       |    |    |        |    |    |          |    |    |        |    |    |                      |    |    | 12 |
| <i>S. thermophilus</i>    |                        |                        |    |    |        |    |    |          |    |    |        |    |    |                      |    | 12 |    |
| <i>H. pylori</i>          |                        |                        |    |    |        |    |    |          |    |    |        |    |    |                      |    | 6  |    |
| <i>K. pneumoniae</i>      |                        |                        |    |    |        |    |    |          |    |    |        |    |    |                      |    | 12 |    |
| <i>S. typhimurium</i>     |                        |                        |    |    |        |    |    |          |    |    |        |    |    |                      |    | 12 |    |
| <i>E. coli</i> MG1655     |                        |                        |    |    |        |    |    |          |    |    |        |    |    |                      |    | 12 |    |
| <i>E. coli</i> Sakai      |                        |                        |    |    |        |    |    |          |    |    |        |    |    |                      |    | 12 |    |
| <i>E. coli</i> EDL933     |                        |                        |    |    |        |    |    |          |    |    |        |    |    |                      |    | 12 |    |
| <i>L. lactis</i>          |                        | <i>S. thermophilus</i> |    |    |        |    |    |          |    |    |        |    |    |                      |    |    | 12 |
|                           |                        | <i>H. pylori</i>       |    |    |        |    |    |          |    |    |        |    |    |                      |    |    | 6  |
|                           | <i>K. pneumoniae</i>   |                        |    |    |        |    |    |          |    |    |        |    |    |                      |    | 12 |    |
|                           | <i>S. typhimurium</i>  |                        |    |    |        |    |    |          |    |    |        |    |    |                      |    | 12 |    |
|                           | <i>E. coli</i> MG1655  |                        |    |    |        |    |    |          |    |    |        |    |    |                      |    | 12 |    |
|                           | <i>E. coli</i> Sakai   |                        |    |    |        |    |    |          |    |    |        |    |    |                      |    | 12 |    |
|                           | <i>E. coli</i> EDL933  |                        |    |    |        |    |    |          |    |    |        |    |    |                      |    | 12 |    |
|                           | <i>S. thermophilus</i> | <i>H. pylori</i>       |    |    |        |    |    |          |    |    |        |    |    |                      |    |    | 6  |
|                           |                        | <i>K. pneumoniae</i>   |    |    |        |    |    |          |    |    |        |    |    |                      |    |    | 12 |
|                           |                        | <i>S. typhimurium</i>  |    |    |        |    |    |          |    |    |        |    |    |                      |    |    | 12 |
| <i>E. coli</i> MG1655     |                        |                        |    |    |        |    |    |          |    |    |        |    |    |                      |    | 12 |    |
| <i>E. coli</i> Sakai      |                        |                        |    |    |        |    |    |          |    |    |        |    |    |                      |    | 12 |    |
| <i>E. coli</i> EDL933     |                        |                        |    |    |        |    |    |          |    |    |        |    |    |                      |    | 12 |    |
| <i>H. pylori</i>          | <i>K. pneumoniae</i>   |                        |    |    |        |    |    |          |    |    |        |    |    |                      |    | 6  |    |
|                           | <i>S. typhimurium</i>  |                        |    |    |        |    |    |          |    |    |        |    |    |                      |    | 6  |    |
|                           | <i>E. coli</i> MG1655  |                        |    |    |        |    |    |          |    |    |        |    |    |                      |    | 6  |    |
|                           | <i>E. coli</i> Sakai   |                        |    |    |        |    |    |          |    |    |        |    |    |                      |    | 6  |    |
|                           | <i>E. coli</i> EDL933  |                        |    |    |        |    |    |          |    |    |        |    |    |                      |    | 6  |    |
| <i>K. pneu</i>            | <i>S. typhimurium</i>  |                        |    |    |        |    |    |          |    |    |        |    |    |                      |    | 12 |    |
|                           | <i>E. coli</i> MG1655  |                        |    |    |        |    |    |          |    |    |        |    |    |                      |    | 12 |    |
|                           | <i>E. coli</i> Sakai   |                        |    |    |        |    |    |          |    |    |        |    |    |                      |    | 12 |    |
|                           | <i>E. coli</i> EDL933  |                        |    |    |        |    |    |          |    |    |        |    |    |                      |    | 12 |    |
| <i>S. typh</i>            | <i>E. coli</i> MG1655  |                        |    |    |        |    |    |          |    |    |        |    |    |                      |    | 12 |    |
|                           | <i>E. coli</i> Sakai   |                        |    |    |        |    |    |          |    |    |        |    |    |                      |    | 12 |    |
|                           | <i>E. coli</i> EDL933  |                        |    |    |        |    |    |          |    |    |        |    |    |                      |    | 12 |    |
| EC MG1655                 | <i>E. coli</i> Sakai   |                        |    |    |        |    |    |          |    |    |        |    |    |                      |    | 12 |    |
|                           | <i>E. coli</i> EDL933  |                        |    |    |        |    |    |          |    |    |        |    |    |                      |    | 12 |    |
| EC Sakai                  | <i>E. coli</i> EDL933  |                        |    |    |        |    |    |          |    |    |        |    |    |                      |    | 12 |    |
| # interactions/ scenario  |                        | 37                     | 38 | 36 | 23     | 23 | 44 | 40       | 37 | 39 | 22     | 25 | 47 |                      |    |    |    |

**Figure S3:** Number of metabolic exchange strategies (defined in Table S6) displayed per pair in the 12 scenarios. WD = Western diet, HFD = high fiber diet, PD = protein diet, sIEc = small intestinal enterocyte.

## Percentages of utilized exchange strategies shown per interaction type

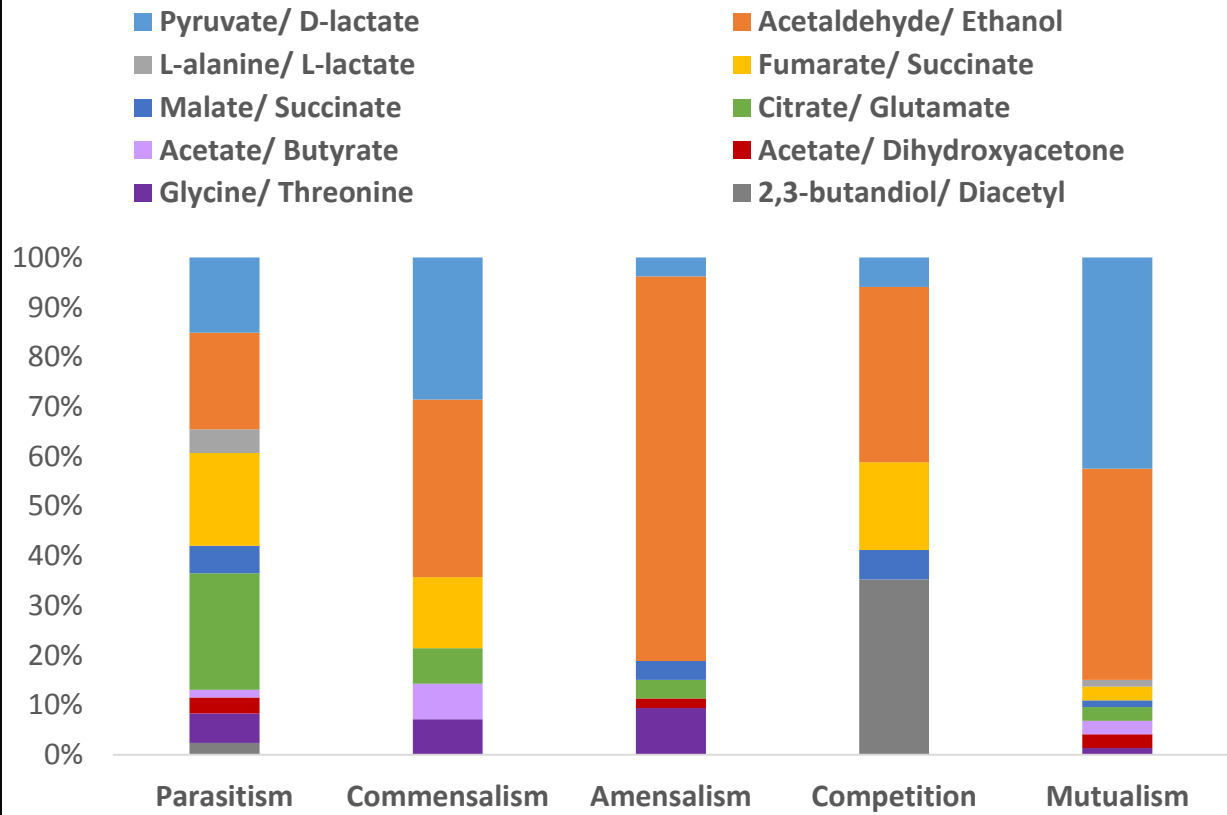

|                     | <b>Total exchange strategies #</b> | <b>Pairs #</b> | <b>Exchanges/pair</b> |
|---------------------|------------------------------------|----------------|-----------------------|
| <b>Parasitism</b>   | 252                                | 299            | 0.84                  |
| <b>Commensalism</b> | 14                                 | 21             | 0.67                  |
| <b>Neutralism</b>   | 0                                  | 1              | 0.00                  |
| <b>Amensalism</b>   | 53                                 | 175            | 0.30                  |
| <b>Competition</b>  | 17                                 | 67             | 0.25                  |
| <b>Mutualism</b>    | 73                                 | 37             | 1.97                  |

**Figure S4:** Number of metabolite exchange strategies (defined in Table S6) computed per interaction type and pair, and percentage of exchange strategies computed for each interaction type.

## Microbes classified by interactions Western diet (4 scenarios total)

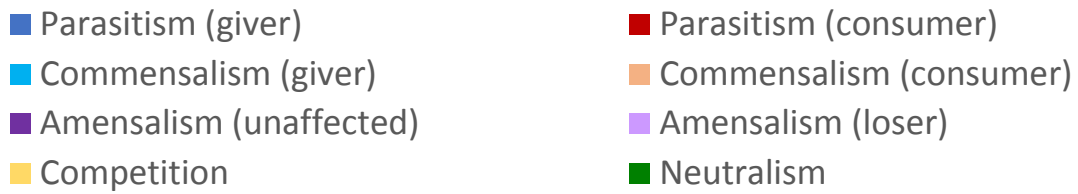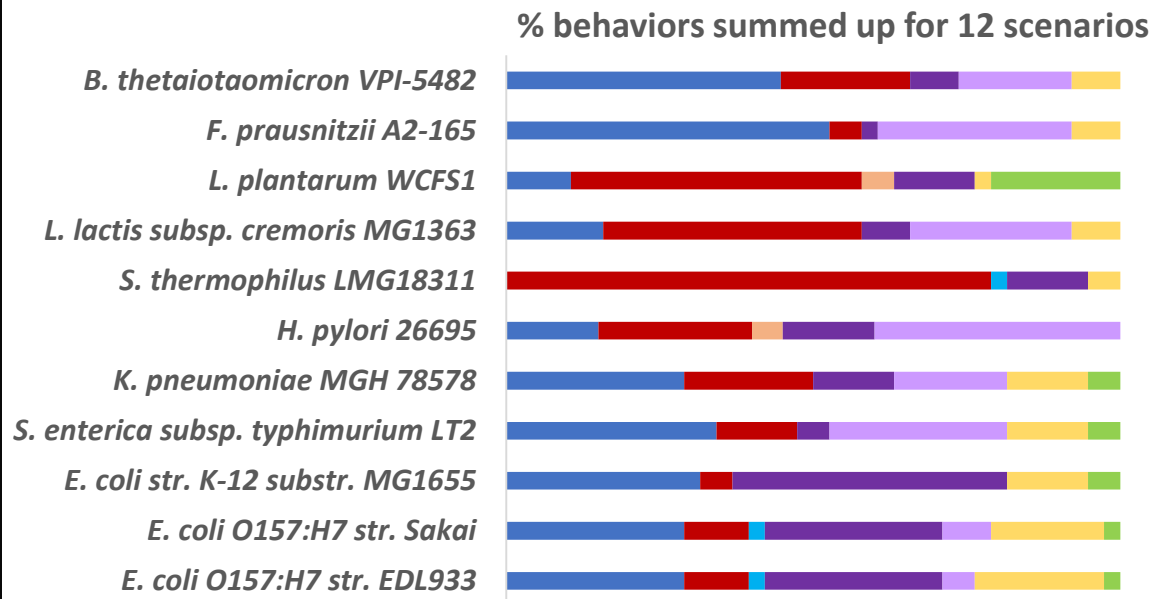

**Figure S5a:** Microbes classified by % interactions participated in on Western diet. The plot sums up 40 interactions per microbe in four scenarios (Figure 2c), with the exception of *H. pylori* for which only 20 interactions were calculated as no growth was predicted without oxygen. In total, 400 interactions were predicted on Western diet (200 pairs).

## Microbes classified by interactions High fiber diet (4 scenarios total)

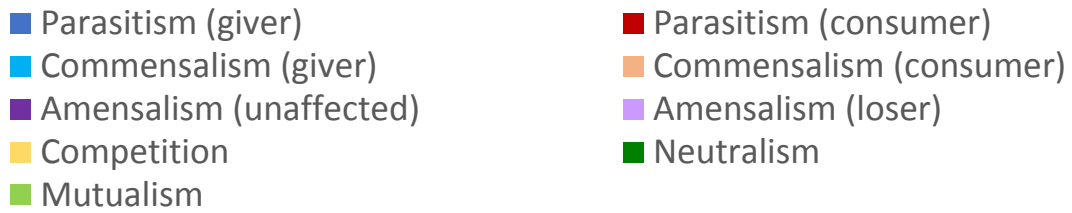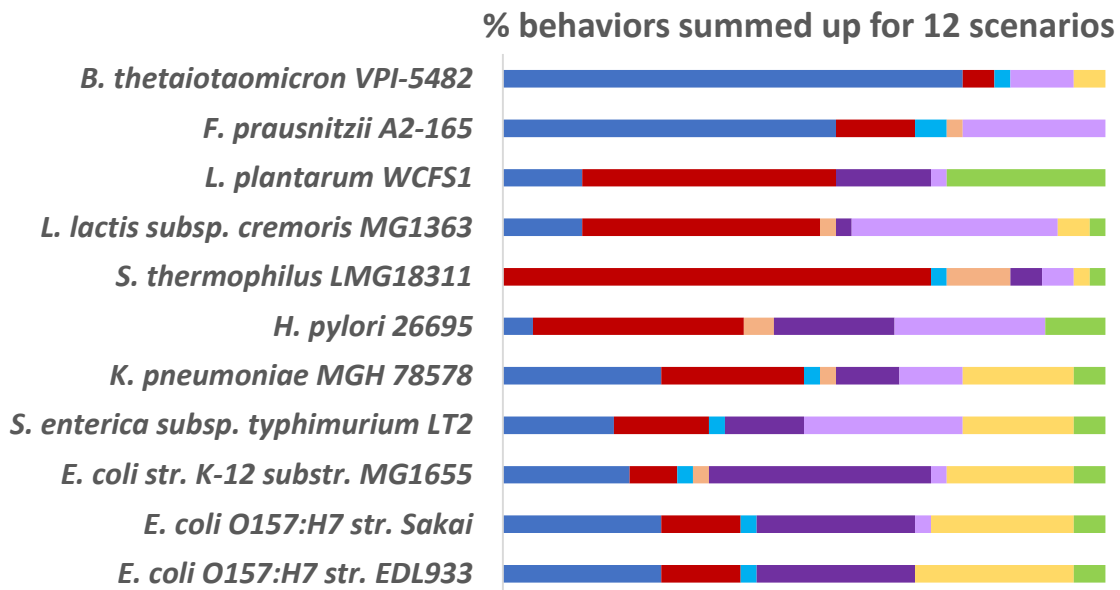

**Figure S5b:** Microbes classified by % interactions participated in on High fiber diet. The plot sums up 40 interactions per microbe in four scenarios (Figure 2c), with the exception of *H. pylori* for which only 20 interactions were calculated as no growth was predicted without oxygen. In total, 400 interactions were predicted on High fiber diet (200 pairs).

## Microbes classified by interactions Protein diet (4 scenarios total)

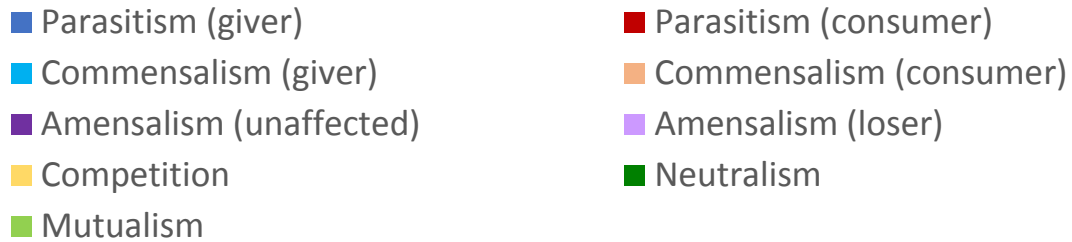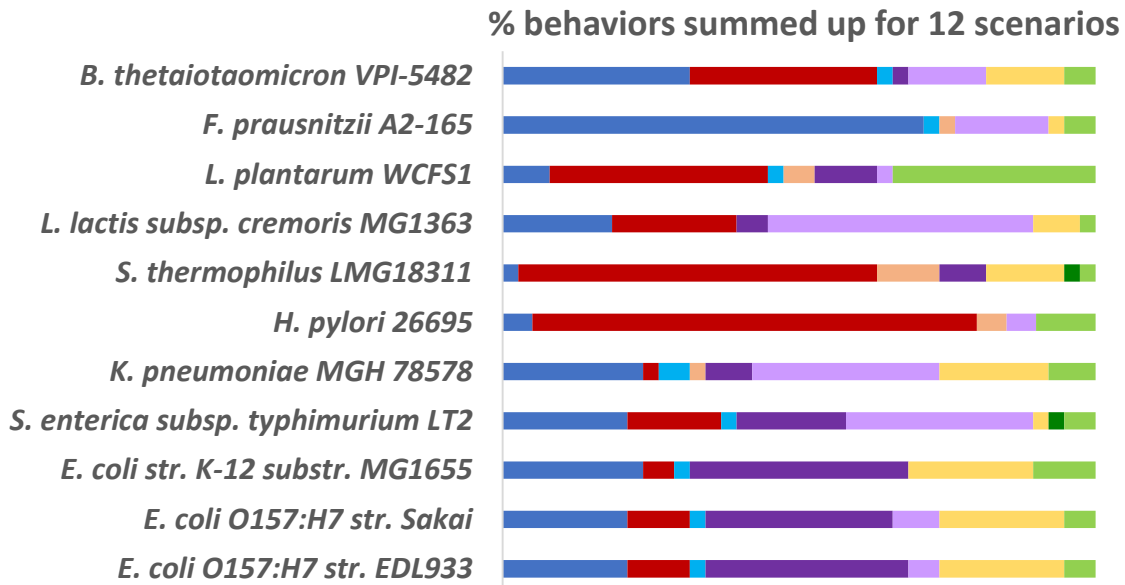

**Figure S5c:** Microbes classified by % interactions participated in on Protein diet. The plot sums up 40 interactions per microbe in four scenarios (Figure 2c), with the exception of *H. pylori* for which only 20 interactions were calculated as no growth was predicted without oxygen. In total, 400 interactions were predicted on Protein diet (200 pairs).



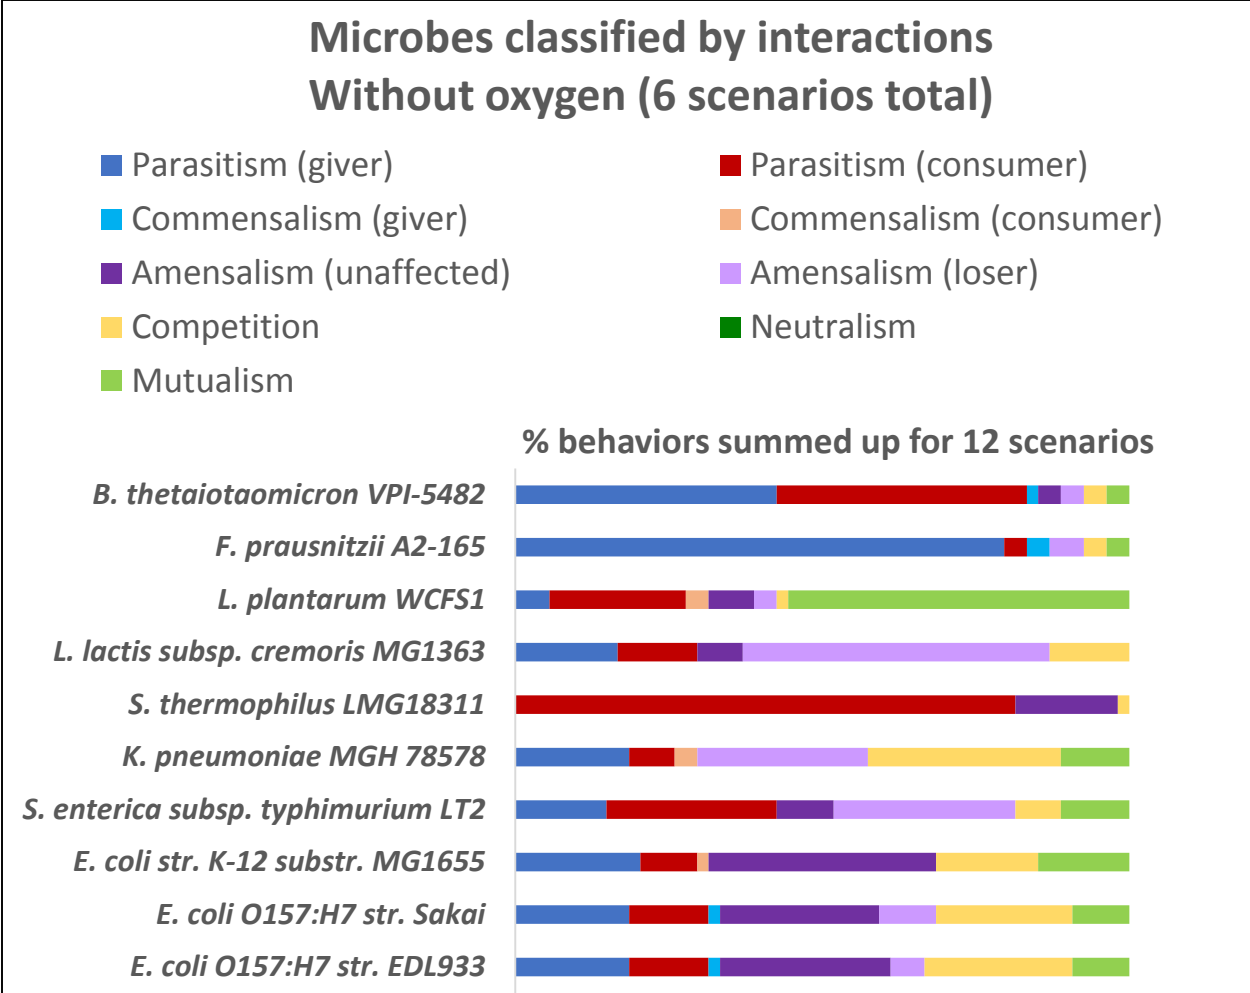

**Figure S6a:** Microbes classified by % interactions participated in on scenarios without oxygen (six in total, Figure 2c). The plot sums up 54 interactions per microbe. In total, 540 interactions were predicted on scenarios without oxygen (270 pairs).

## Microbes classified by interactions With oxygen (6 scenarios total)

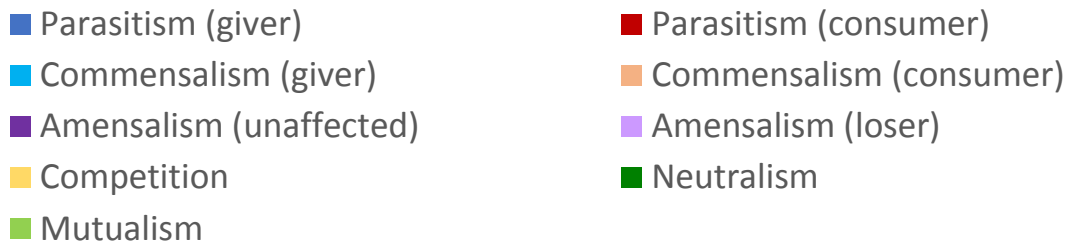

% behaviors summed up for 12 scenarios

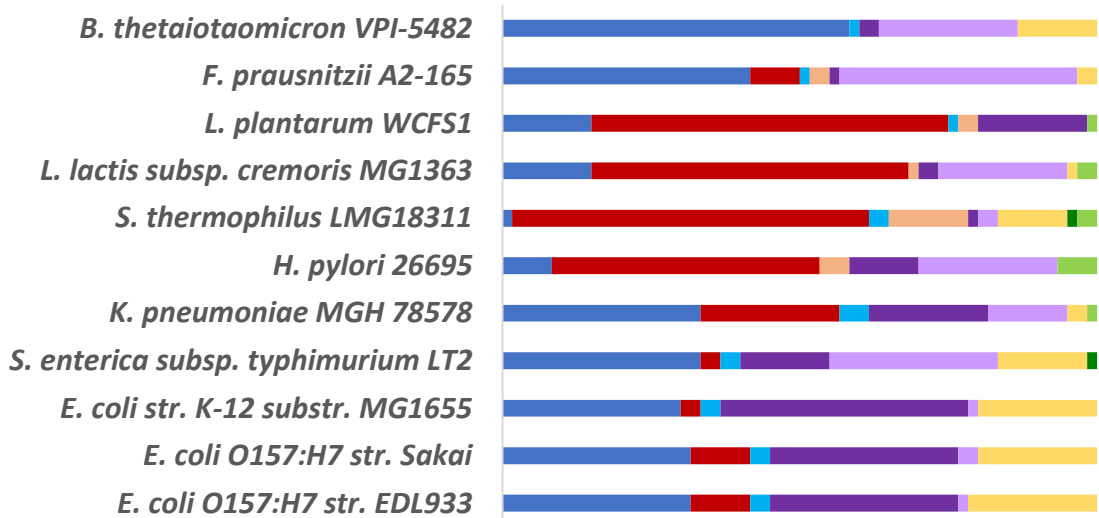

**Figure S6b:** Microbes classified by % interactions participated in on scenarios with oxygen (six in total, Figure 2c). The plot sums up 60 interactions per microbe. In total, 660 interactions were predicted on scenarios without oxygen (330 pairs).

## Microbes classified by interactions Without enterocyte (6 scenarios total)

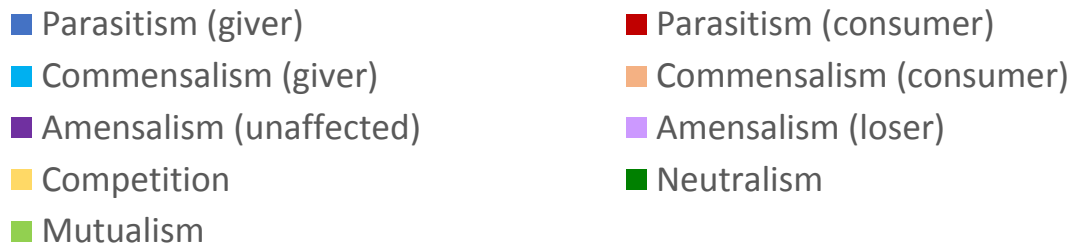

% behaviors summed up for 12 scenarios

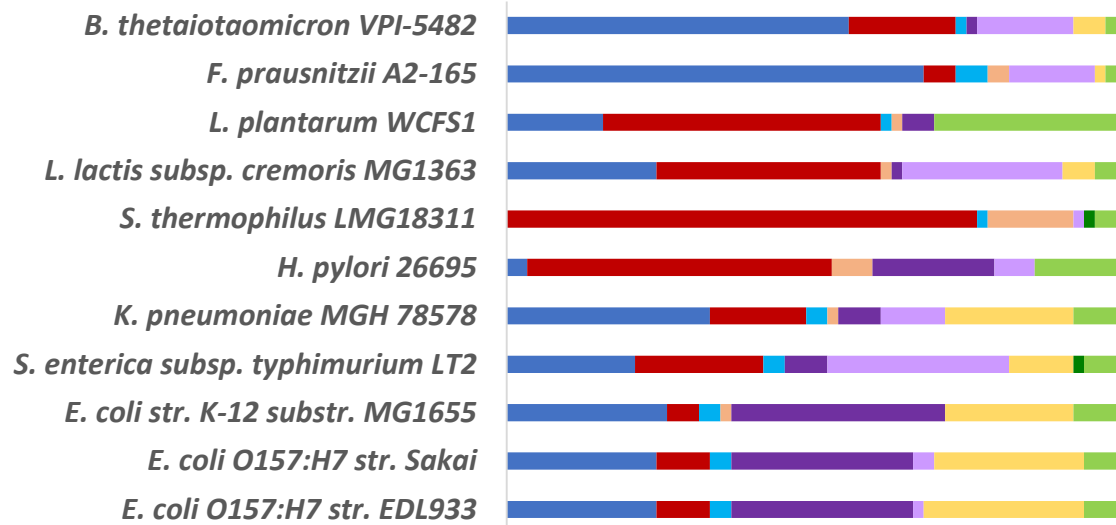

**Figure S7a:** Microbes classified by % interactions participated in on scenarios without enterocyte. The plot sums up 60 interactions per microbe in six scenarios (Figure 2c), with the exception of *H. pylori* for which only 30 interactions were calculated as no growth was predicted without oxygen. In total, 600 interactions were predicted on scenarios without enterocyte (300 pairs).

## Microbes classified by interactions With enterocyte (6 scenarios total)

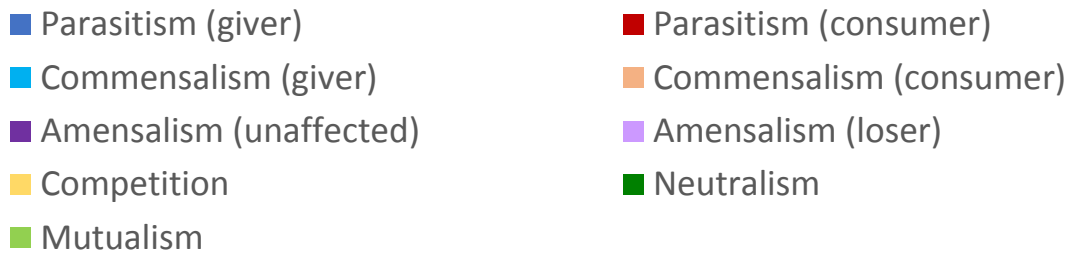

% behaviors summed up for 12 scenarios

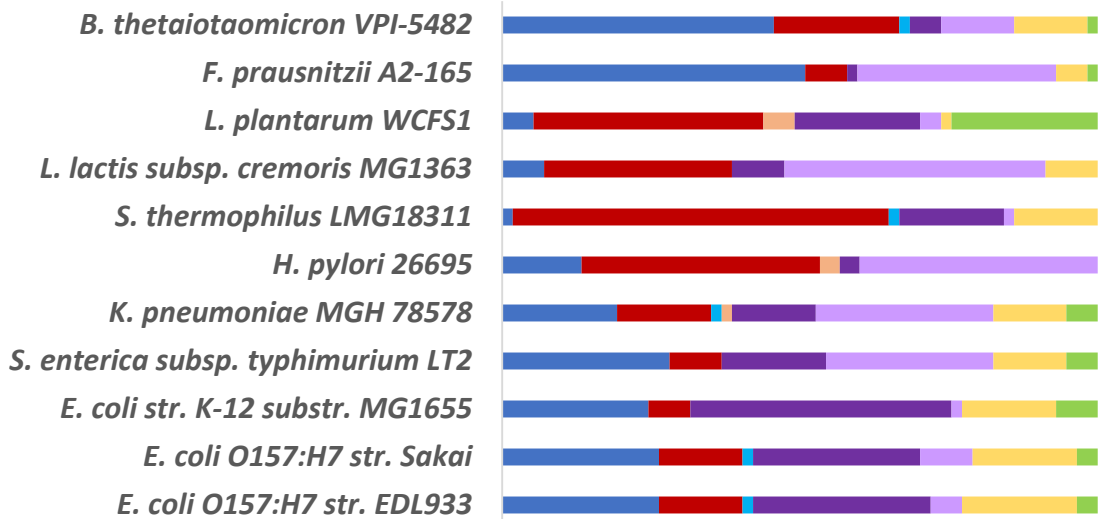

**Figure S7b:** Microbes classified by % interactions participated in on scenarios with enterocyte. The plot sums up 60 interactions per microbe in six scenarios (Figure 2c), with the exception of *H. pylori* for which only 30 interactions were calculated as no growth was predicted without oxygen. In total, 600 interactions were predicted on scenarios with enterocyte (300 pairs).

## Supplemental References

1. Heinken A, Thiele I. Systematic prediction of health-relevant human-microbial co-metabolism through a computational framework. *Gut Microbes*.
2. Heinken A, Sahoo S, Fleming RM, Thiele I. Systems-level characterization of a host-microbe metabolic symbiosis in the mammalian gut. *Gut Microbes* 2013; 4:28-40.
3. Heinken A, Khan MT, Paglia G, Rodionov DA, Harmsen HJ, Thiele I. A functional metabolic map of *Faecalibacterium prausnitzii*, a beneficial human gut microbe. *J Bacteriol* 2014.
4. Baumler DJ, Peplinski RG, Reed JL, Glasner JD, Perna NT. The evolution of metabolic networks of *E. coli*. *BMC Syst Biol* 2011; 5:182.
5. Teusink B, Wiersma A, Molenaar D, Francke C, de Vos WM, Siezen RJ, et al. Analysis of growth of *Lactobacillus plantarum* WCFS1 on a complex medium using a genome-scale metabolic model. *The Journal of biological chemistry* 2006; 281:40041-8.
6. Flahaut NA, Wiersma A, van de Bunt B, Martens DE, Schaap PJ, Sijtsma L, et al. Genome-scale metabolic model for *Lactococcus lactis* MG1363 and its application to the analysis of flavor formation. *Applied microbiology and biotechnology* 2013; 97:8729-39.
7. Pastink MI, Teusink B, Hols P, Visser S, de Vos WM, Hugenholtz J. Genome-scale model of *Streptococcus thermophilus* LMG18311 for metabolic comparison of lactic acid bacteria. *Appl Environ Microbiol* 2009; 75:3627-33.
8. Thiele I, Vo TD, Price ND, Palsson BO. Expanded metabolic reconstruction of *Helicobacter pylori* (iIT341 GSM/GPR): an in silico genome-scale characterization of single- and double-deletion mutants. *J Bacteriol* 2005; 187:5818-30.
9. Liao YC, Huang TW, Chen FC, Charusanti P, Hong JS, Chang HY, et al. An experimentally validated genome-scale metabolic reconstruction of *Klebsiella pneumoniae* MGH 78578, iYL1228. *J Bacteriol* 2011; 193:1710-7.
10. Thiele I, Hyduke DR, Steeb B, Fankam G, Allen DK, Bazzani S, et al. A community effort towards a knowledge-base and mathematical model of the human pathogen *Salmonella Typhimurium* LT2. *BMC Syst Biol* 2011; 5:8.
11. Sahoo S, Thiele I. Predicting the impact of diet and enzymopathies on human small intestinal epithelial cells. *Human molecular genetics* 2013; 22:2705-22.
